# Supplementary material for: WDR72 Enhances the Stemness of Lung Cancer Cells by Activating the AKT/HIF-1α Signaling Pathway
Source: Hindawi journal article supplement (doi:10.1155/2022/5059588), 2022-11-07

**A**

### IHC: anti-WDR72

Adjacent tissue

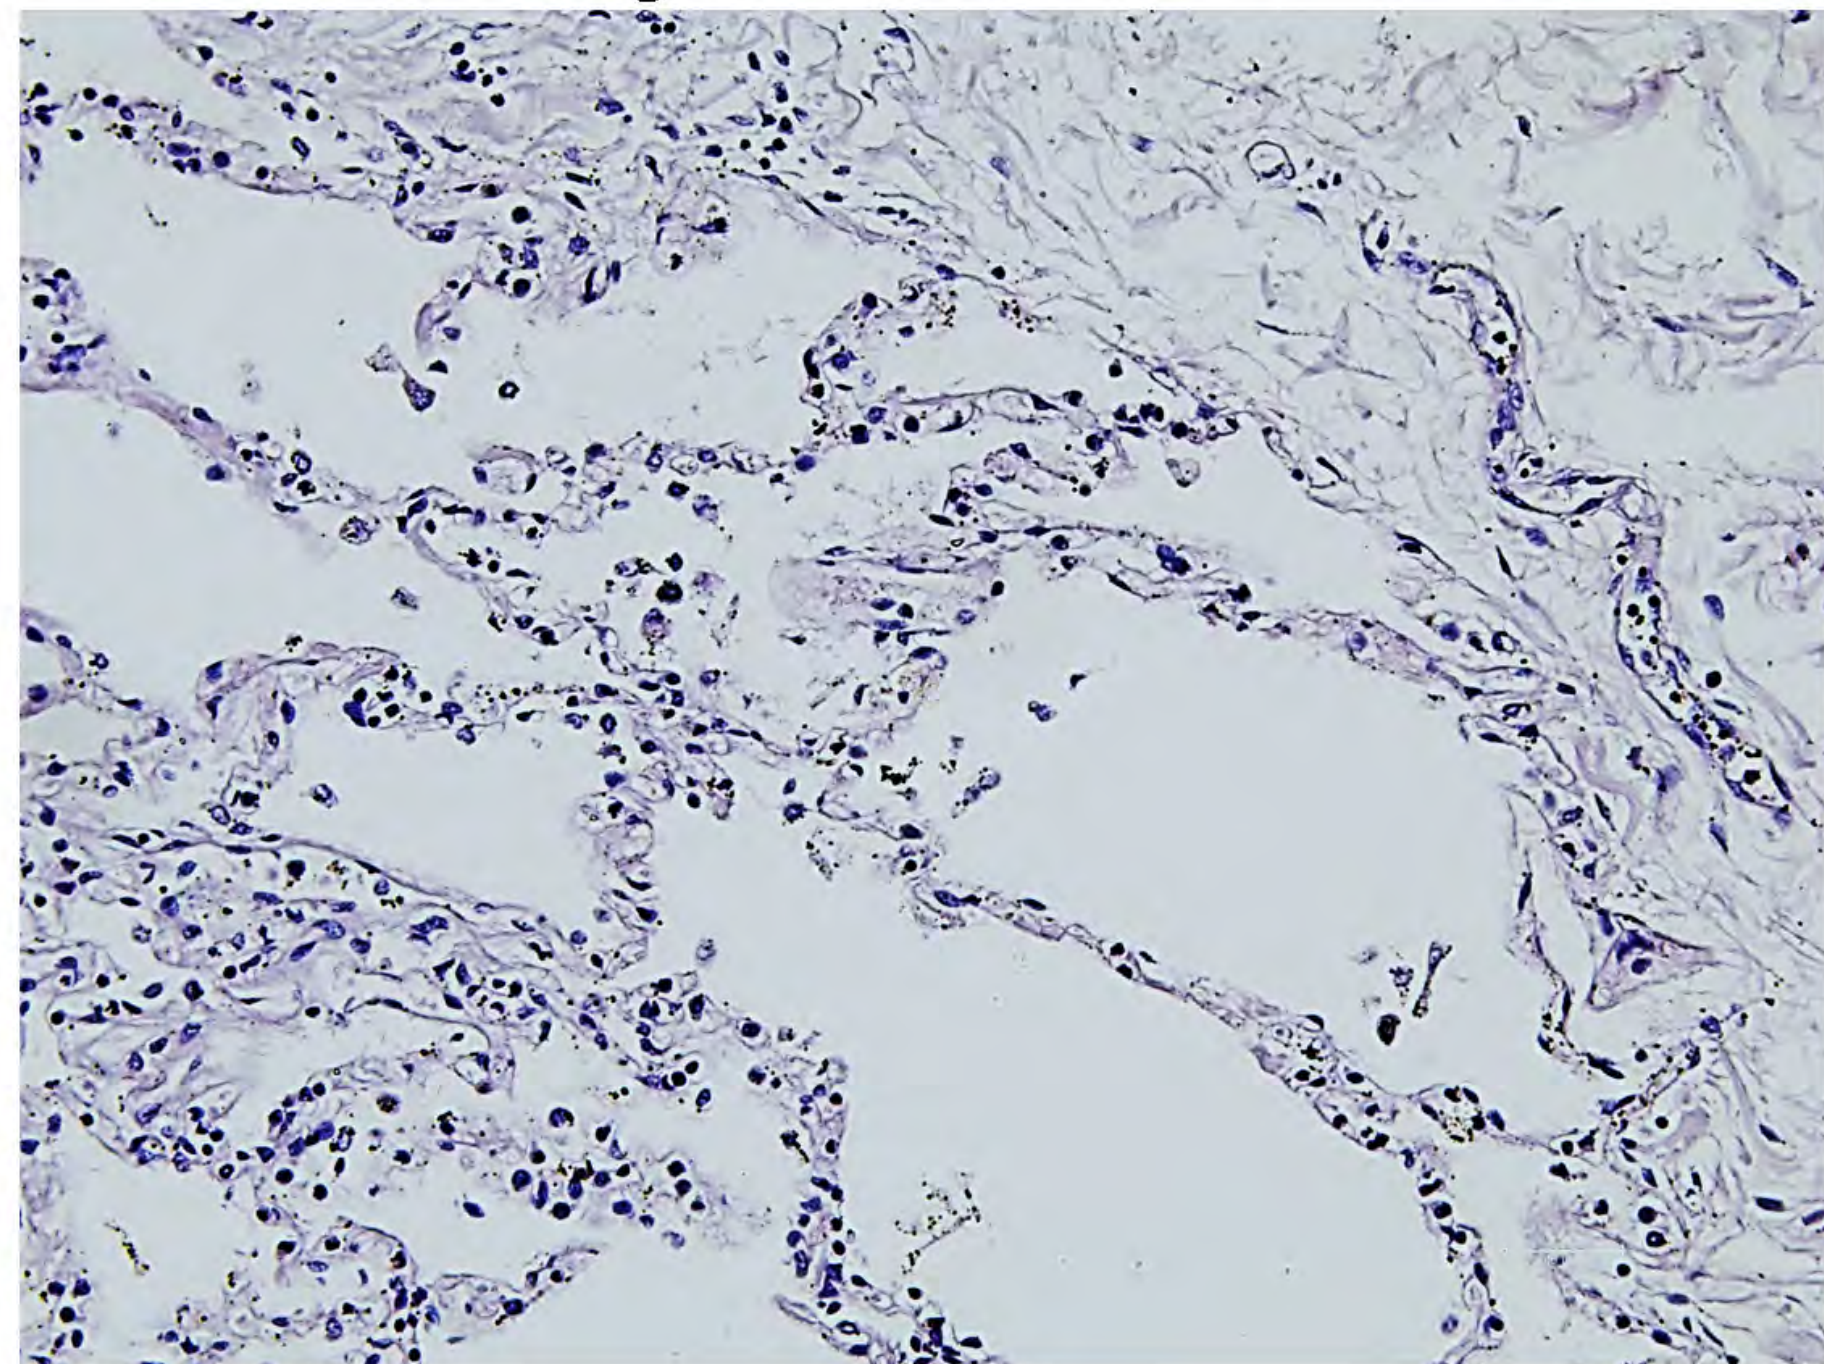

Cancer tissue

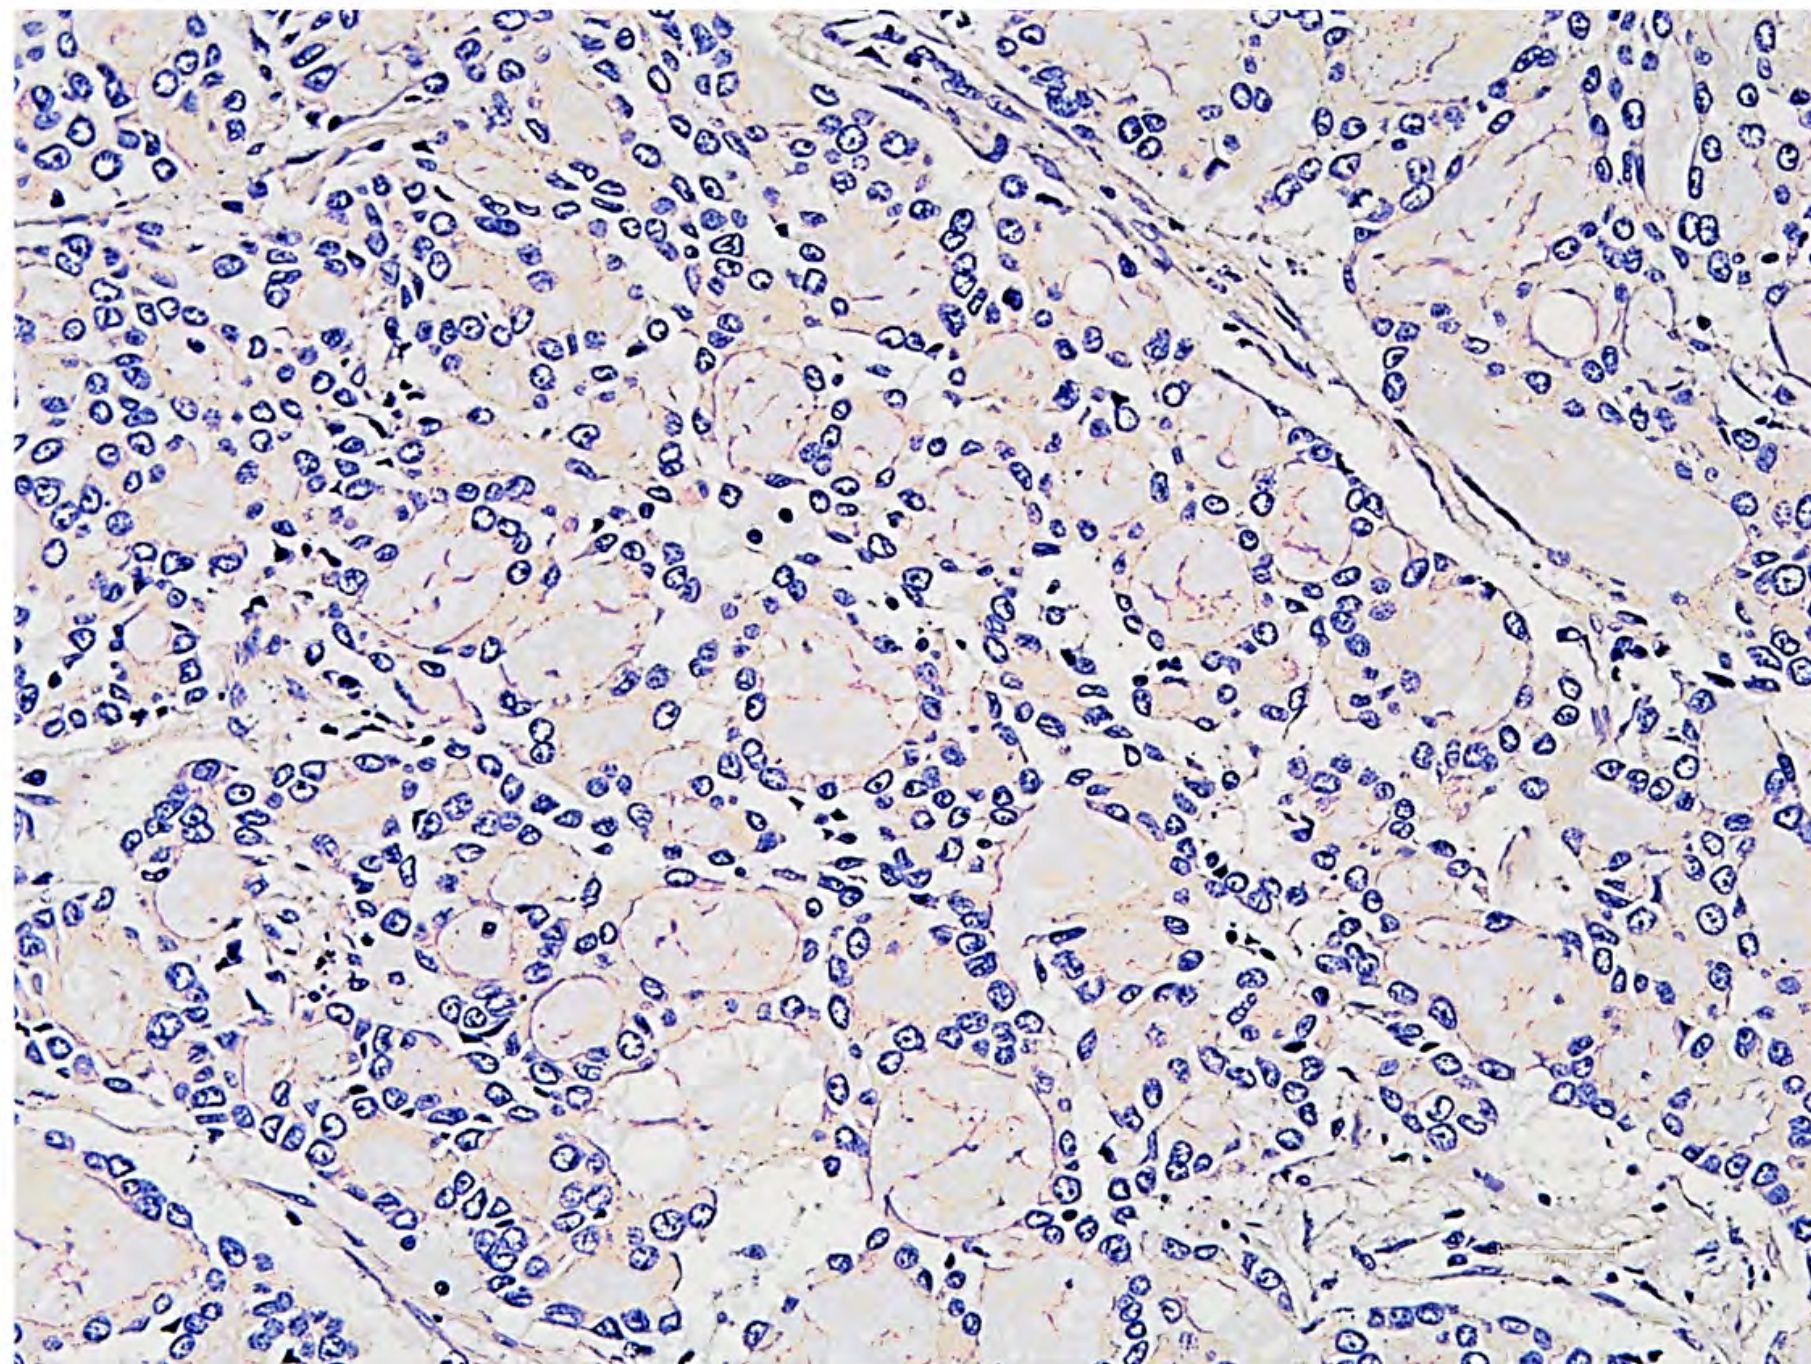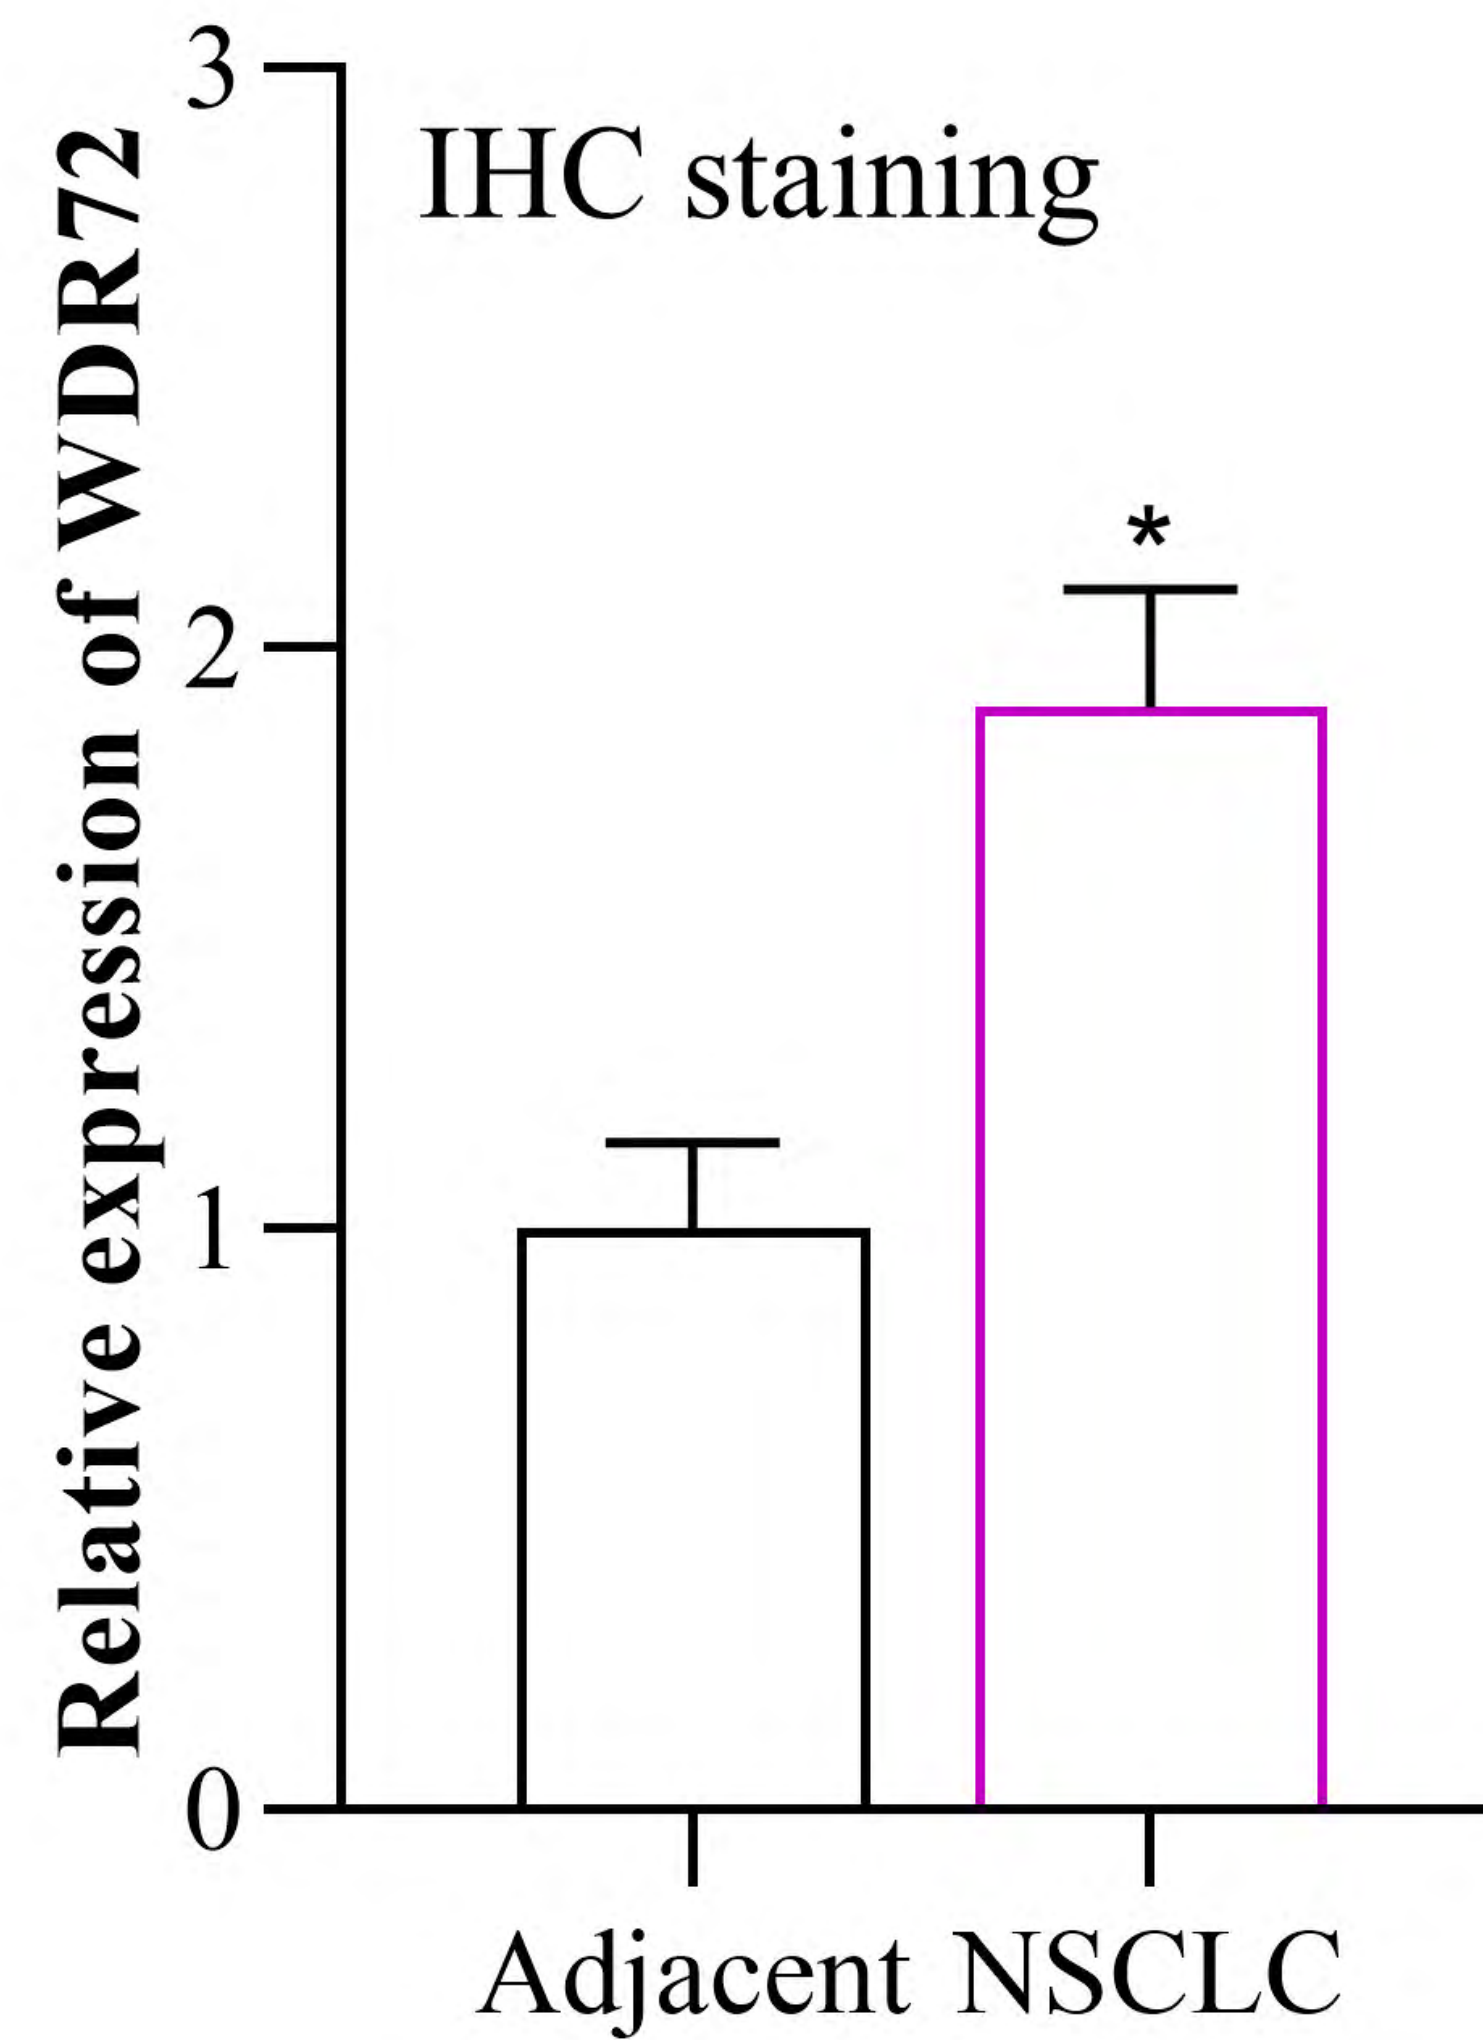



**A****WDR72 (227174\_at)**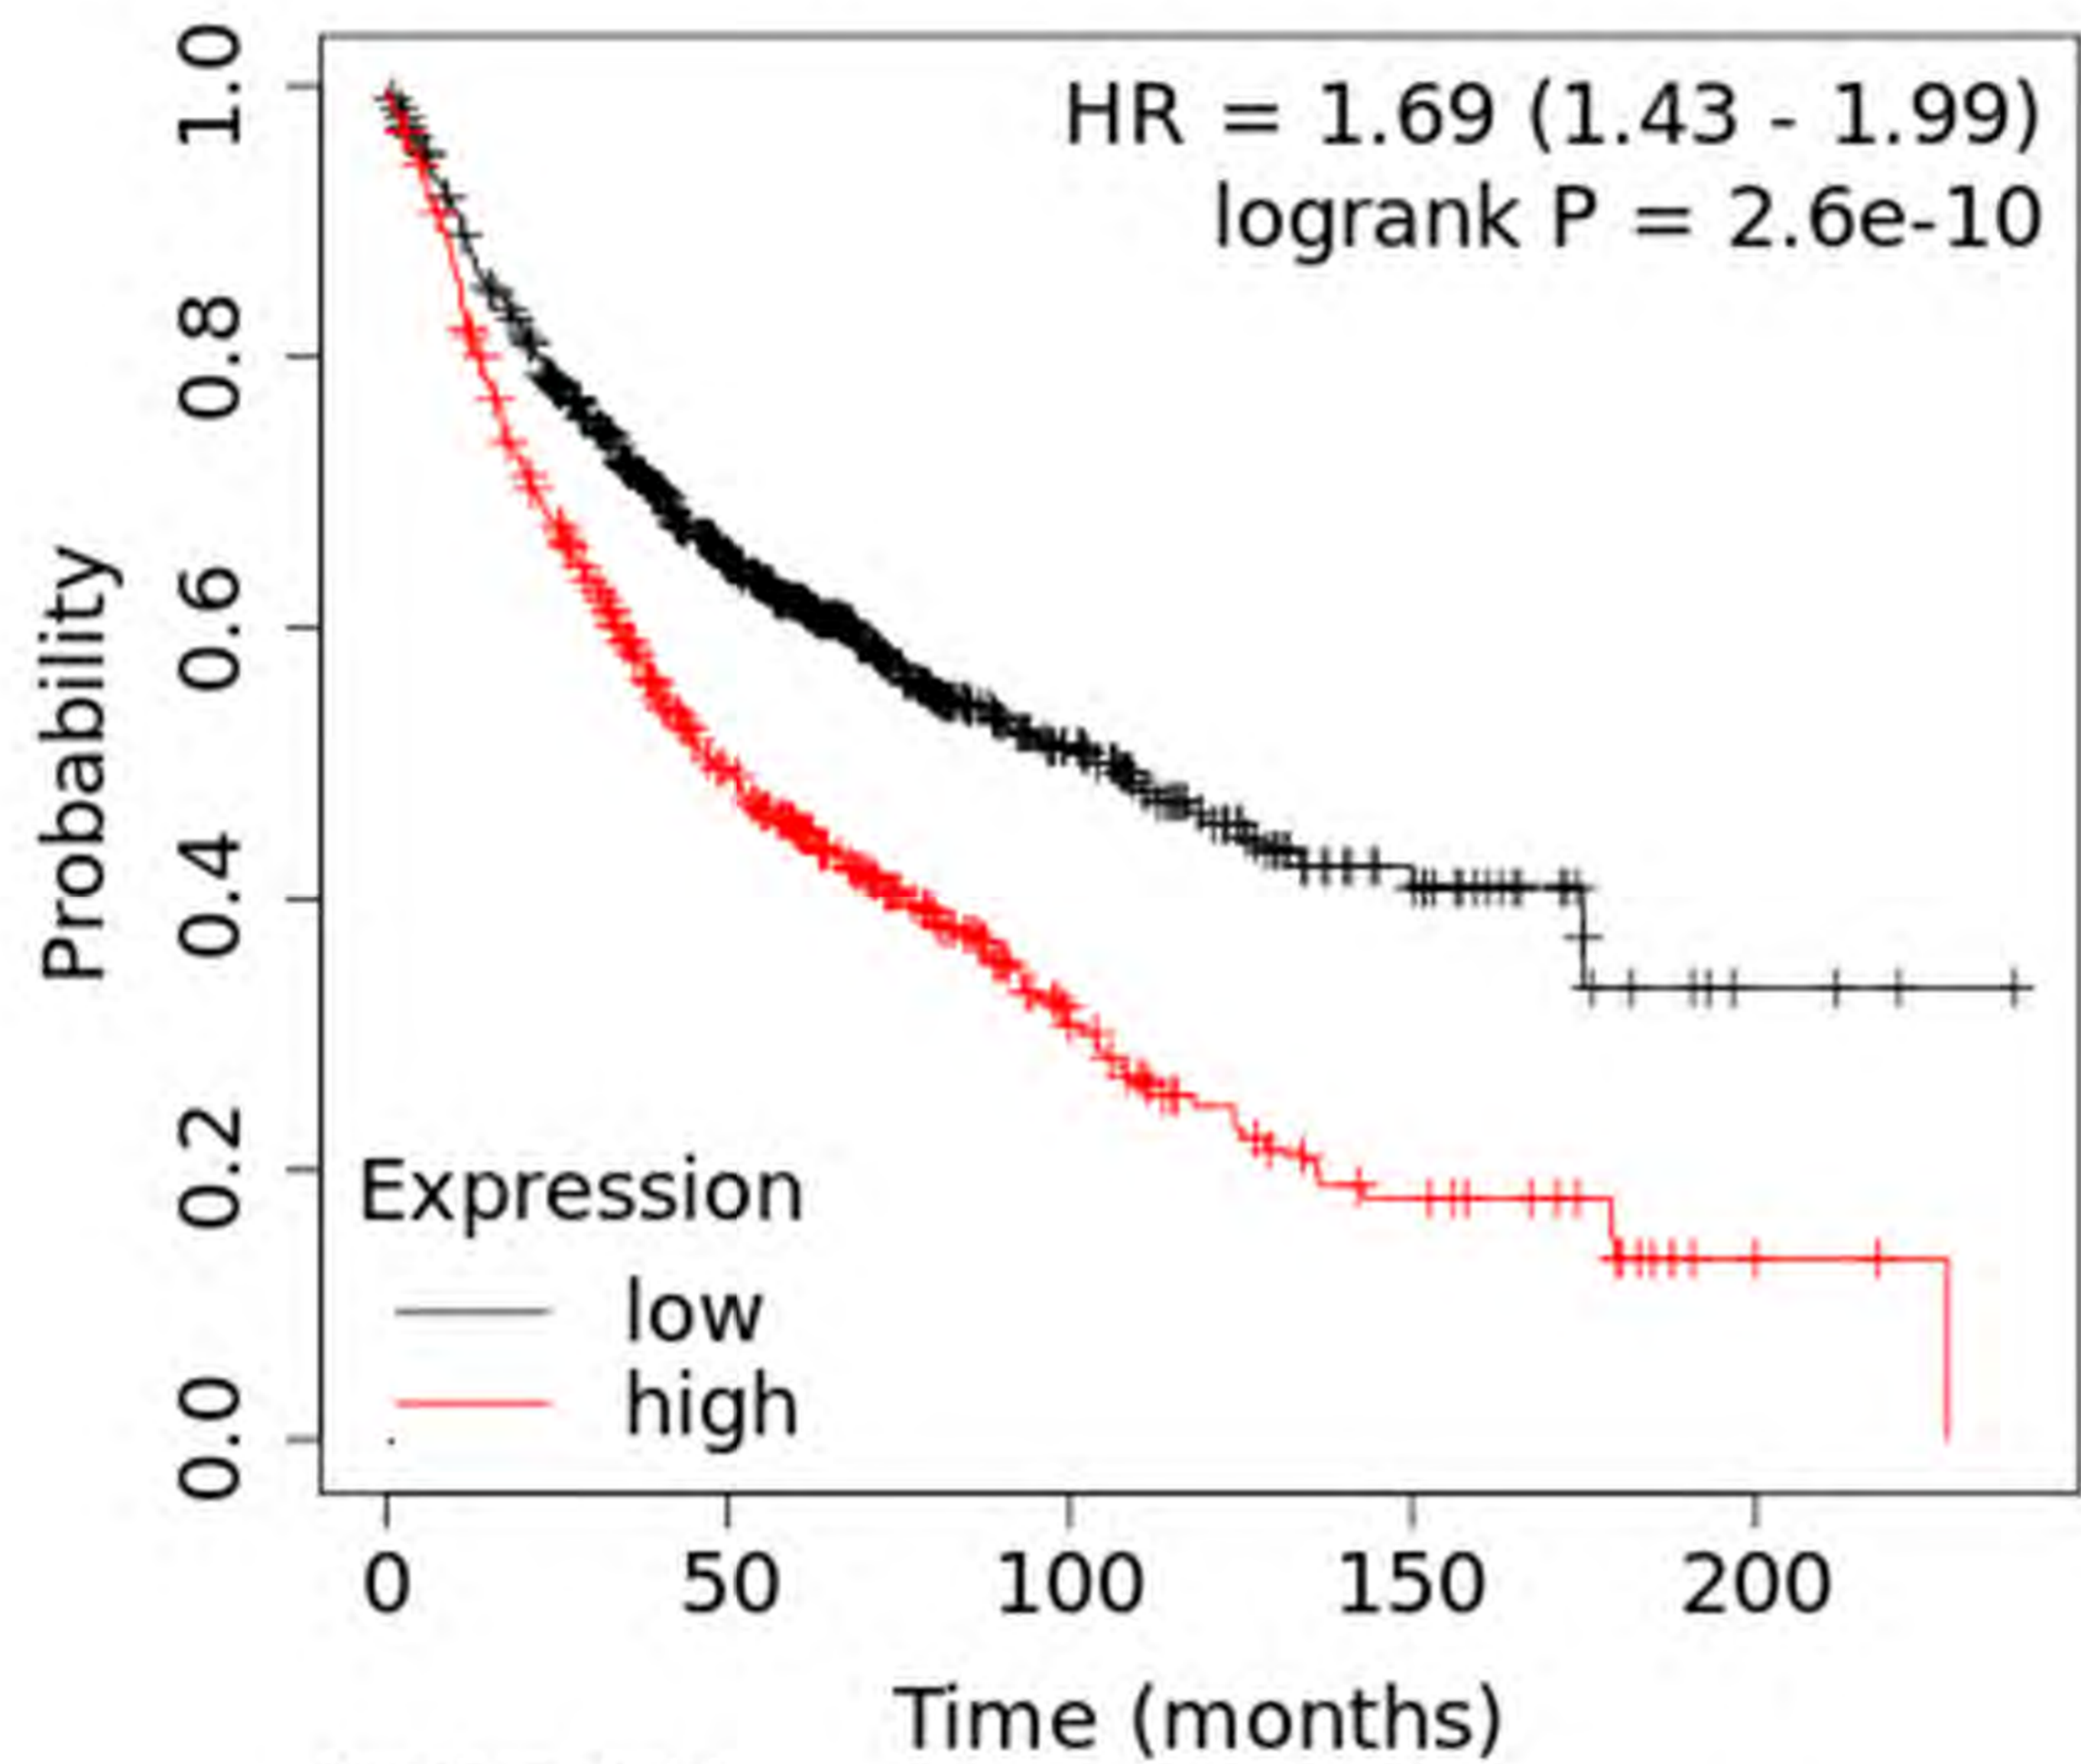

|      | Number at risk |     |    |    |   |
|------|----------------|-----|----|----|---|
| low  | 725            | 373 | 89 | 27 | 3 |
| high | 419            | 172 | 50 | 19 | 3 |



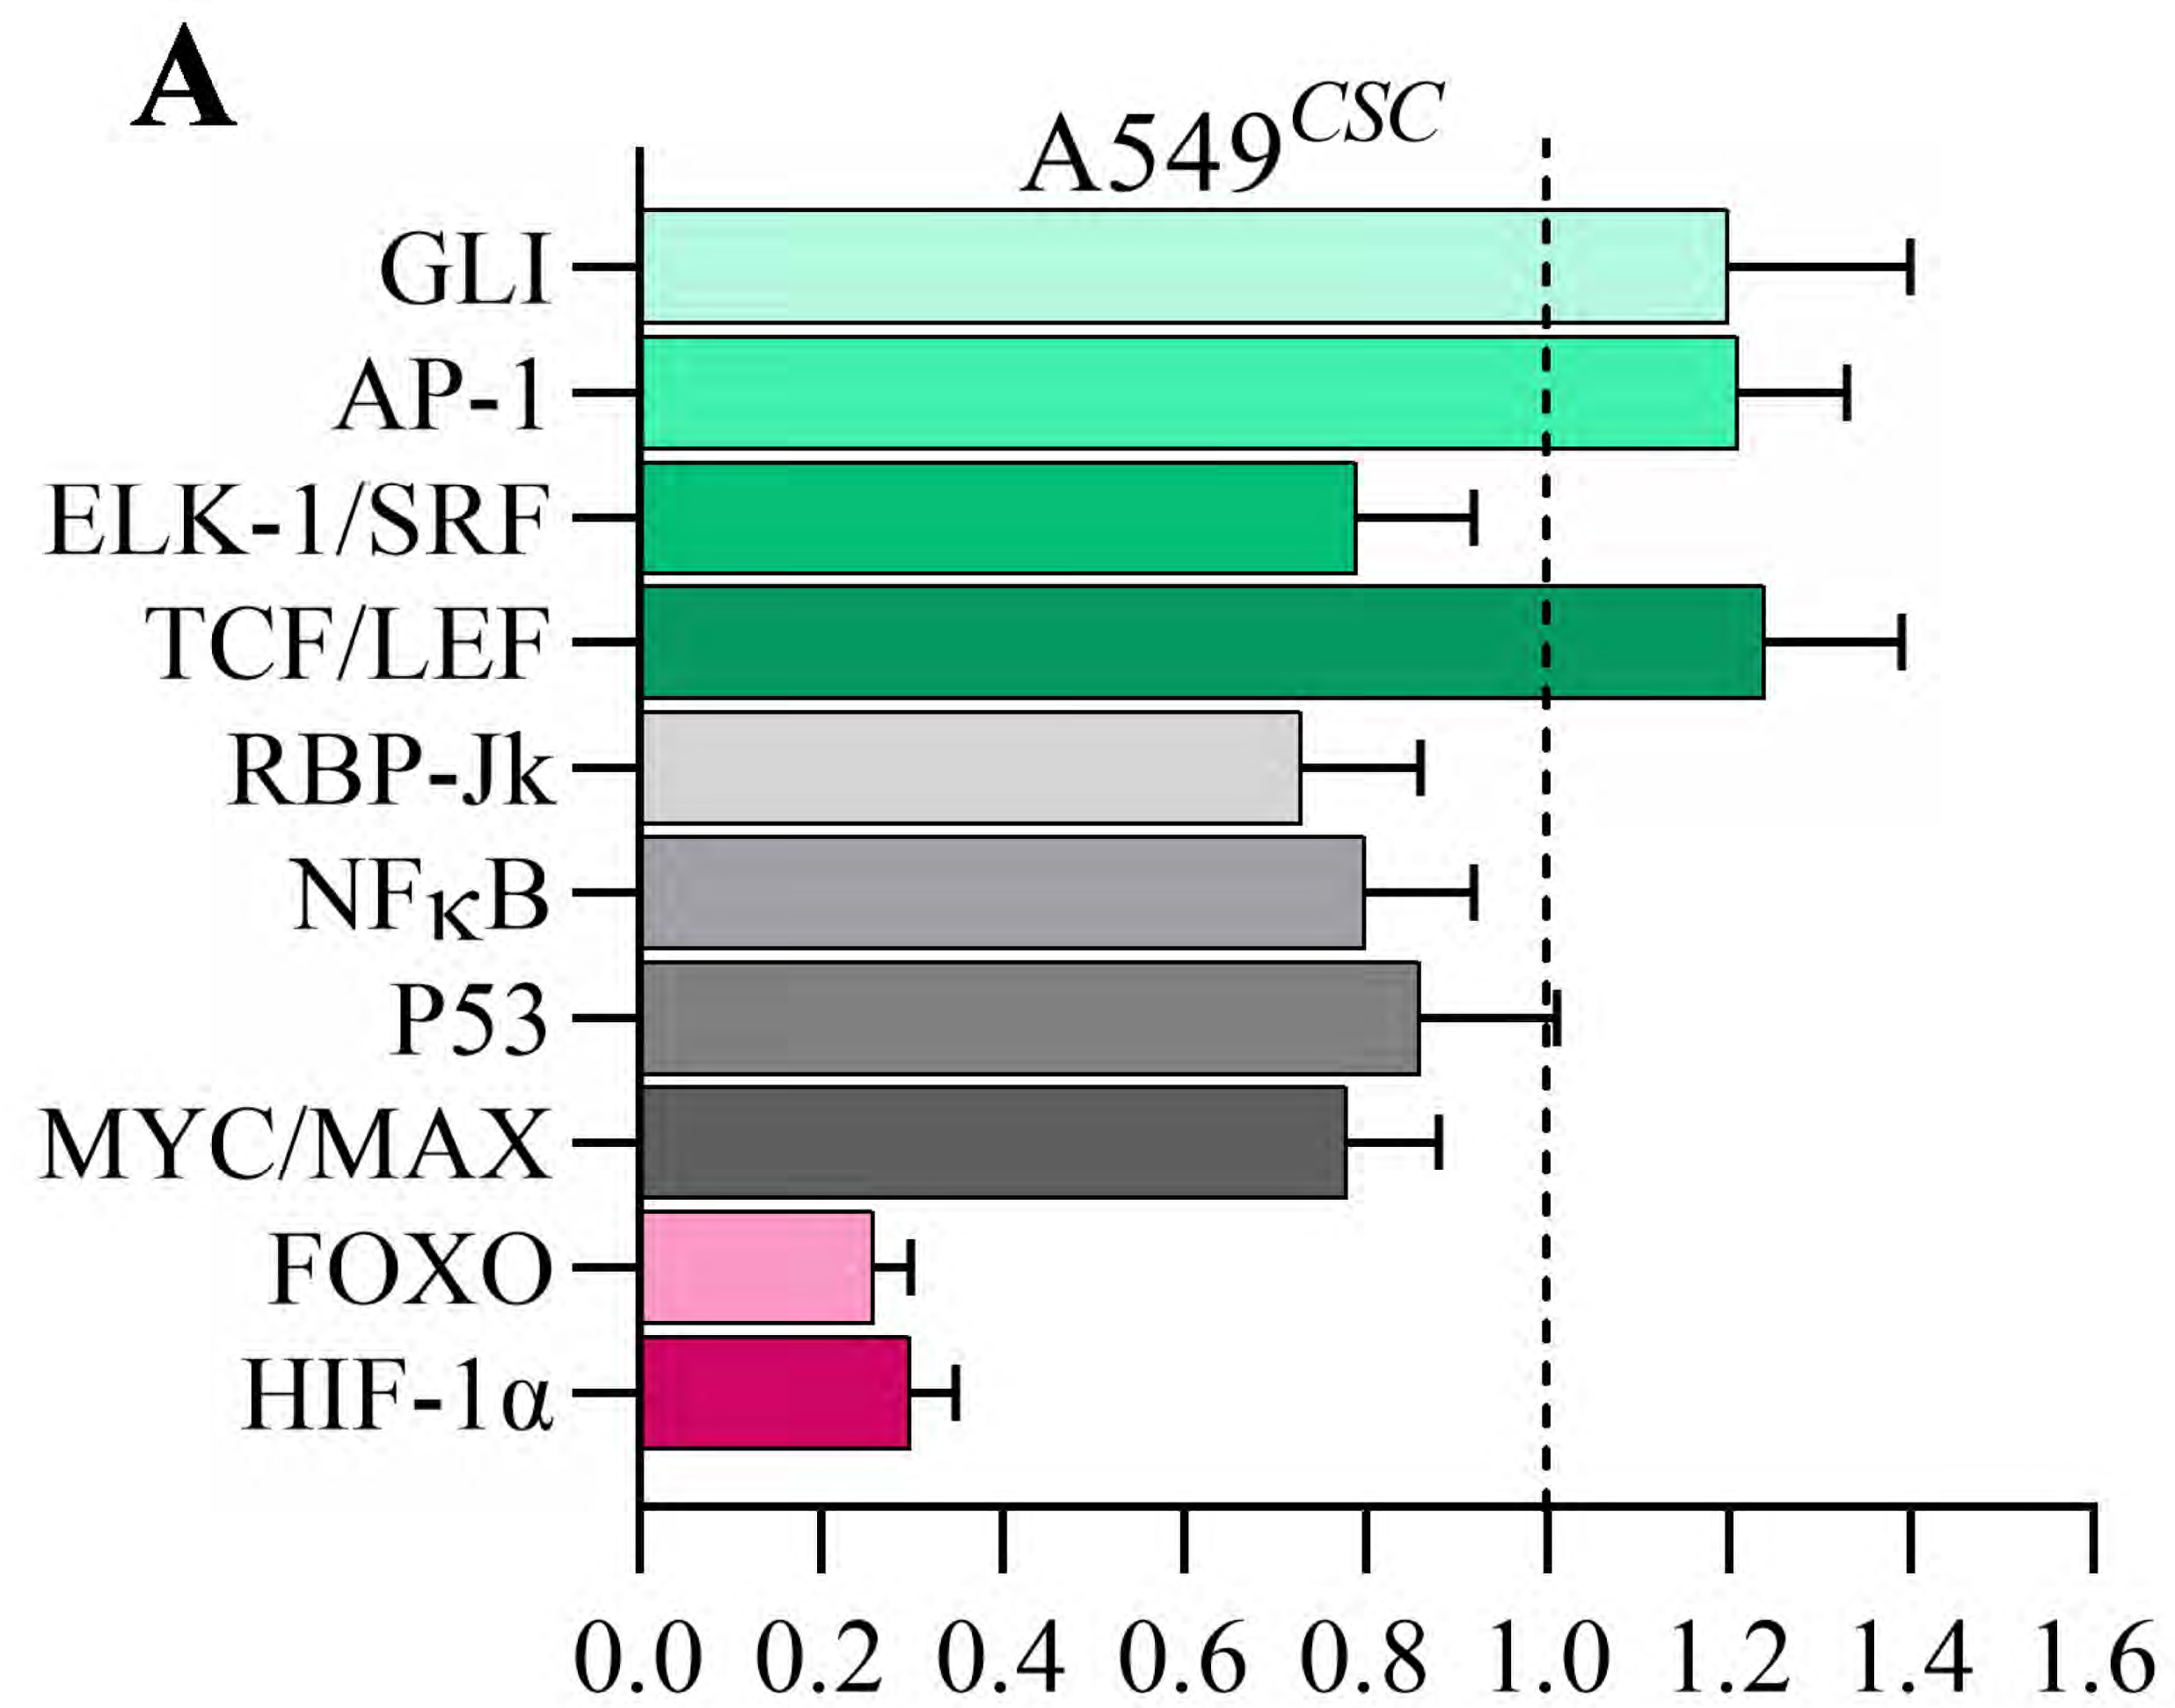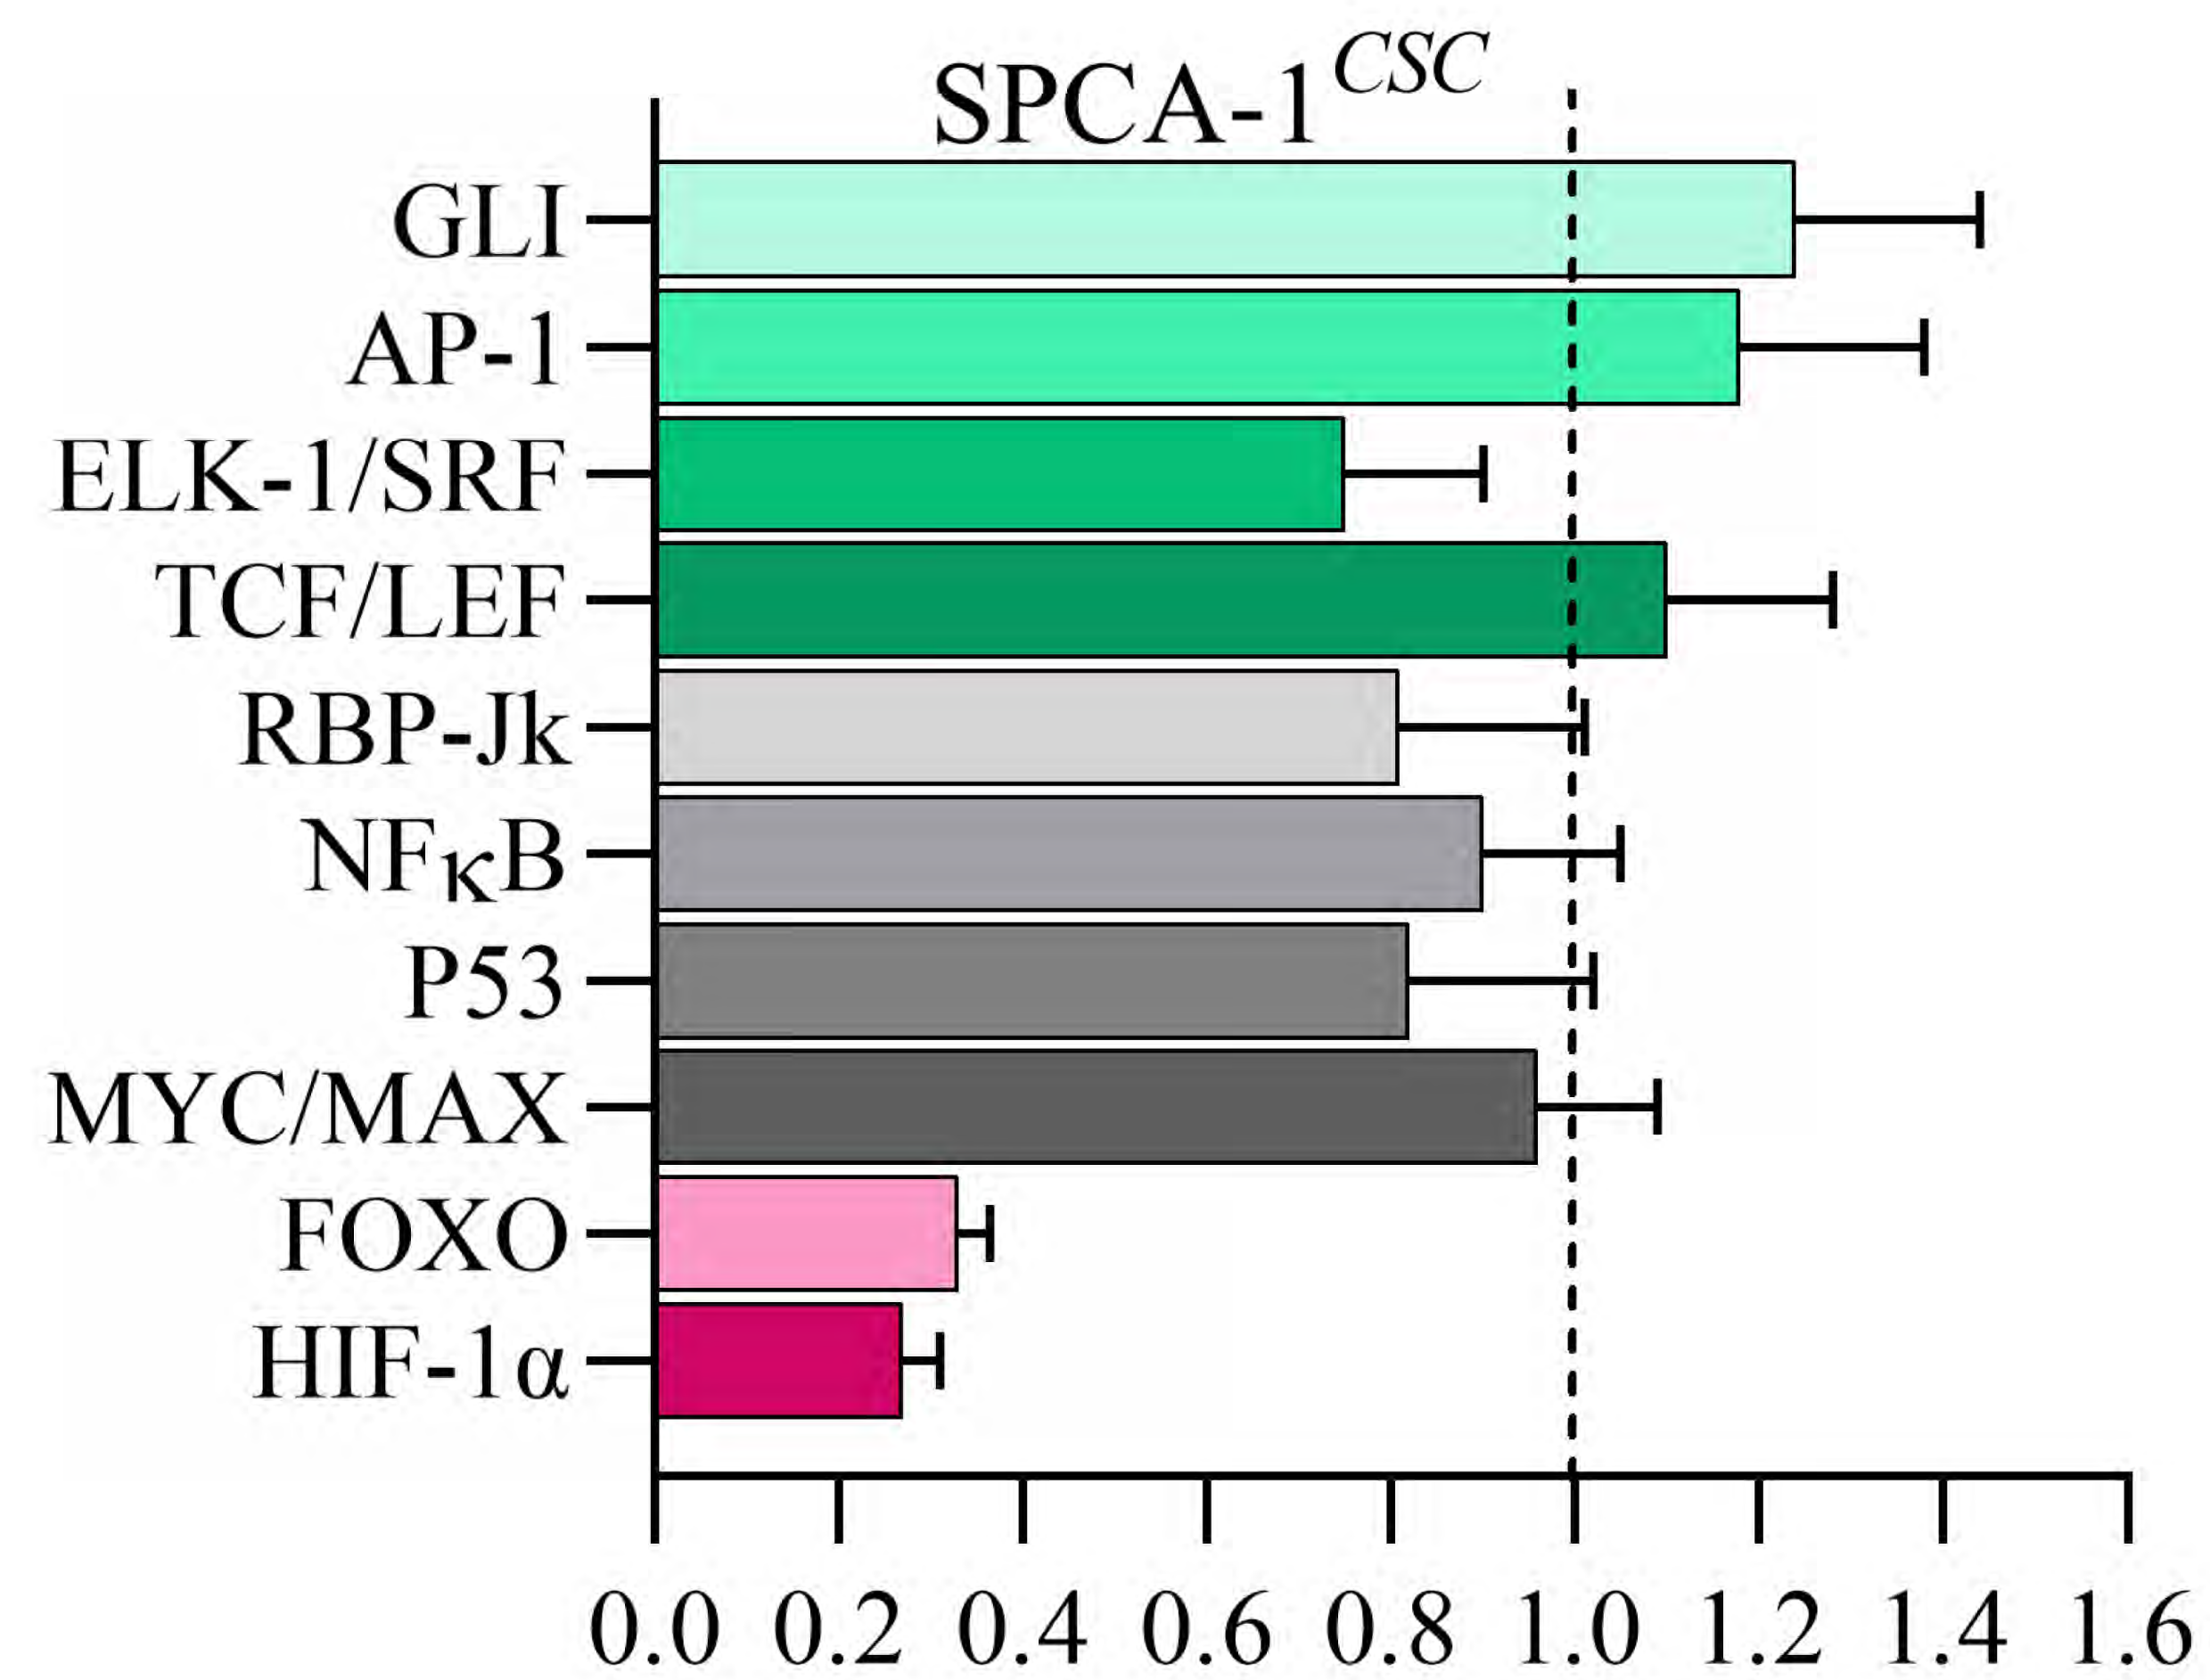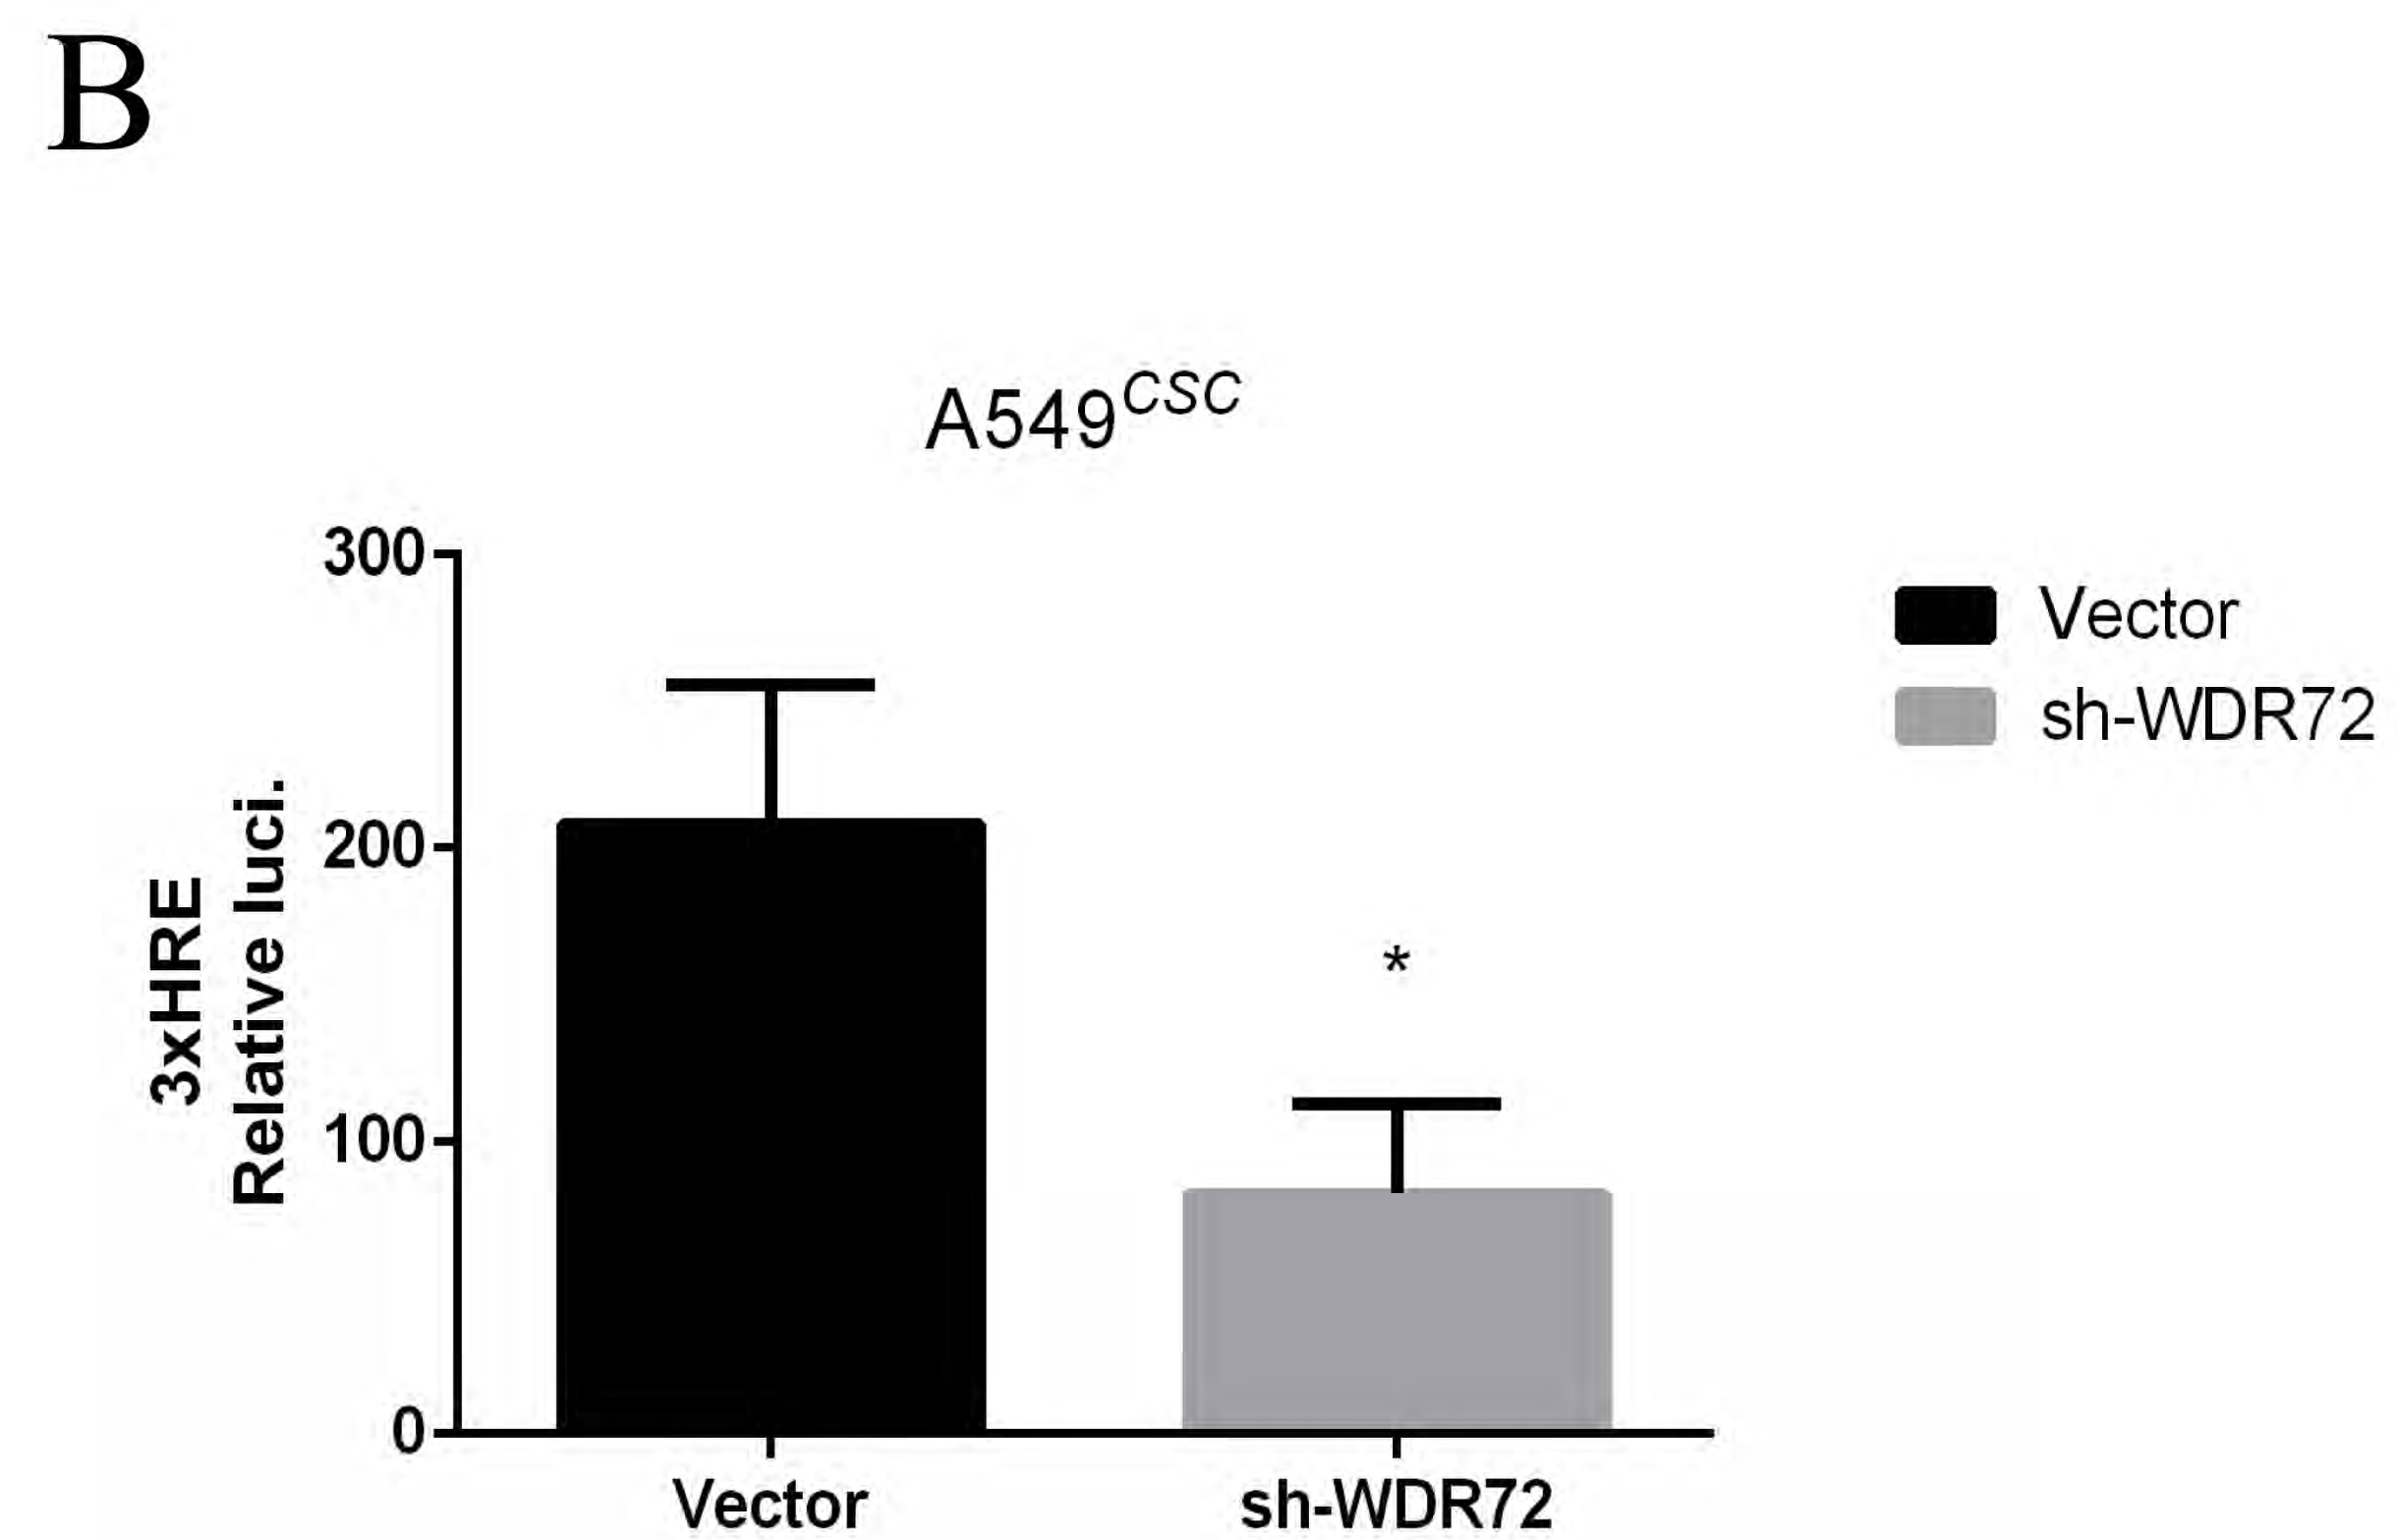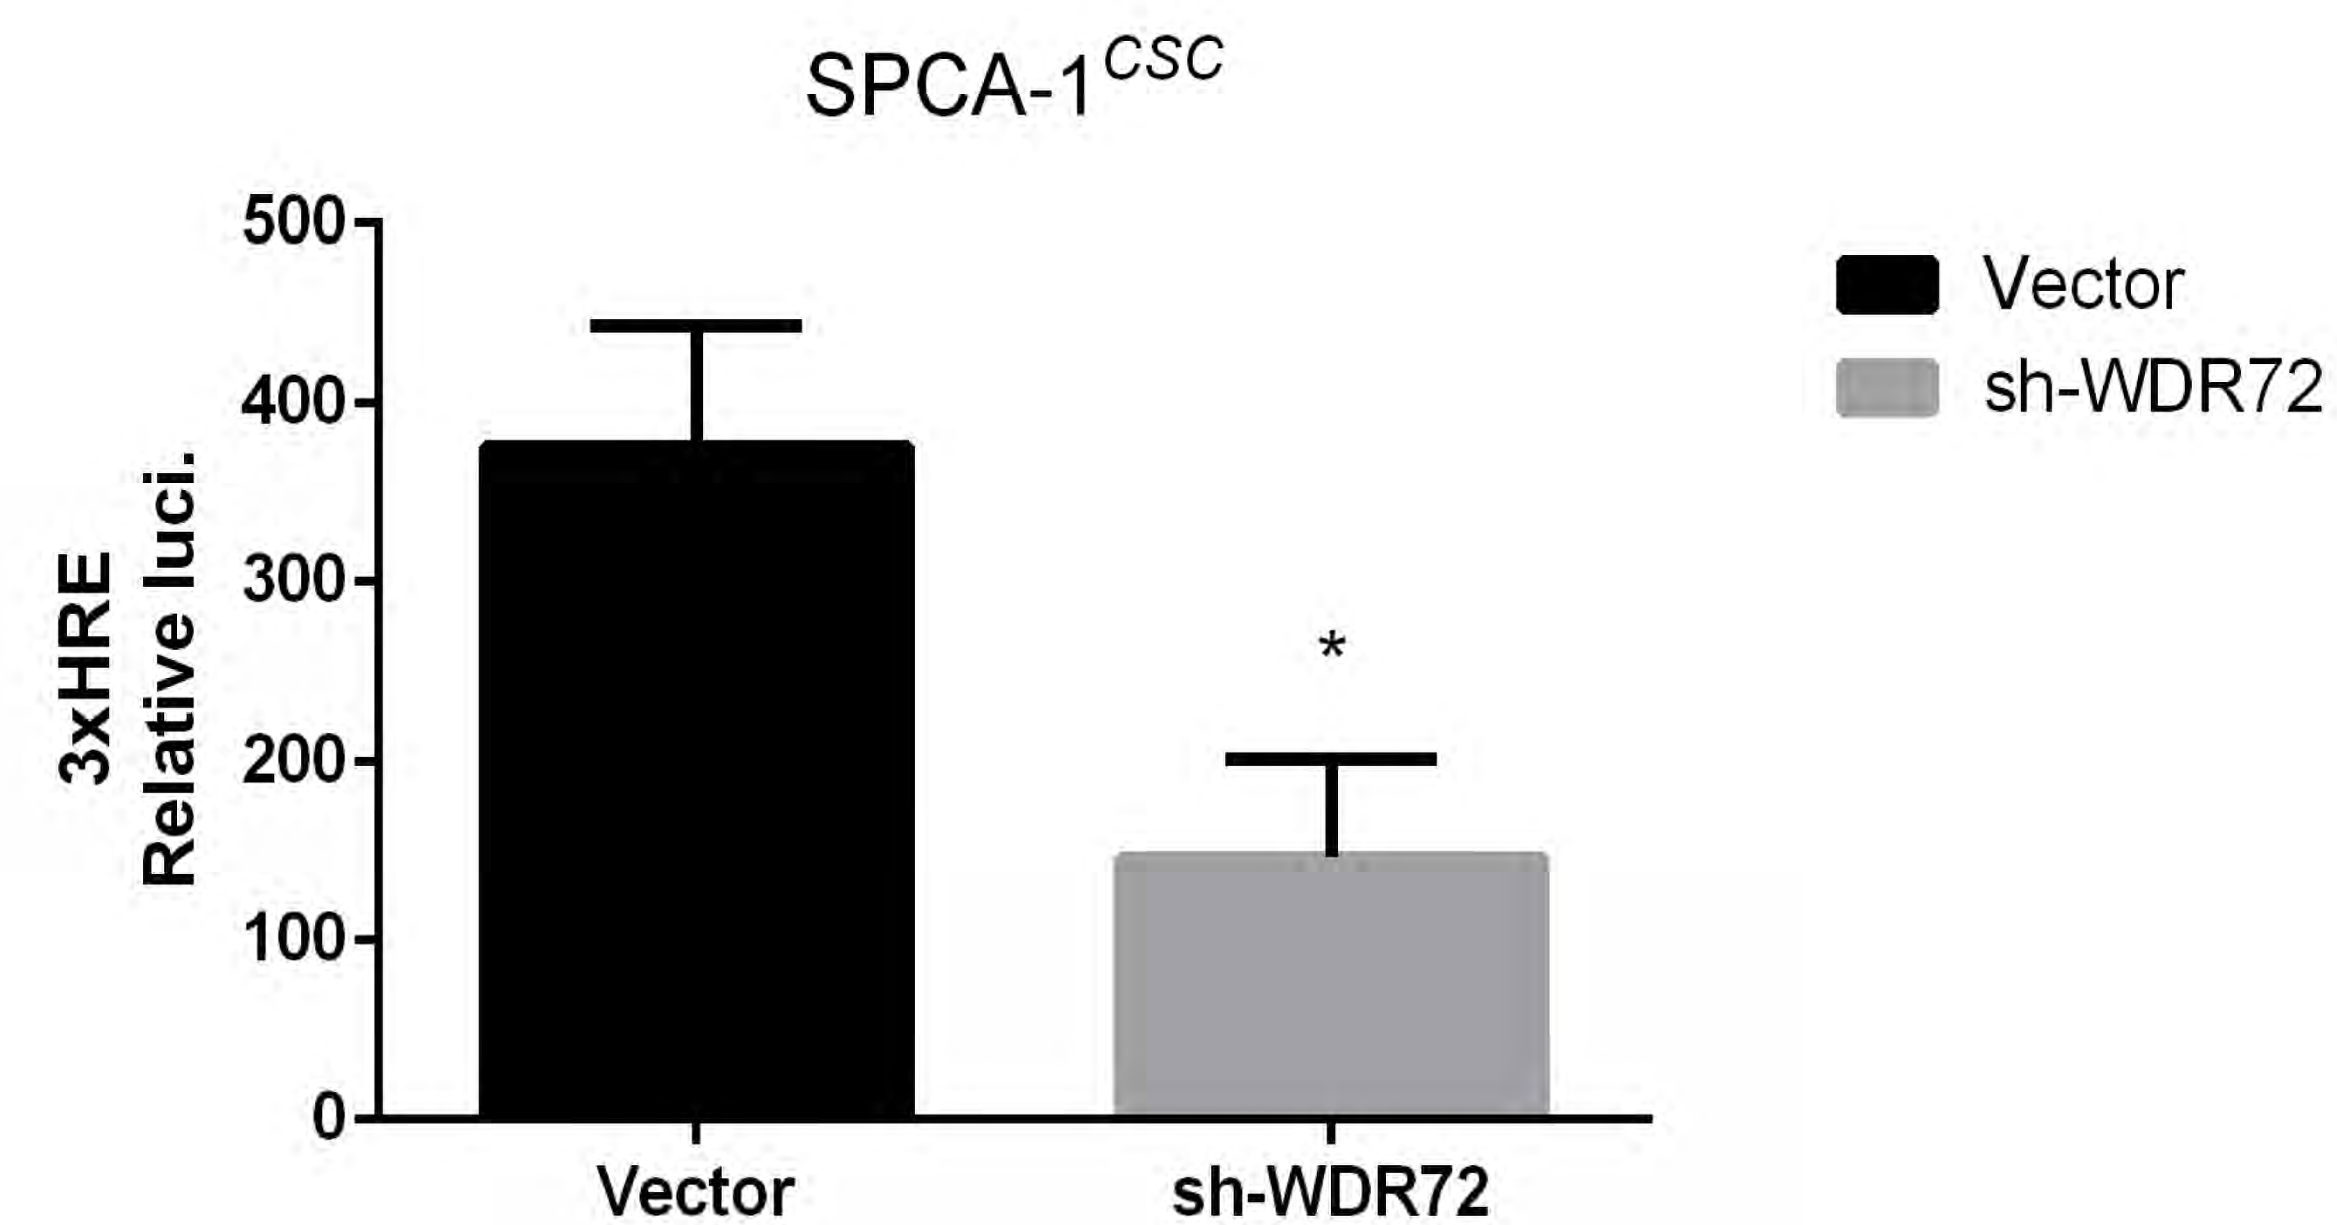



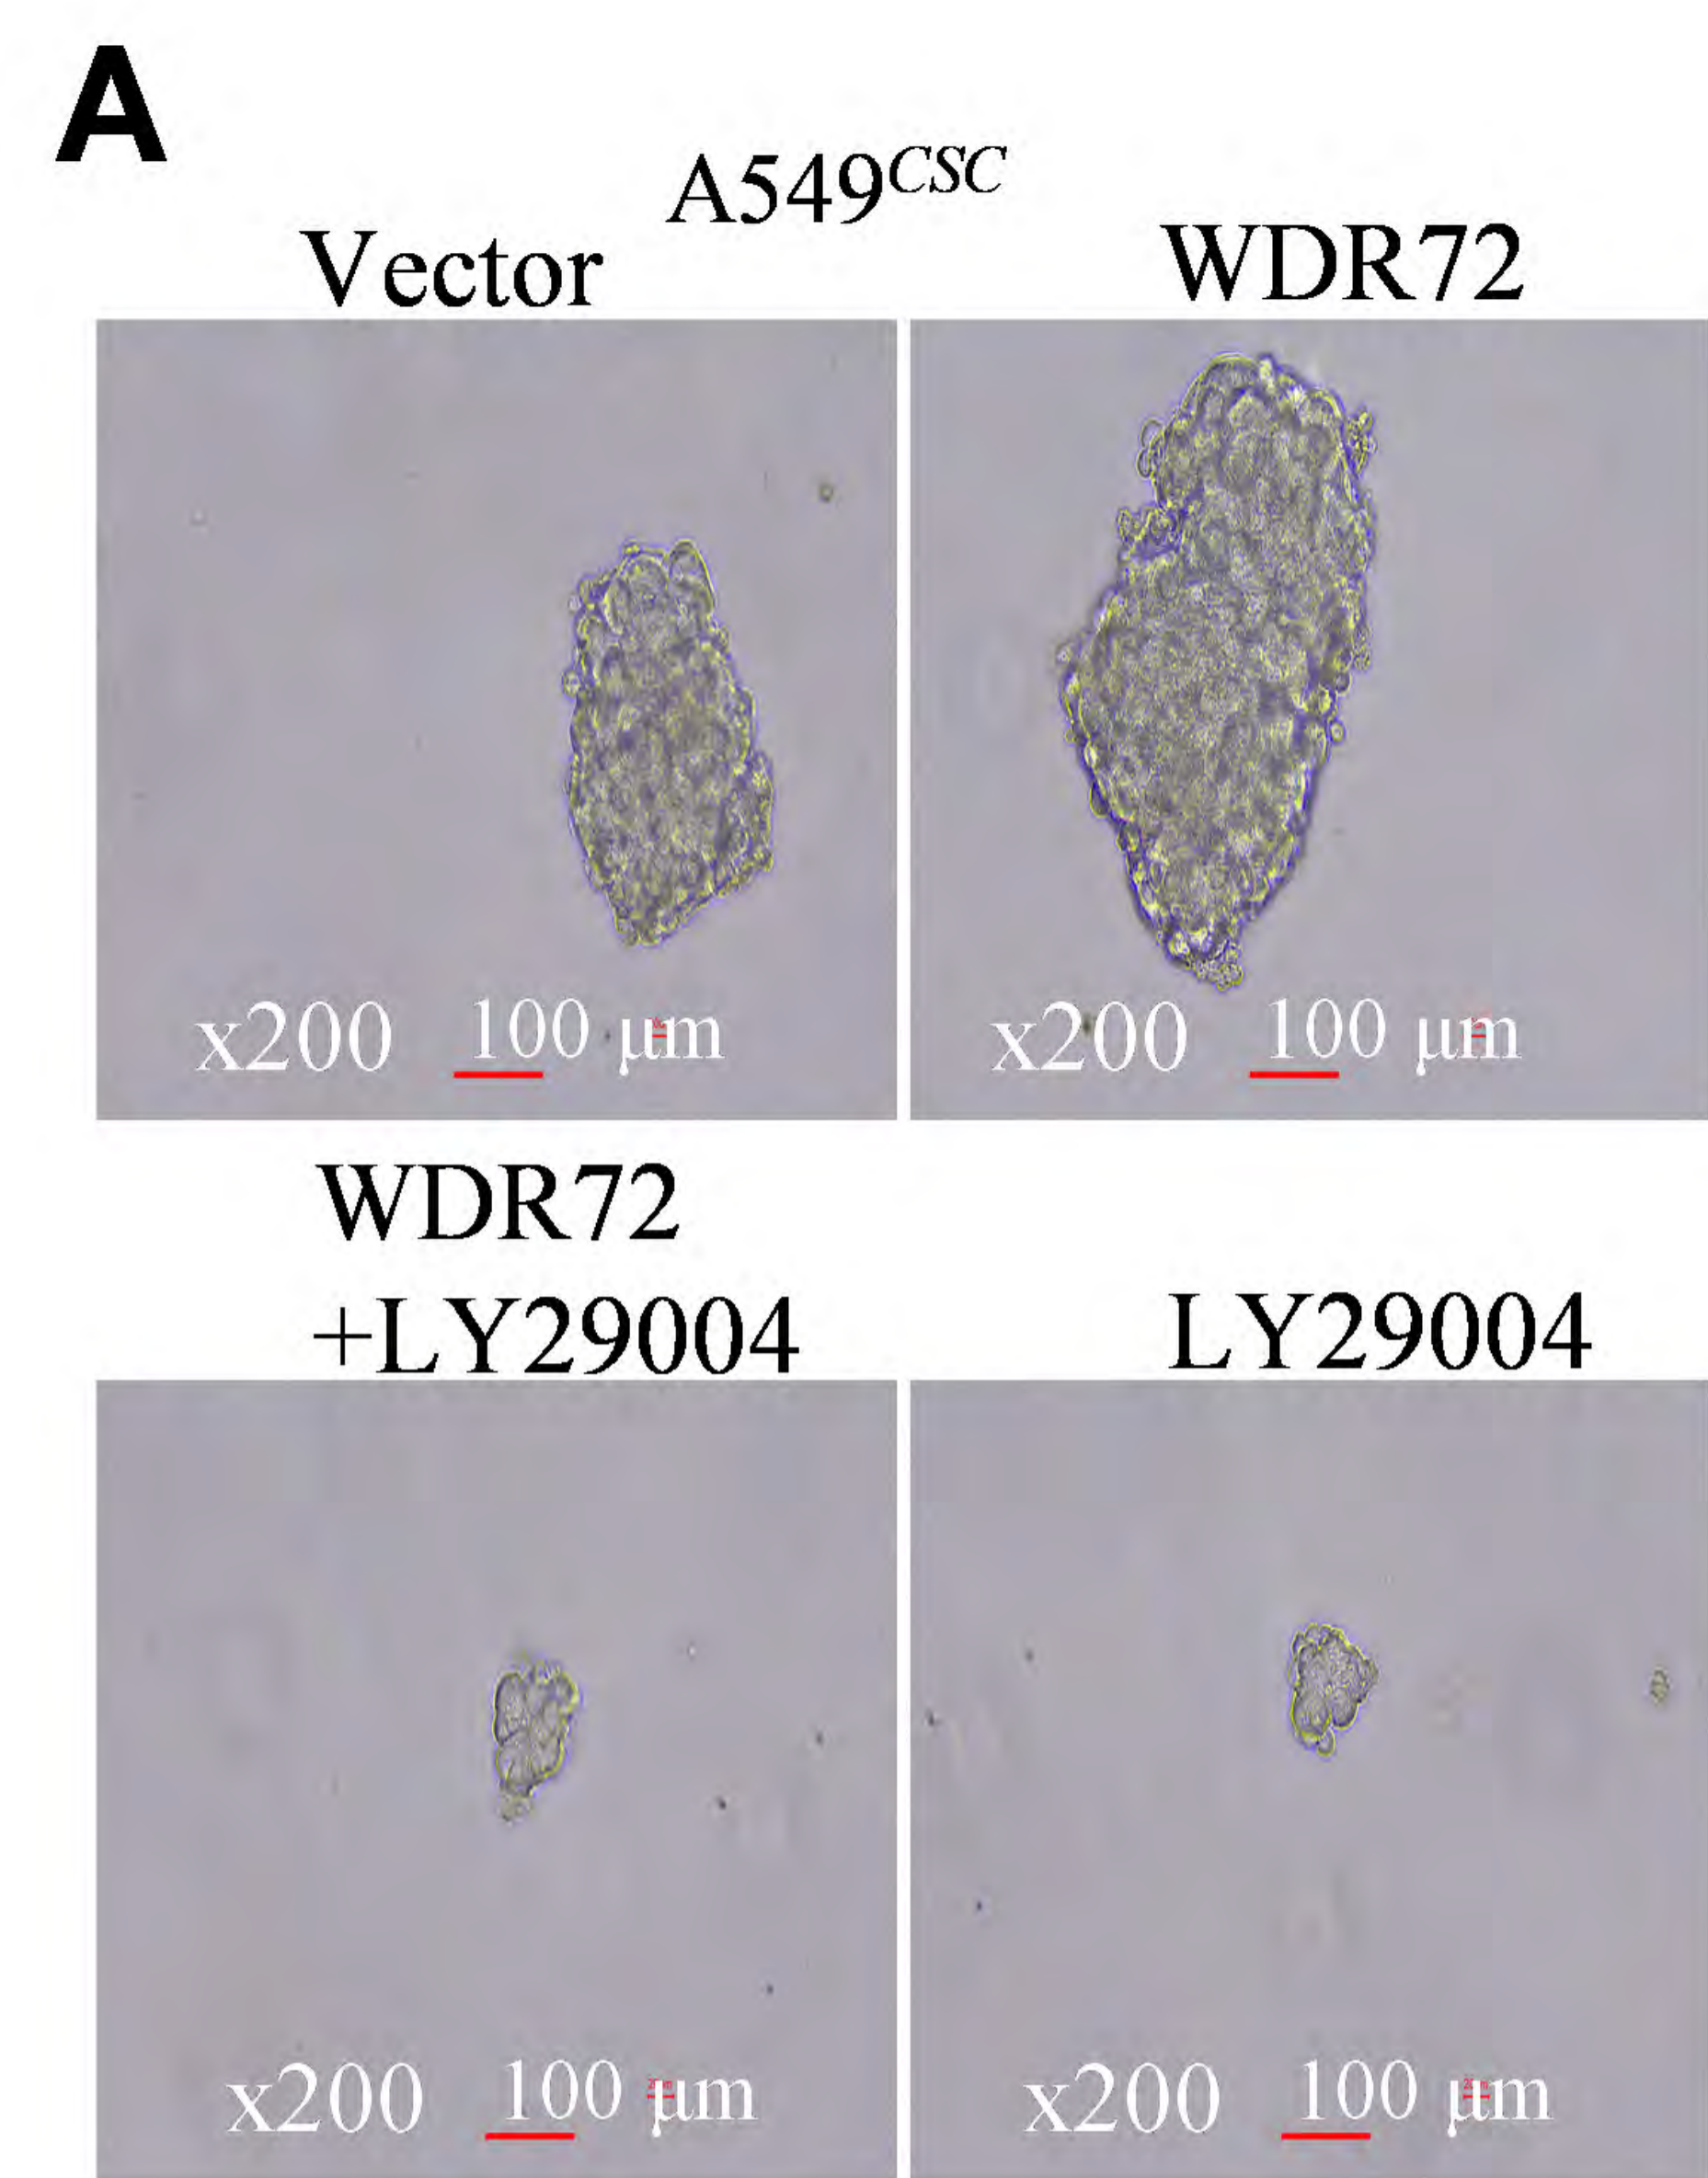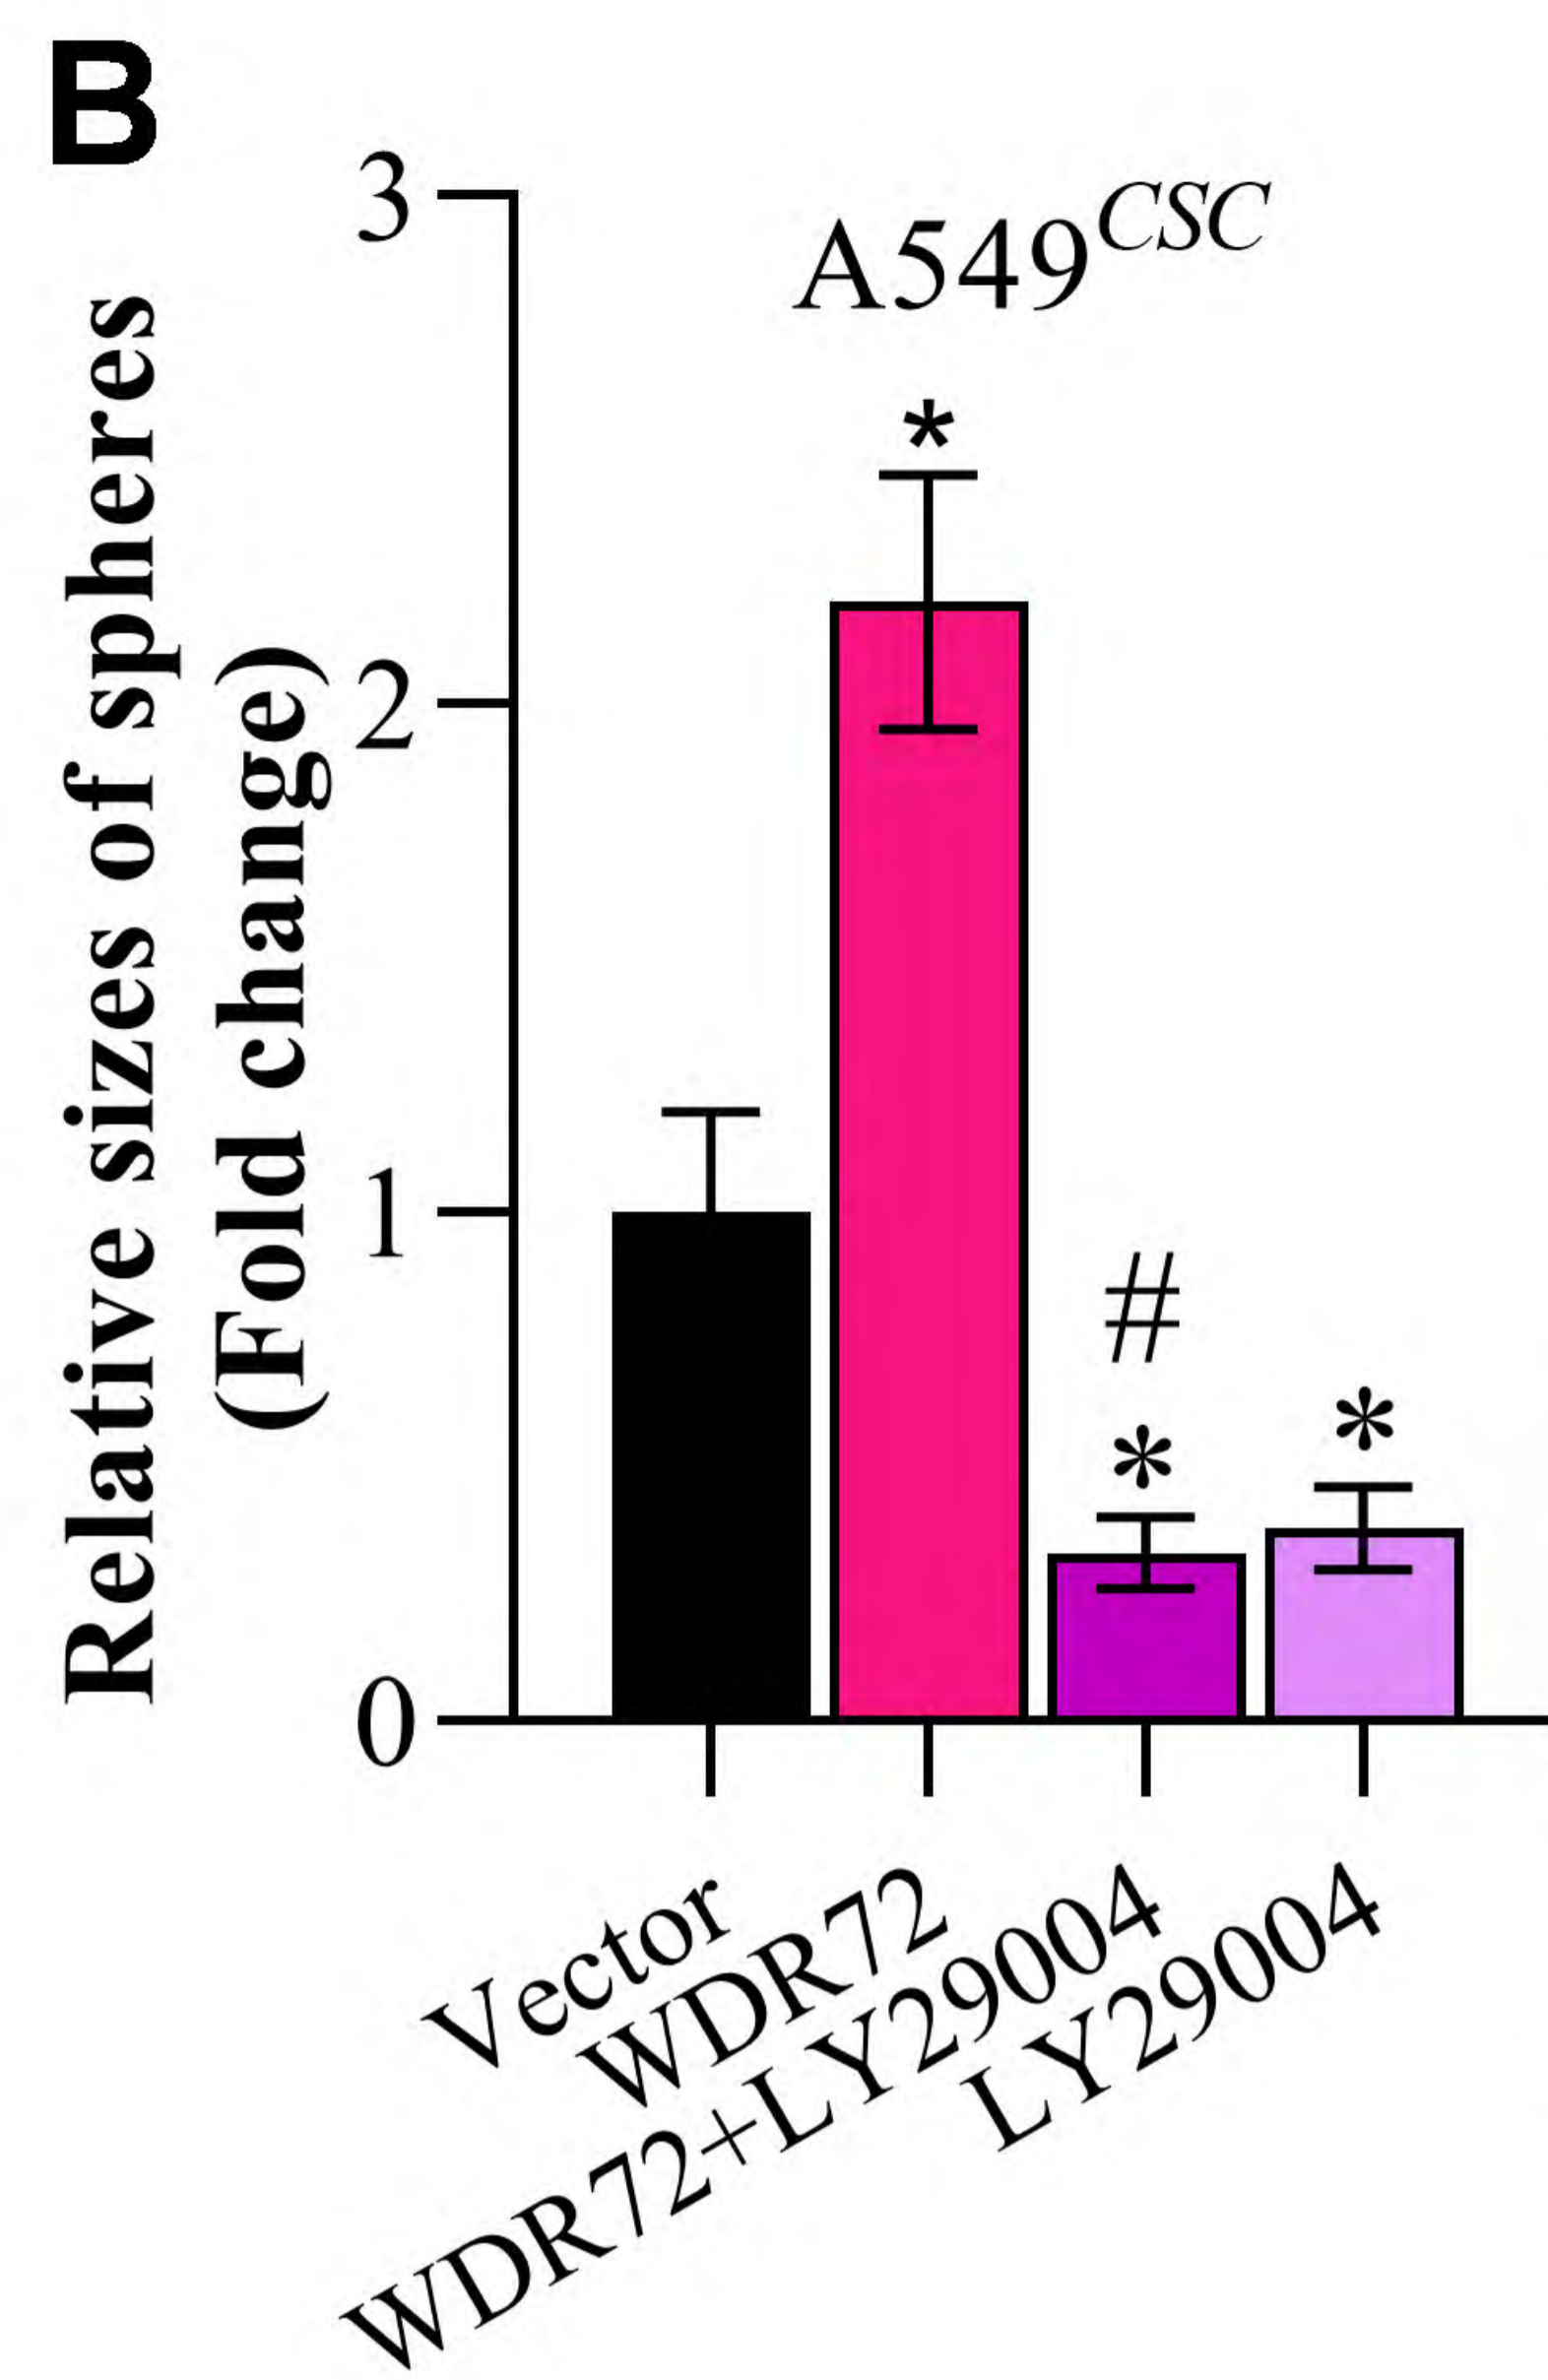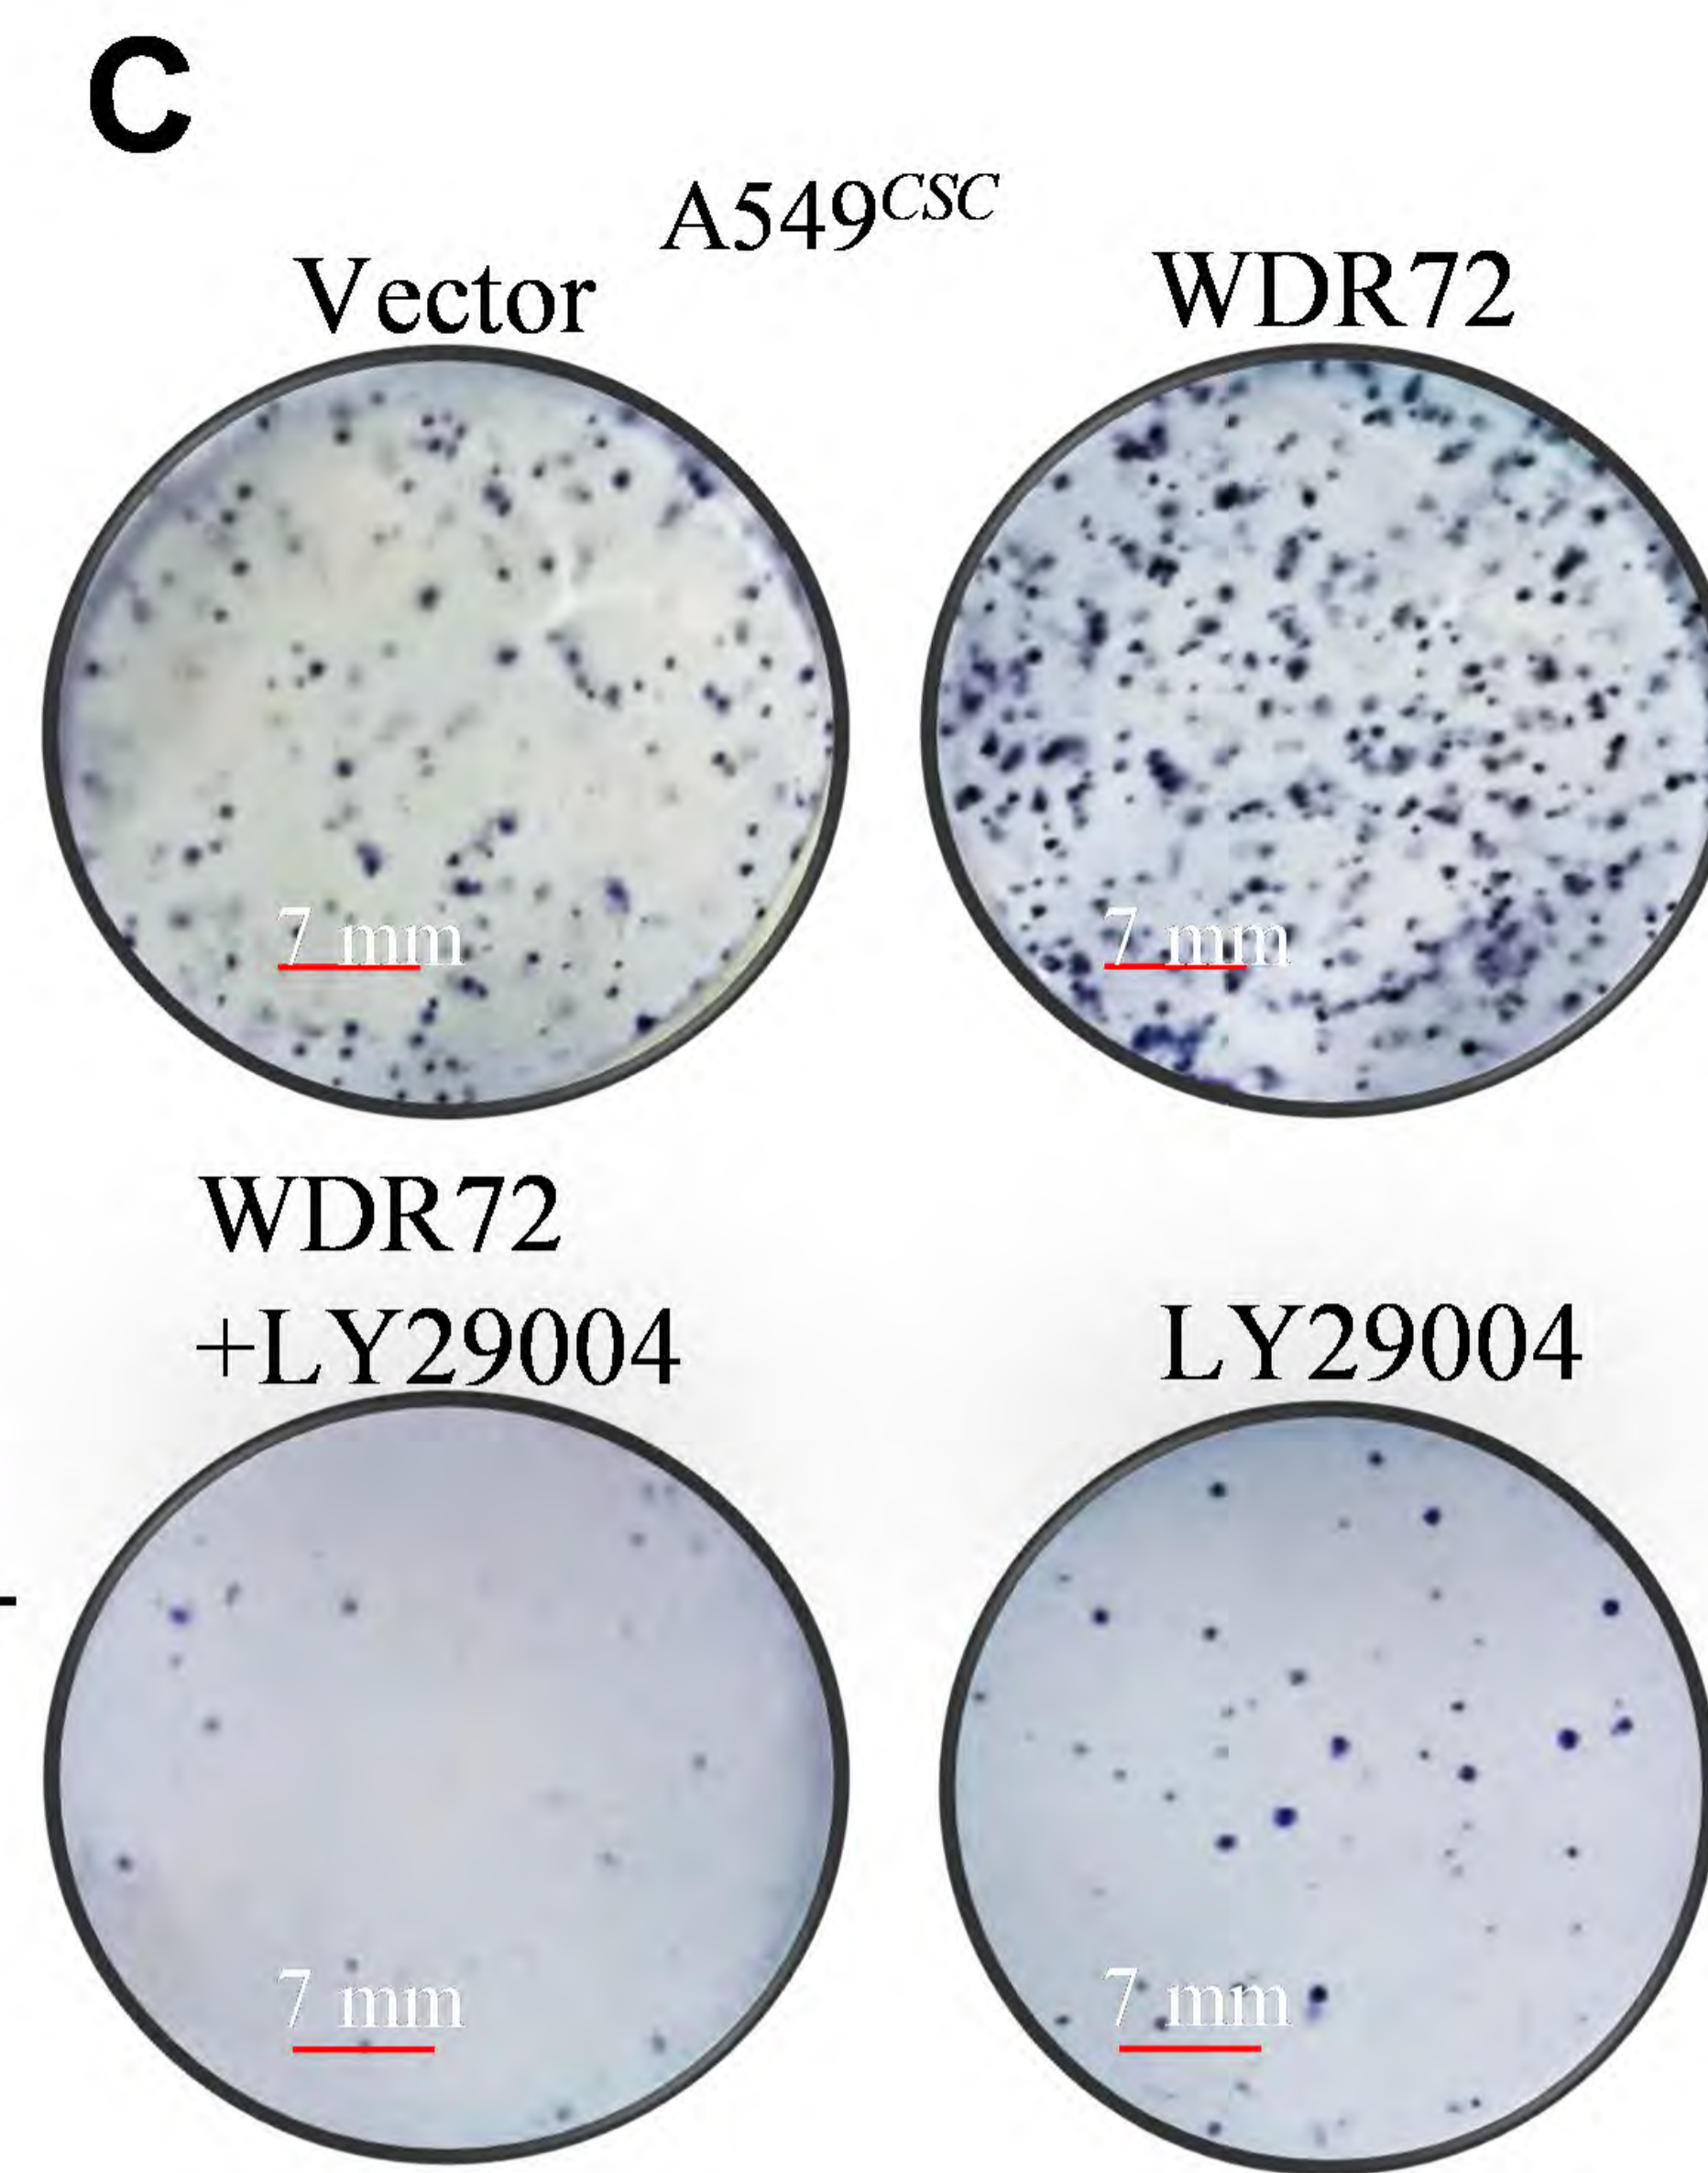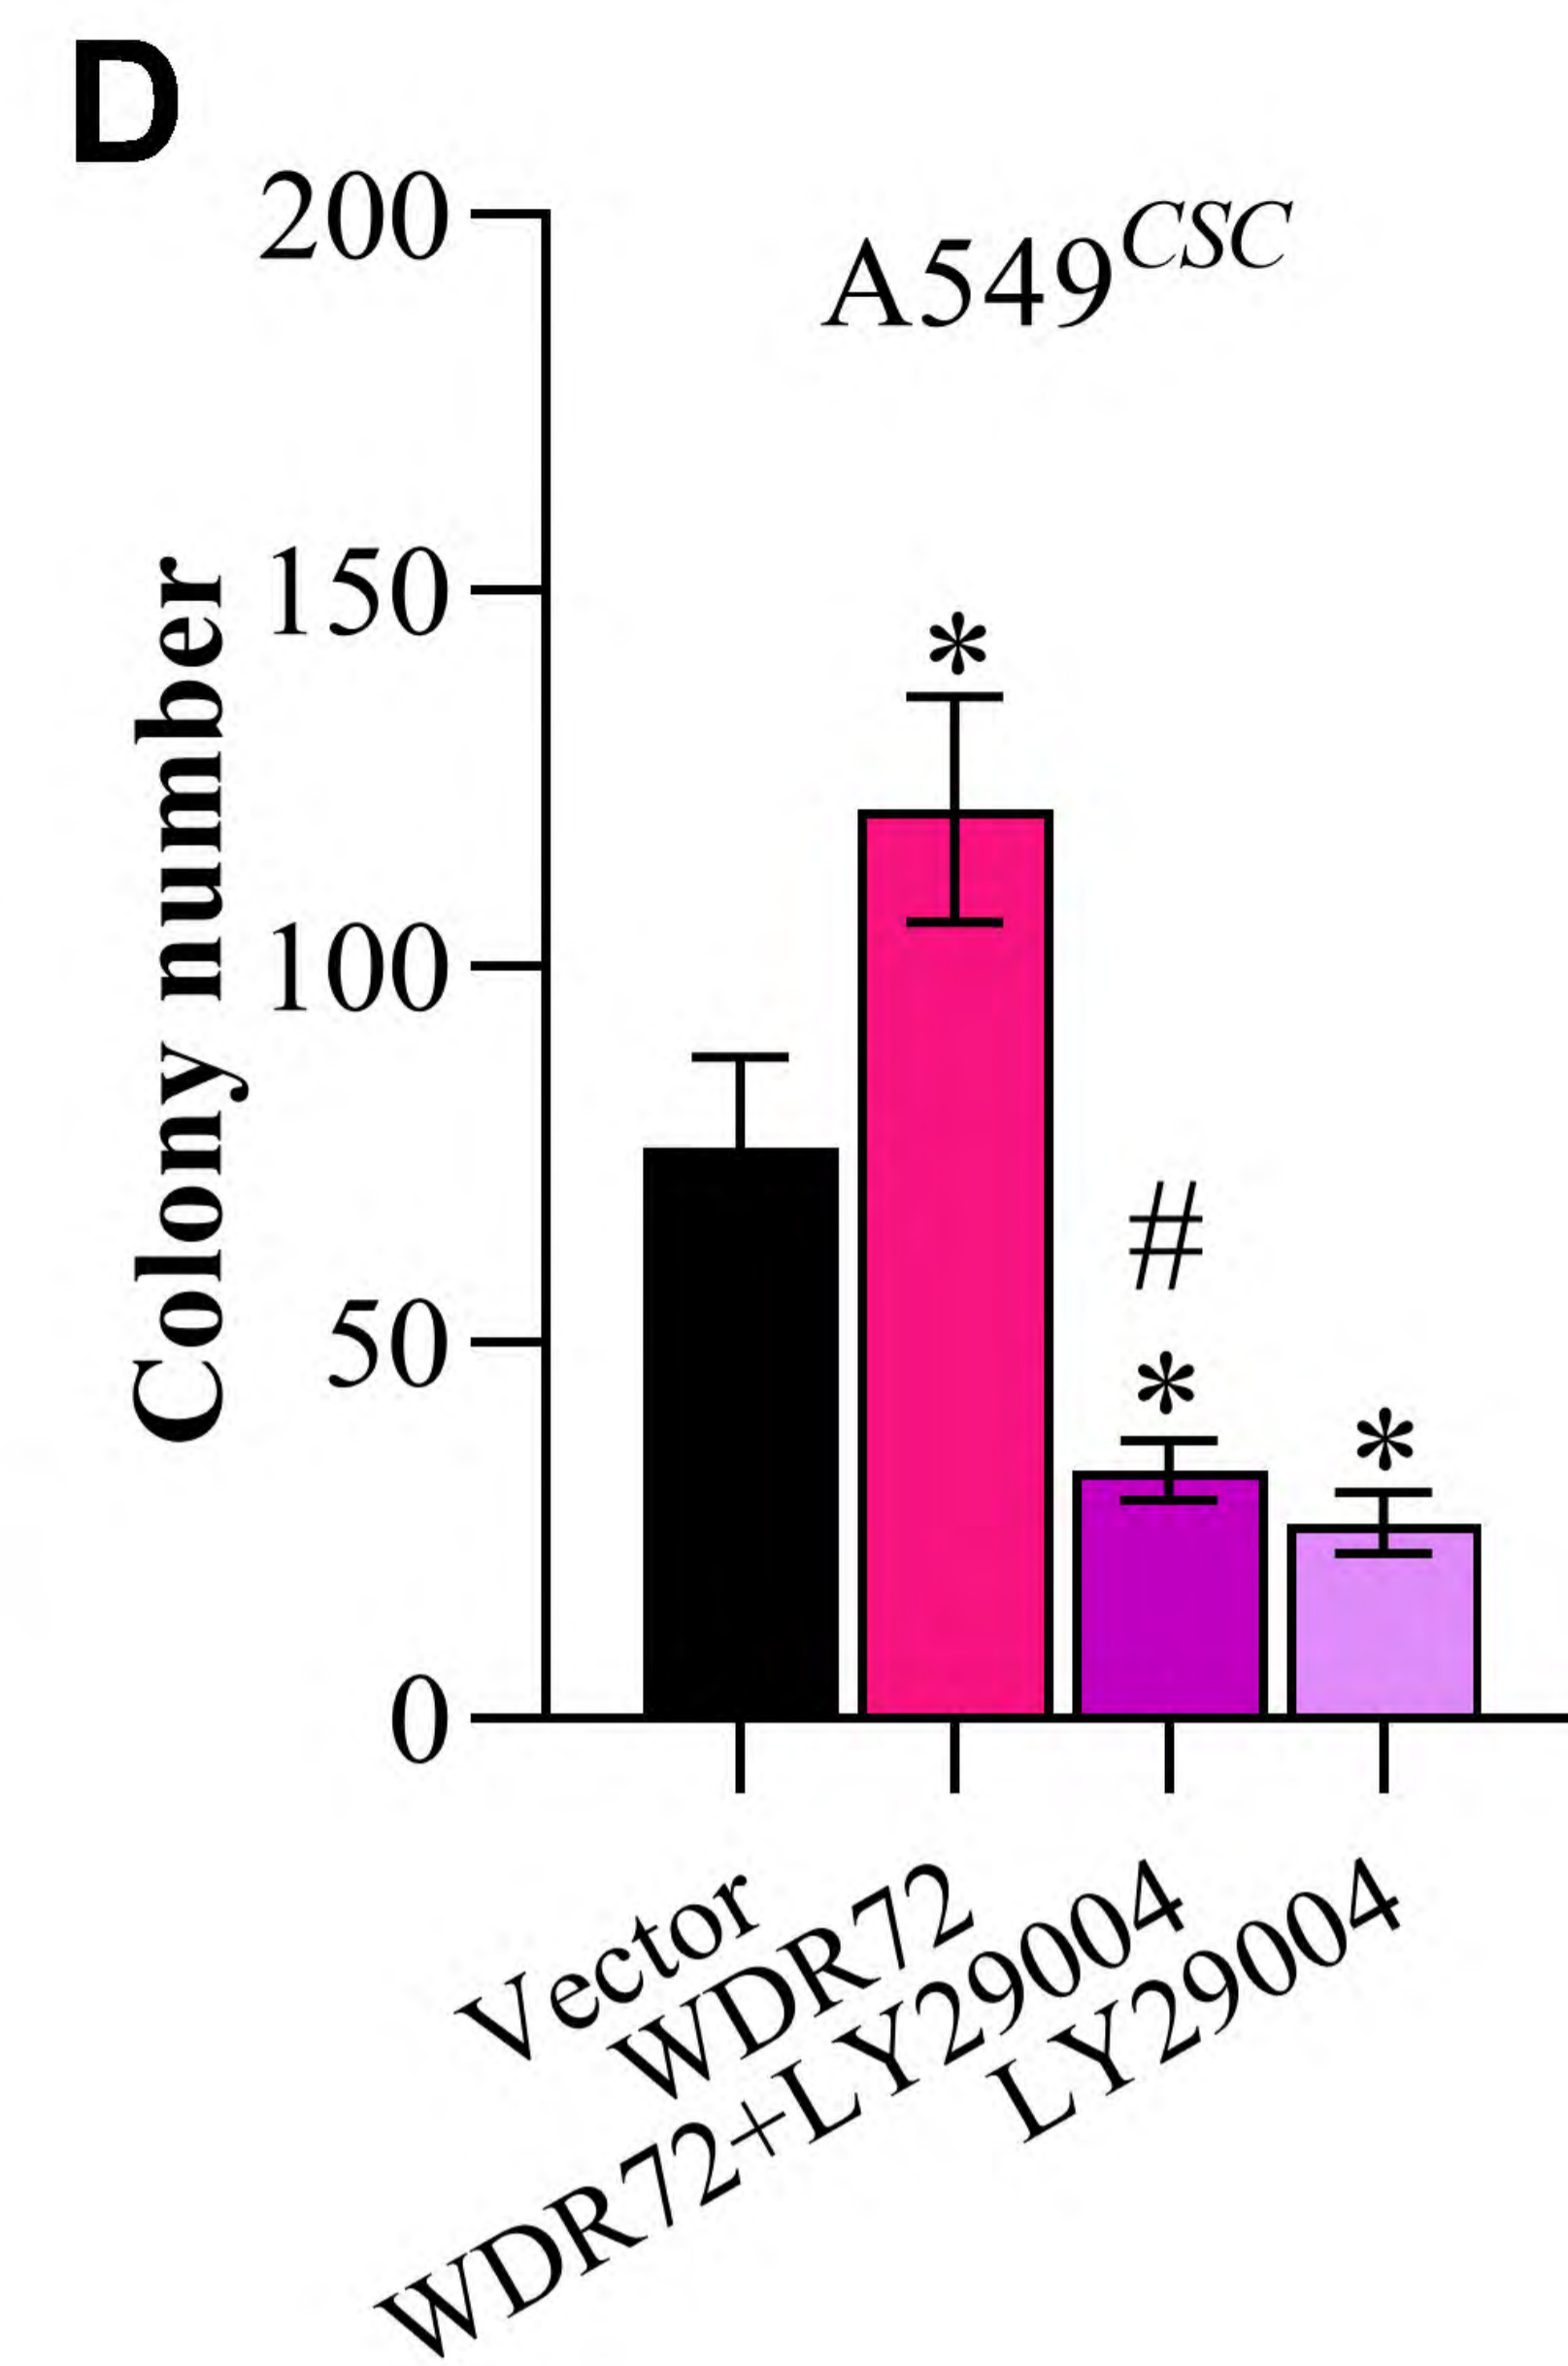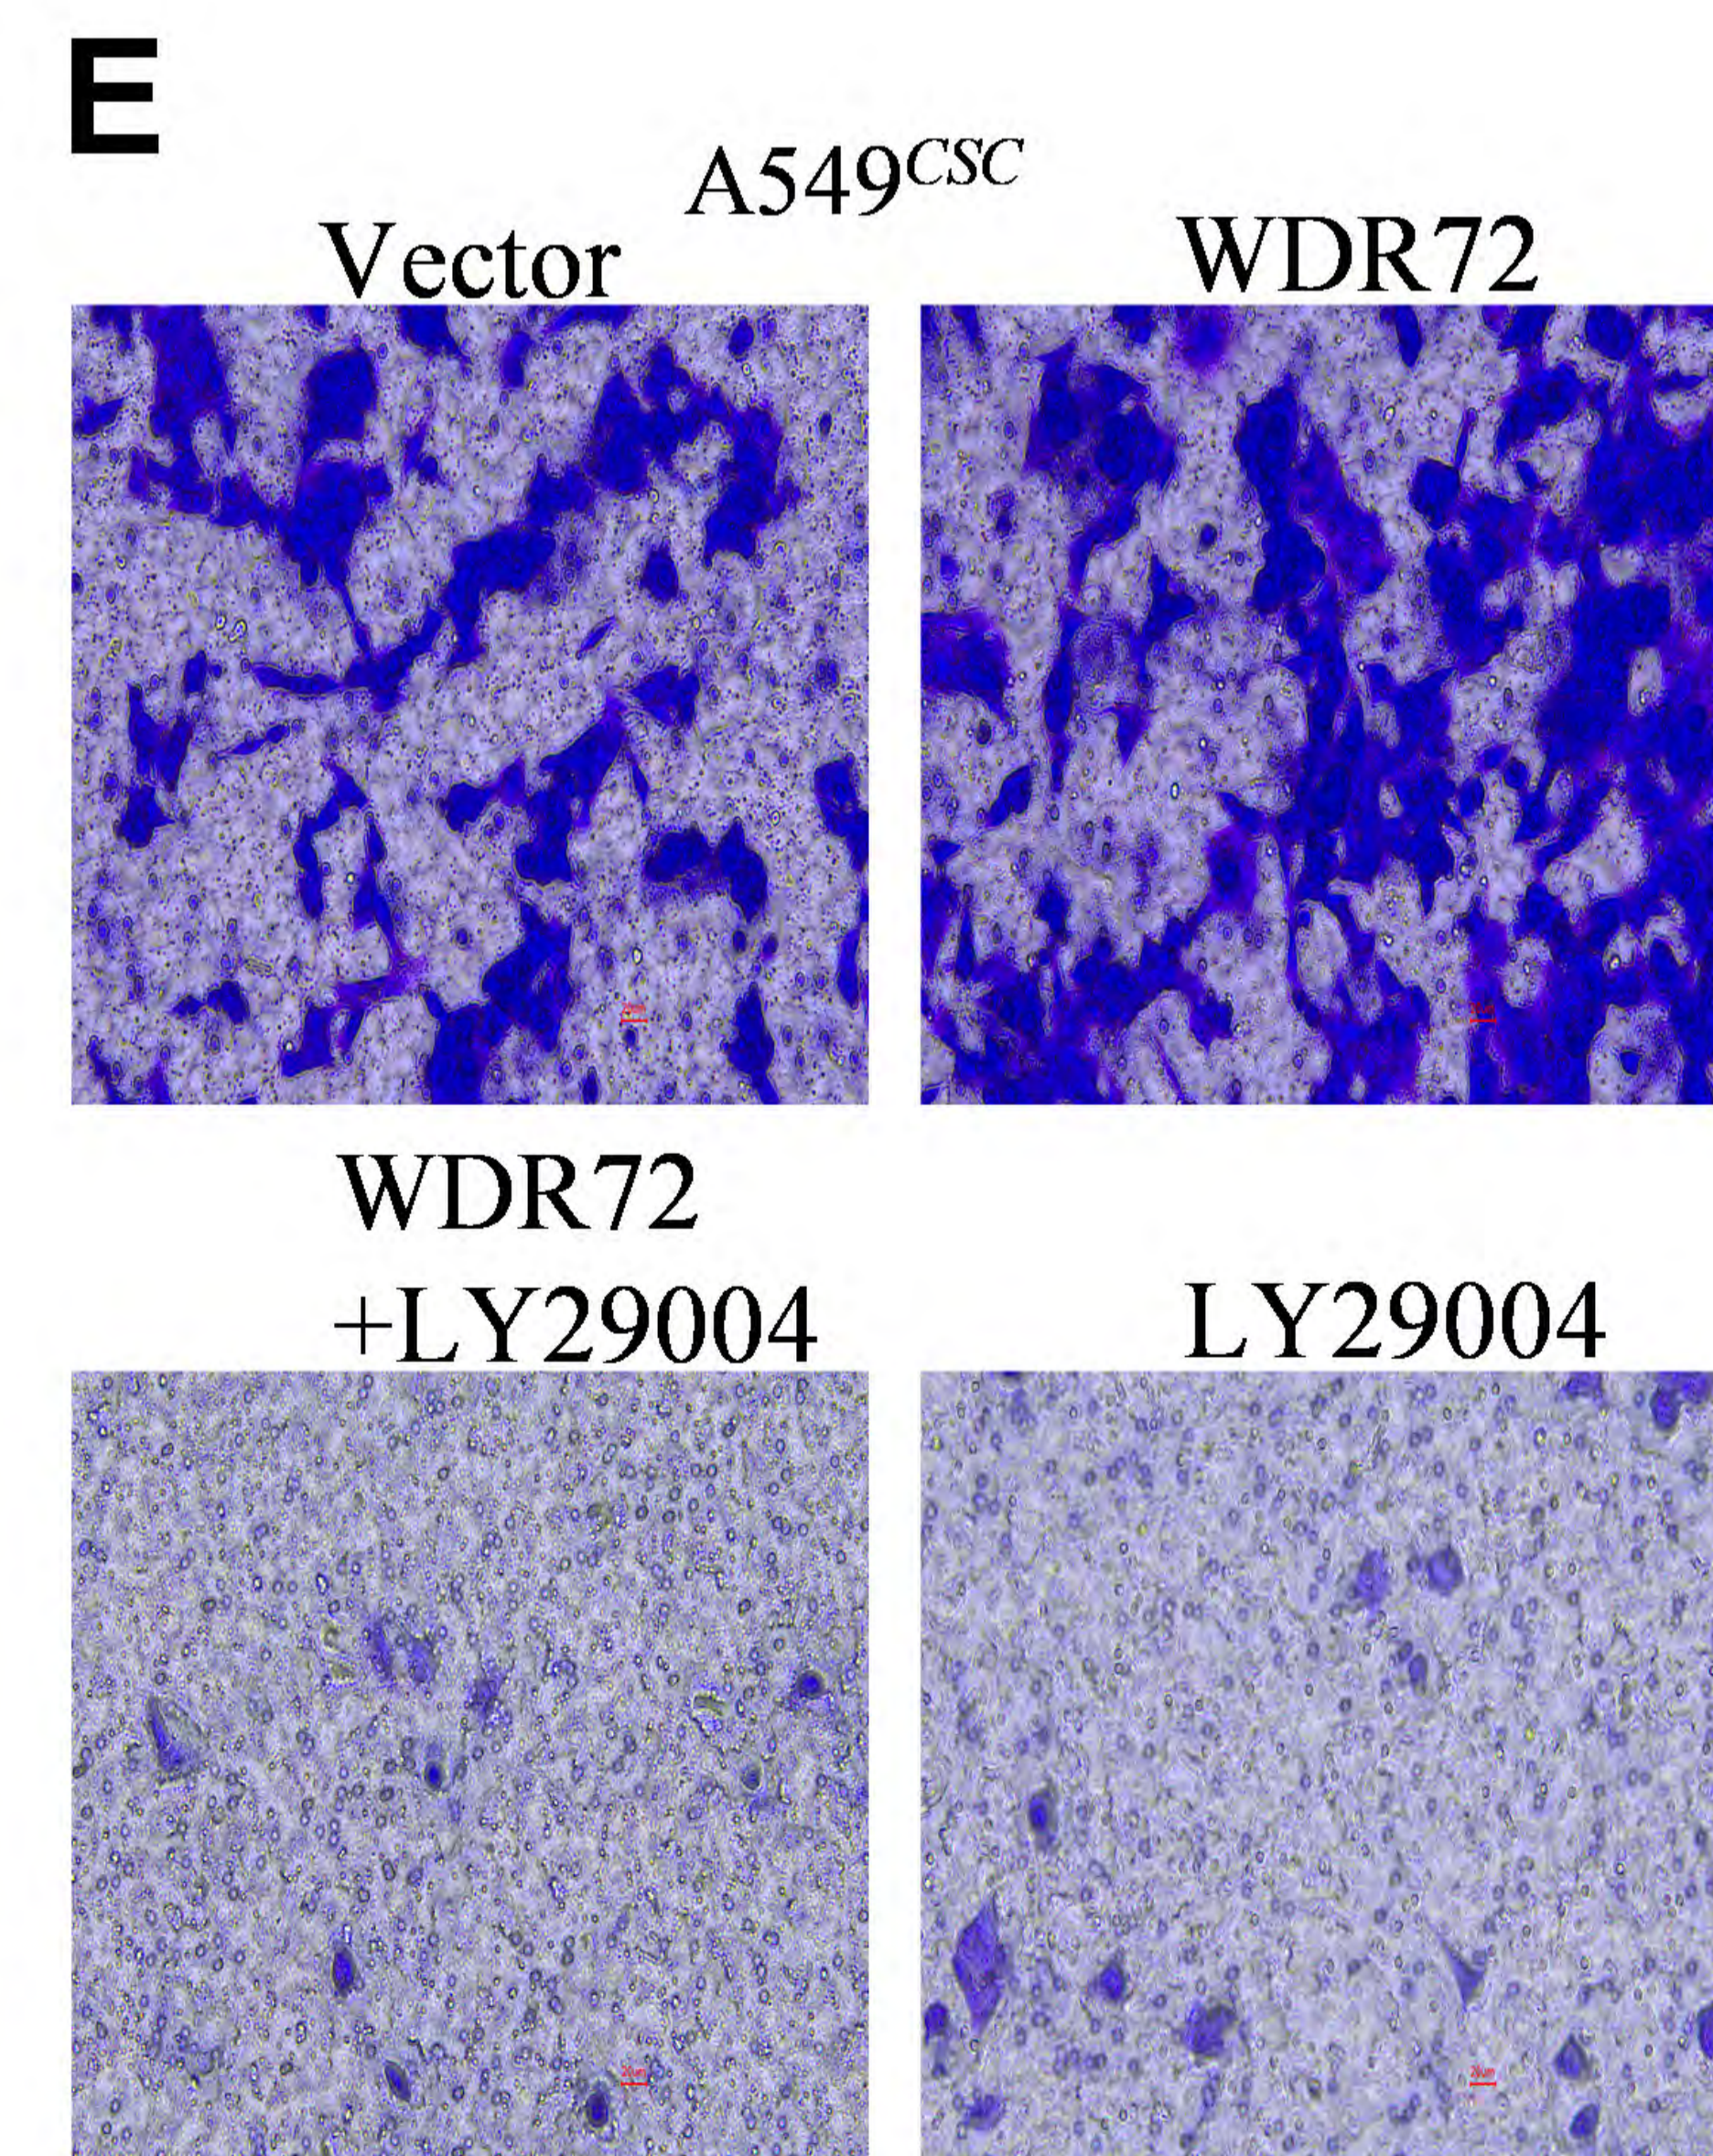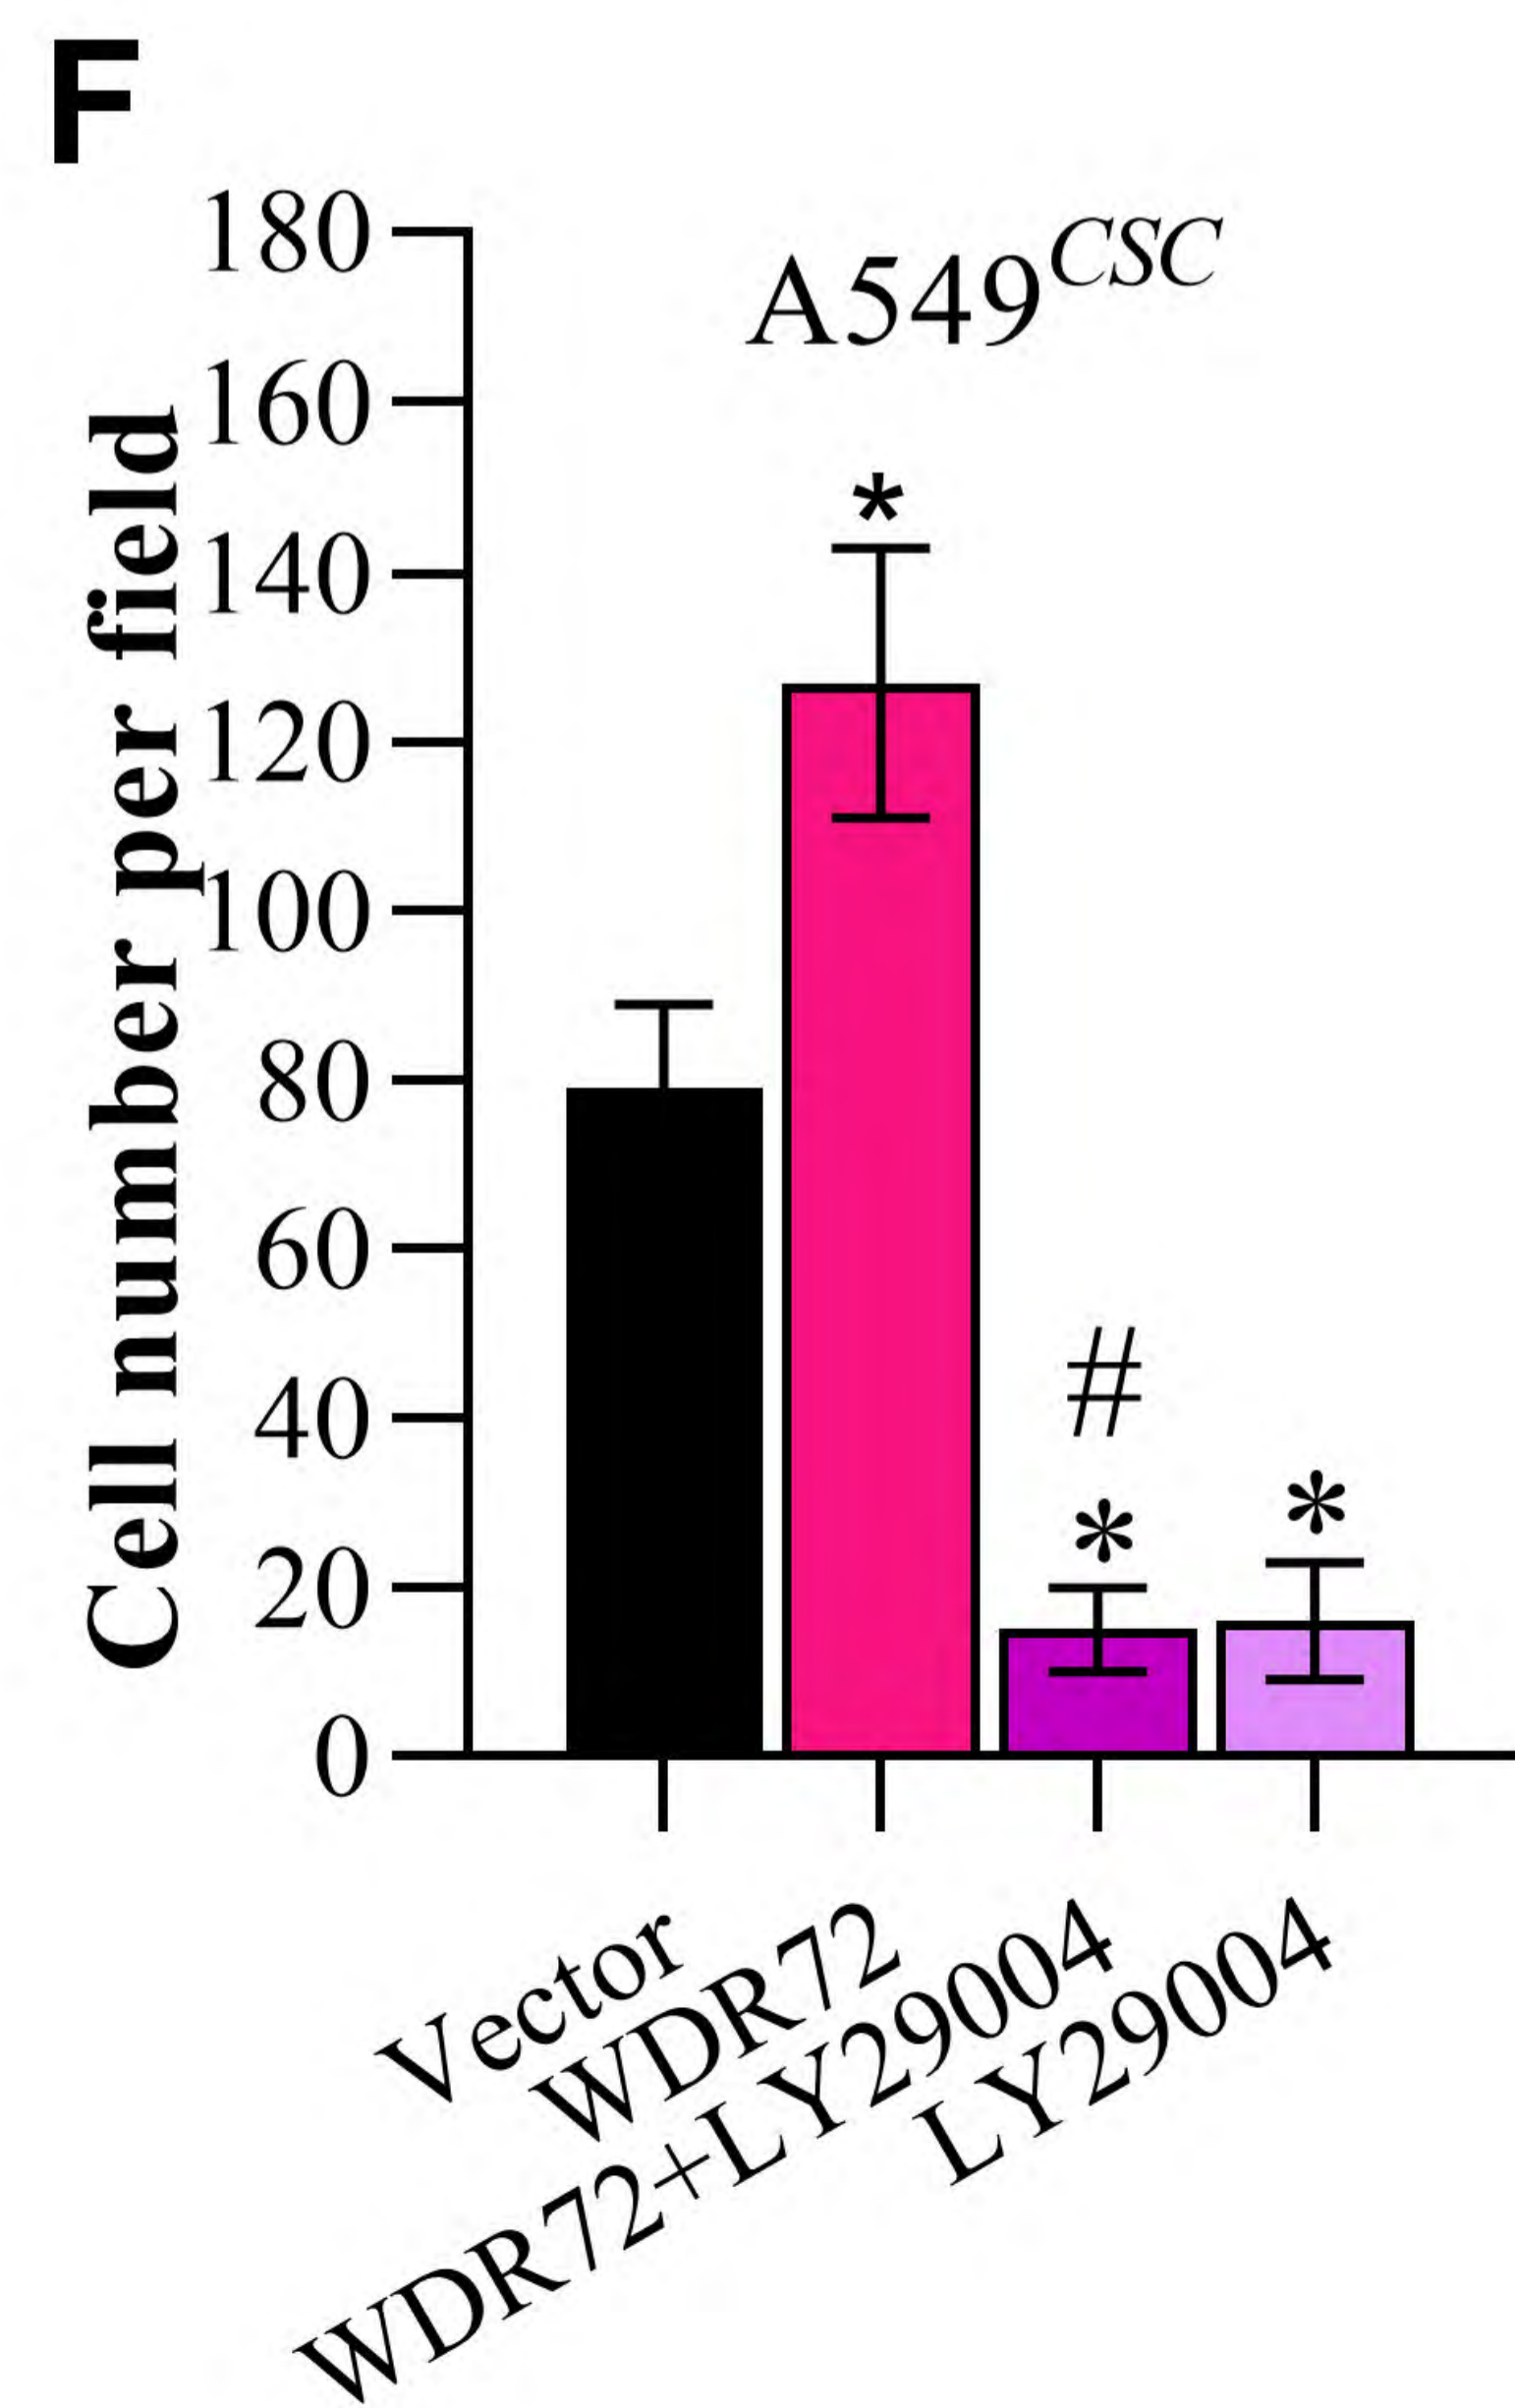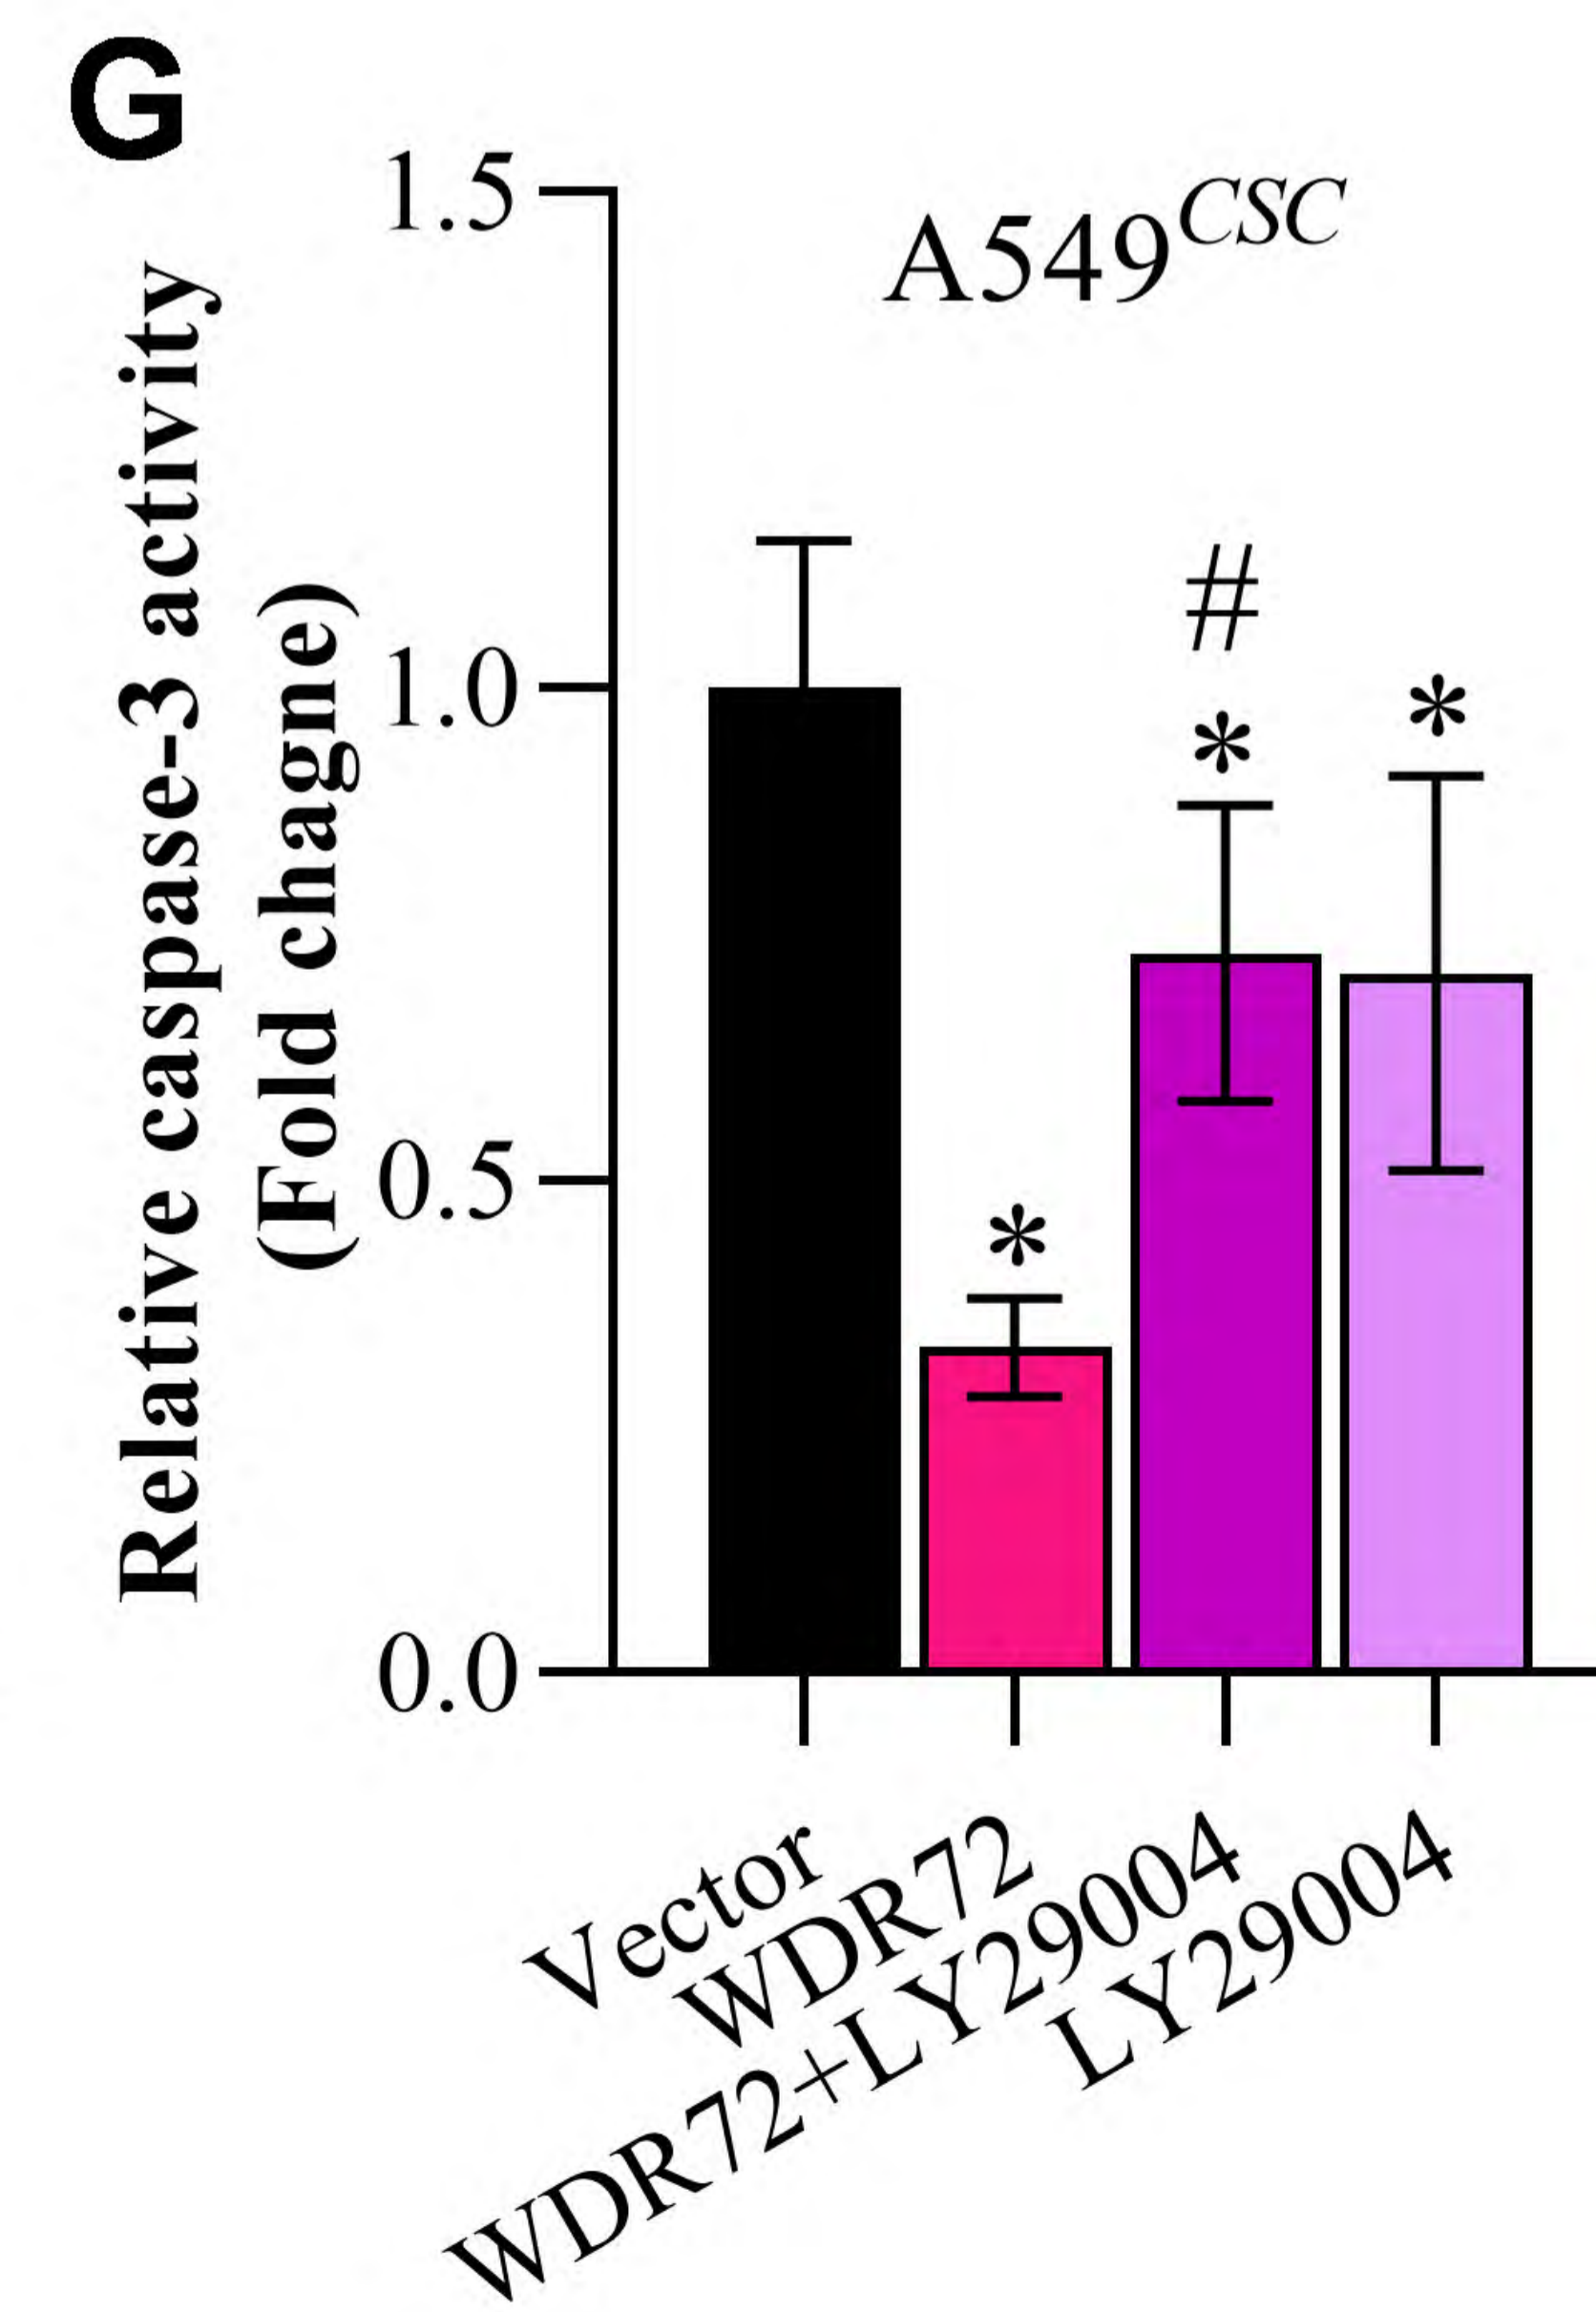



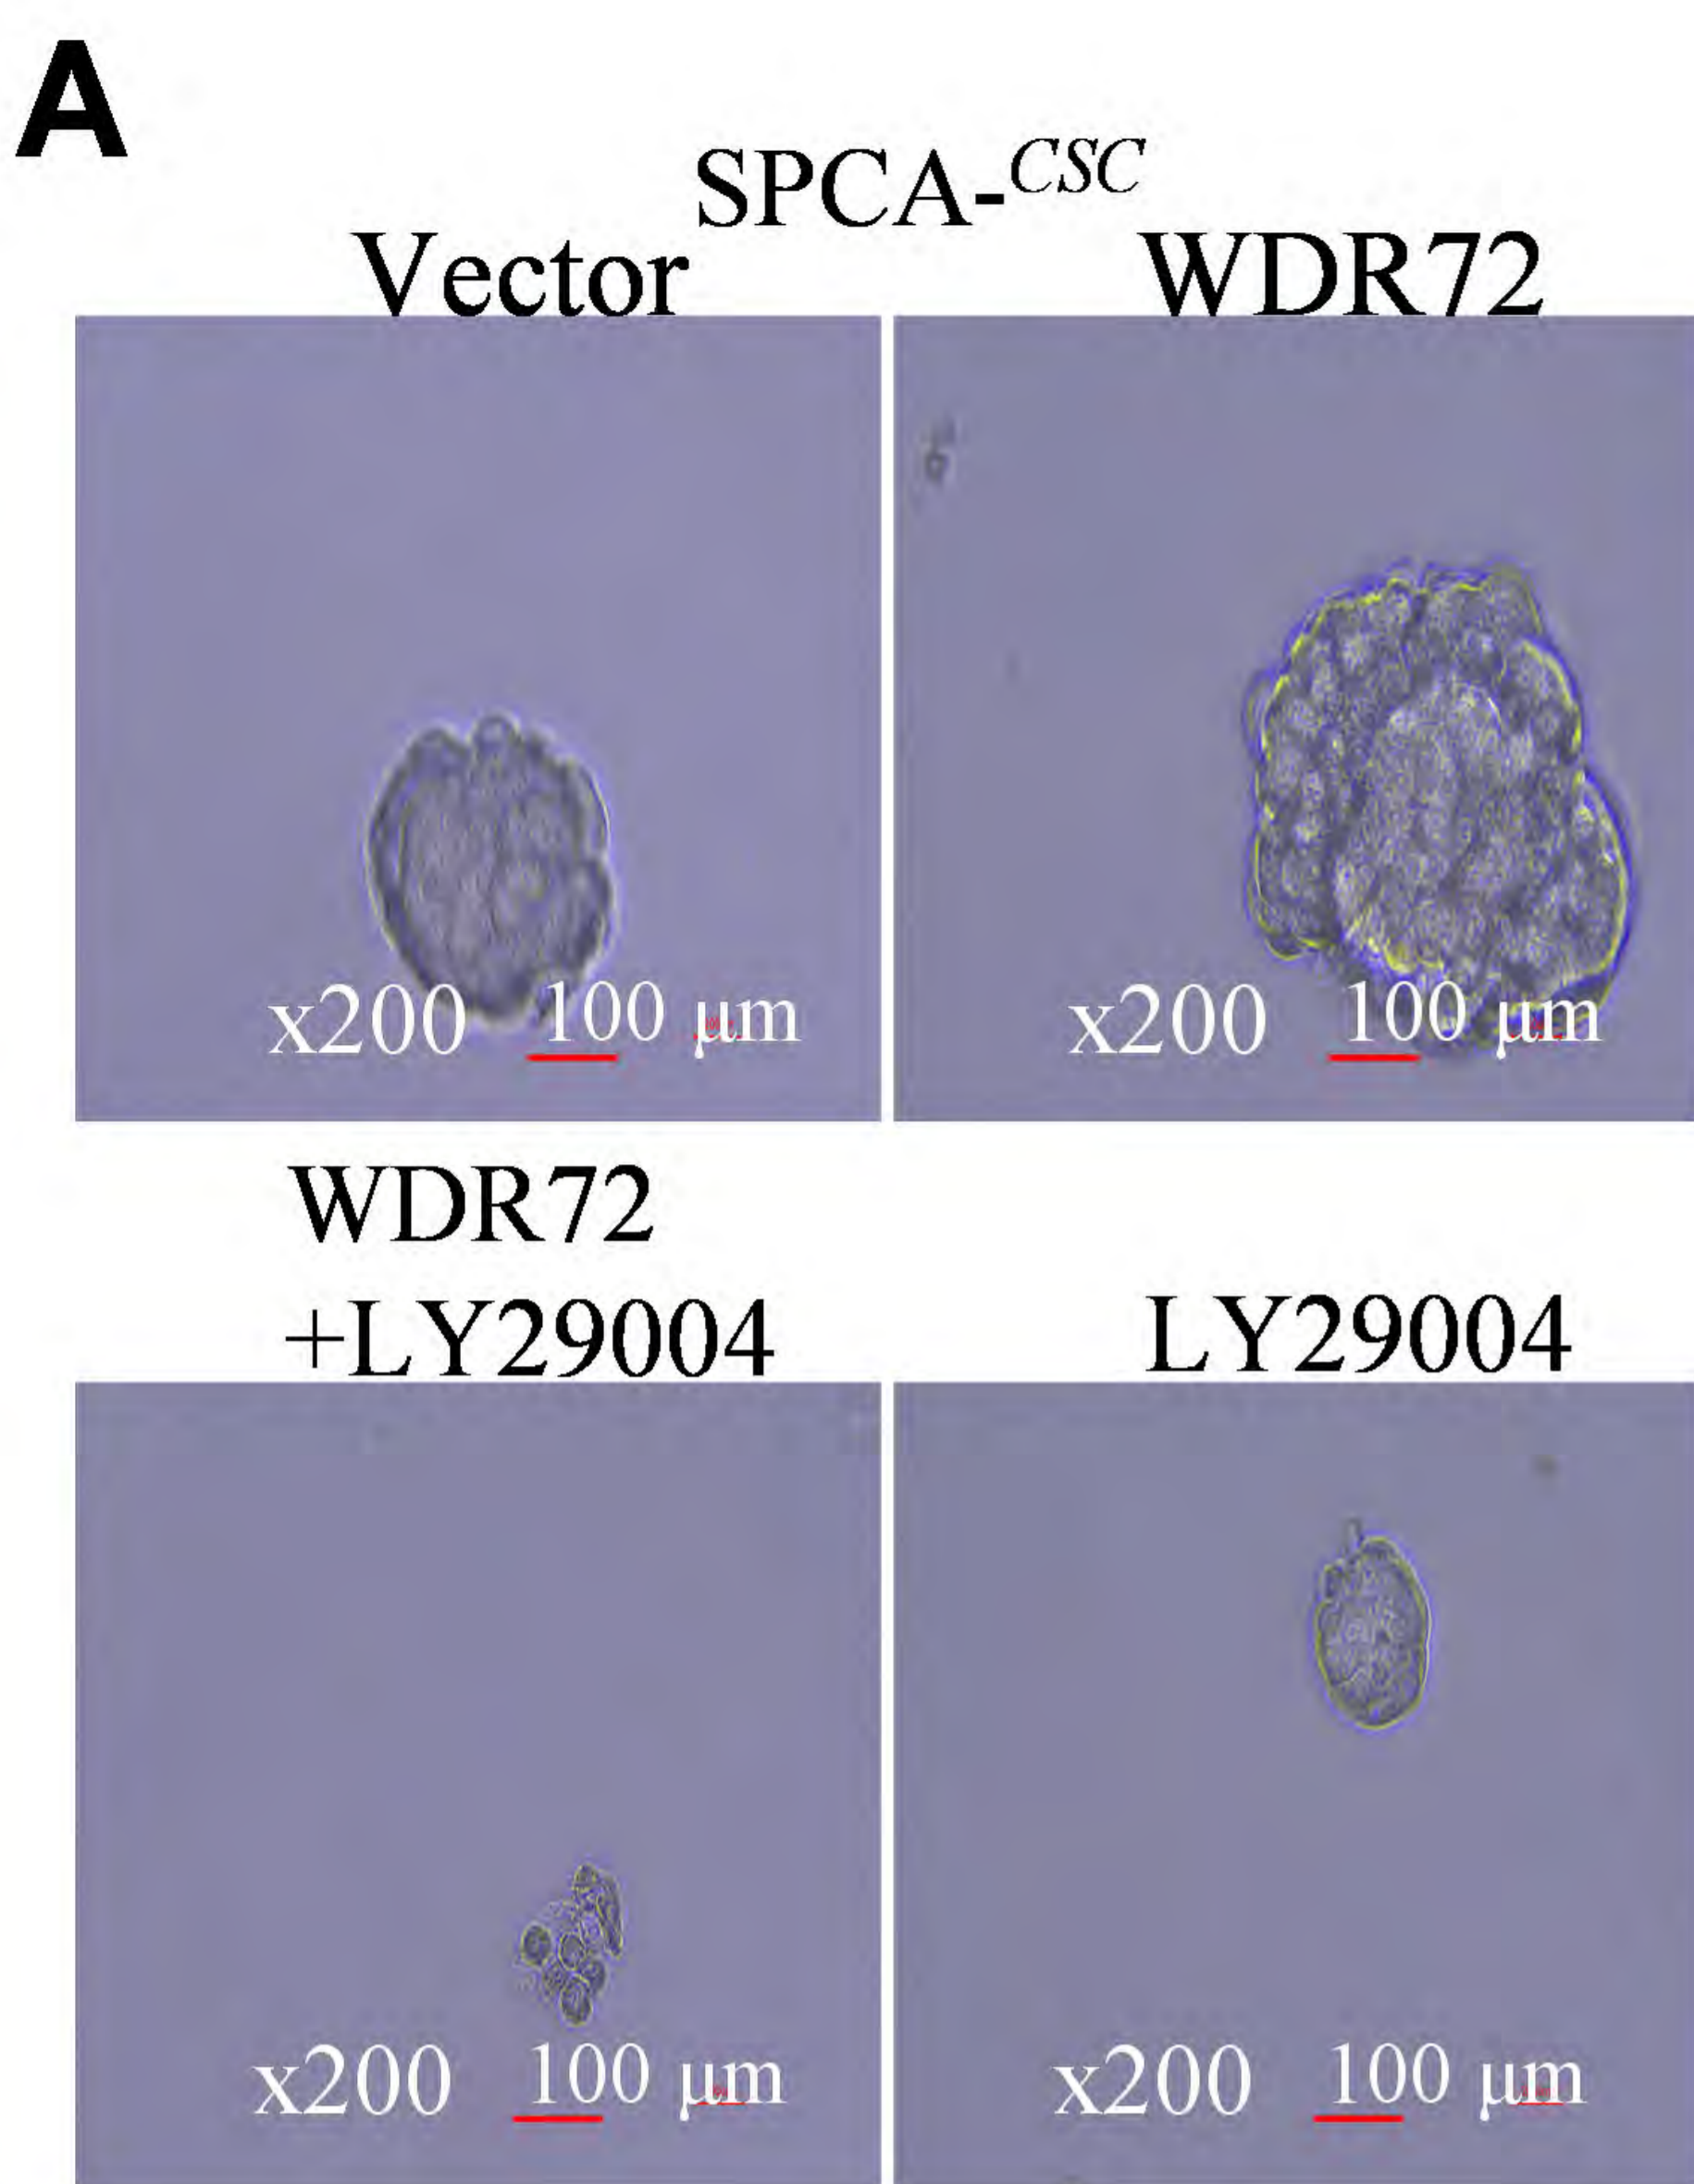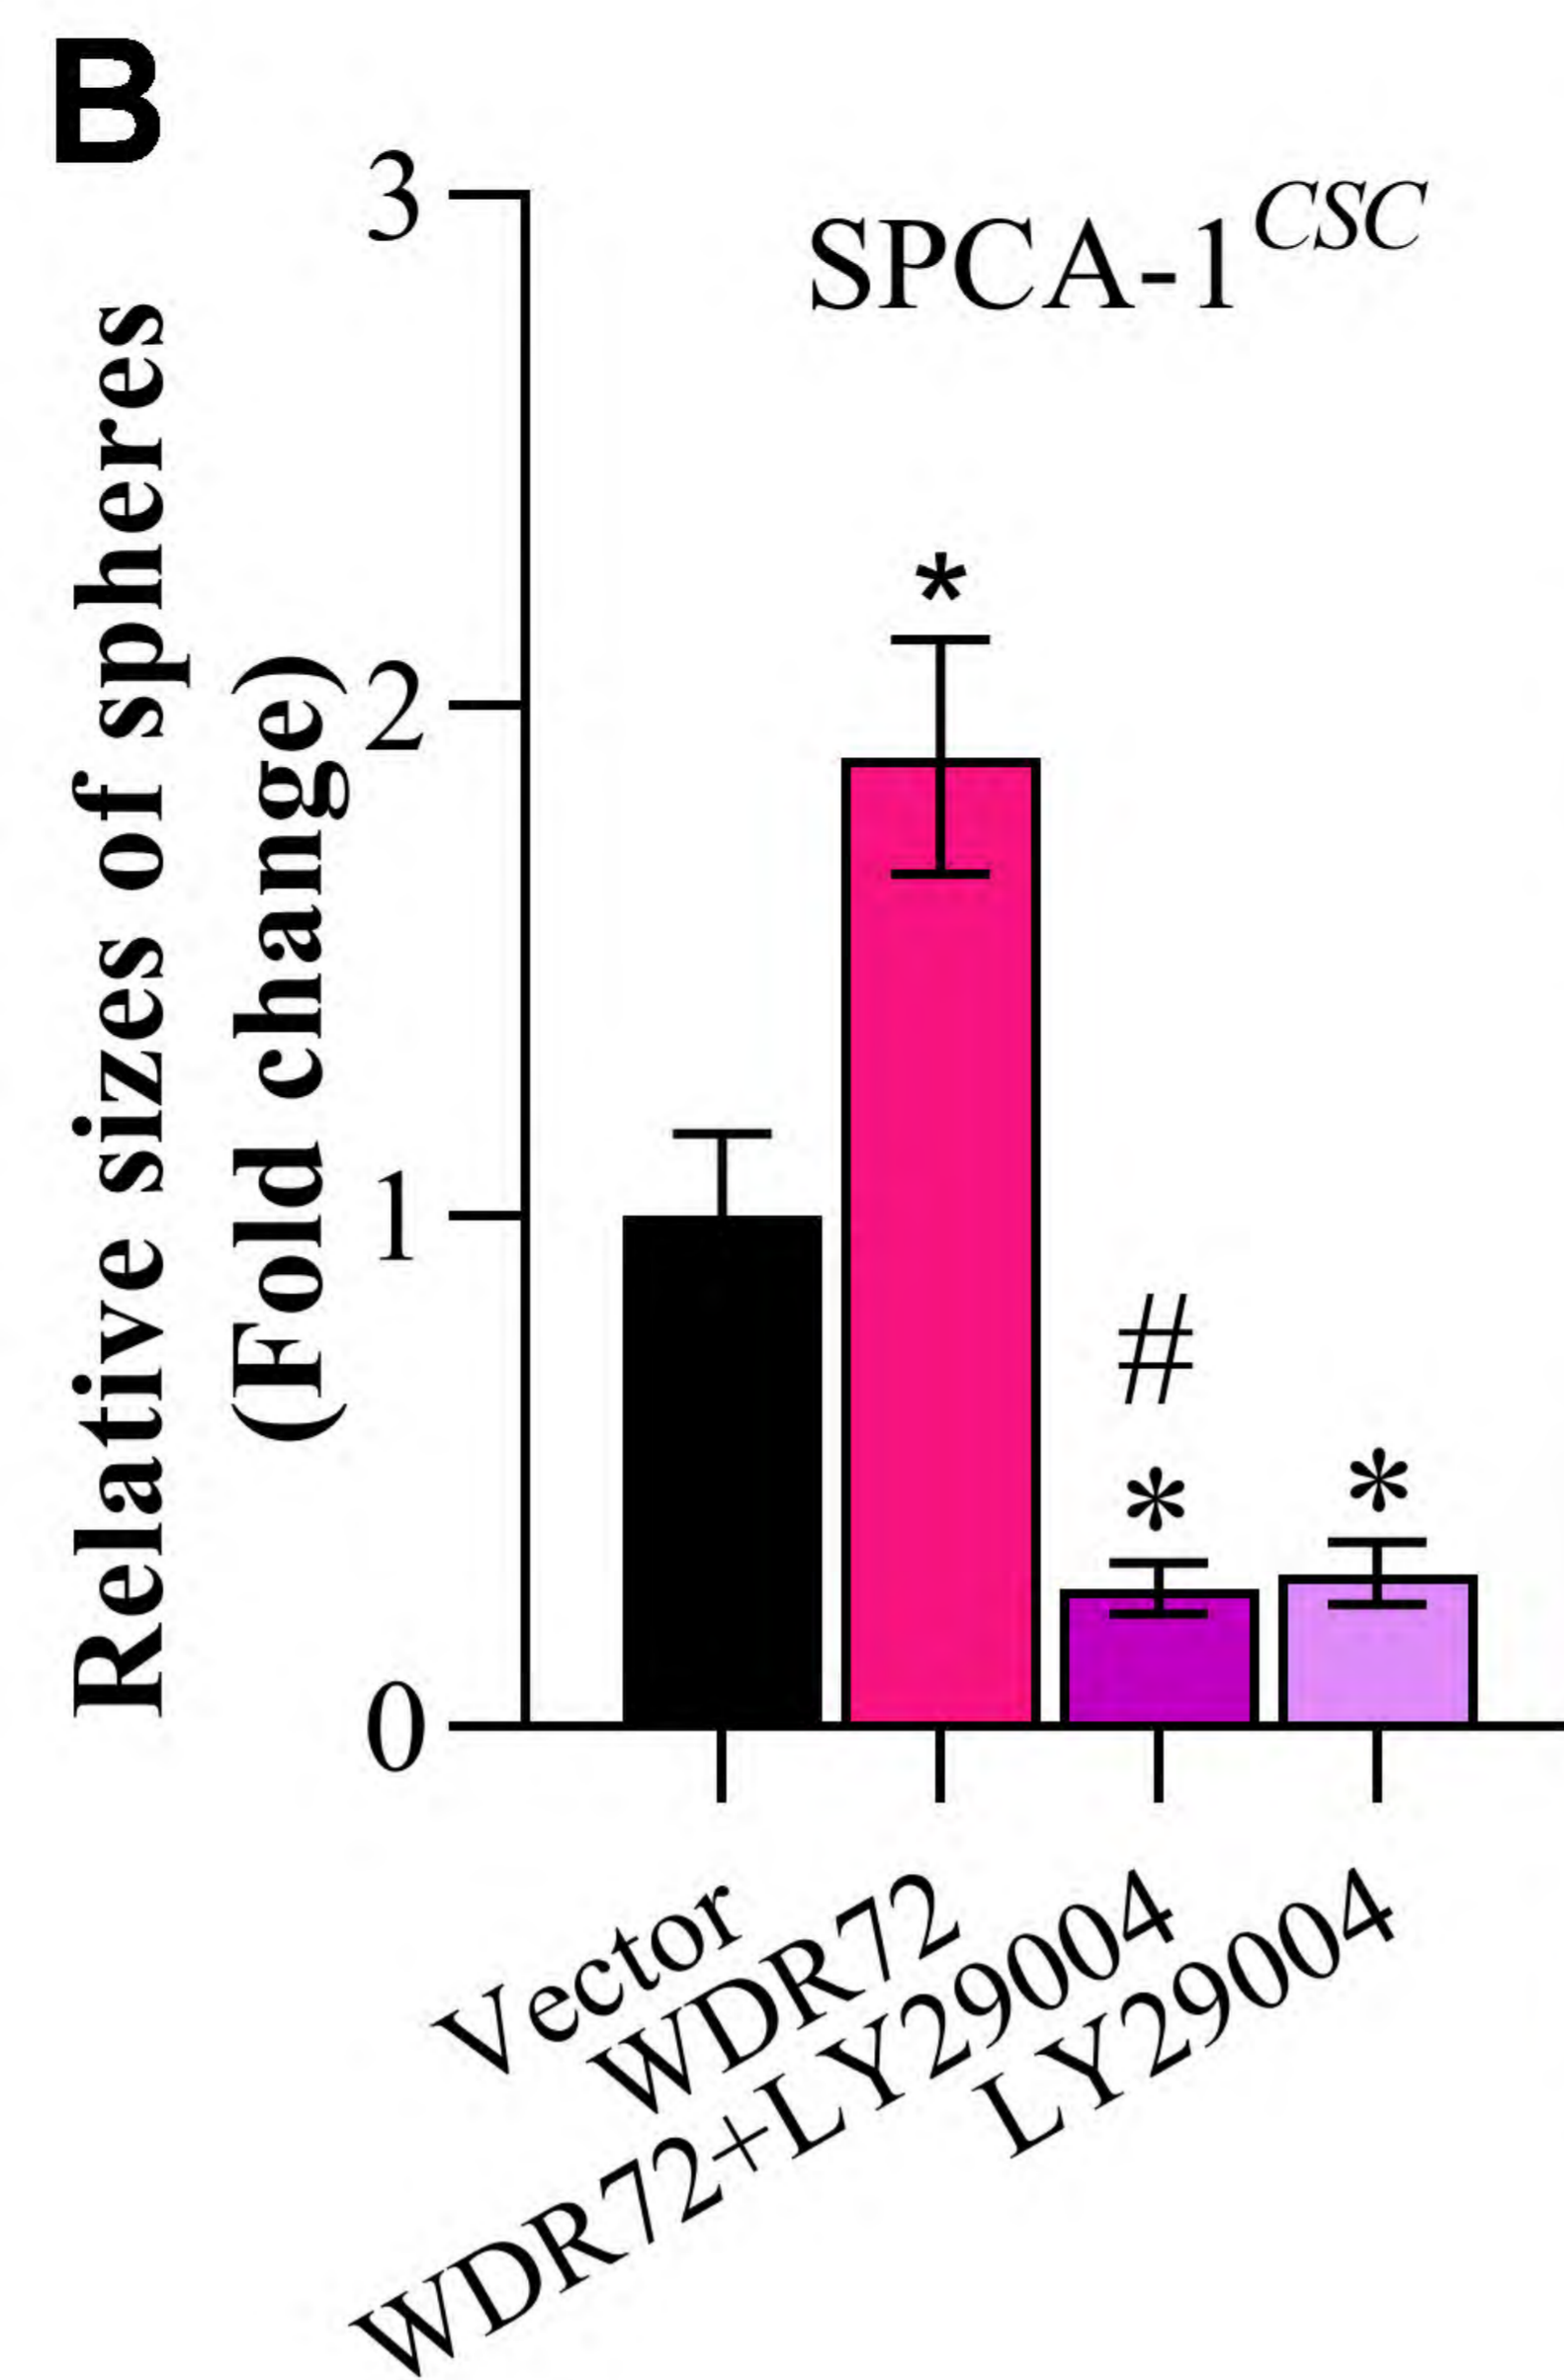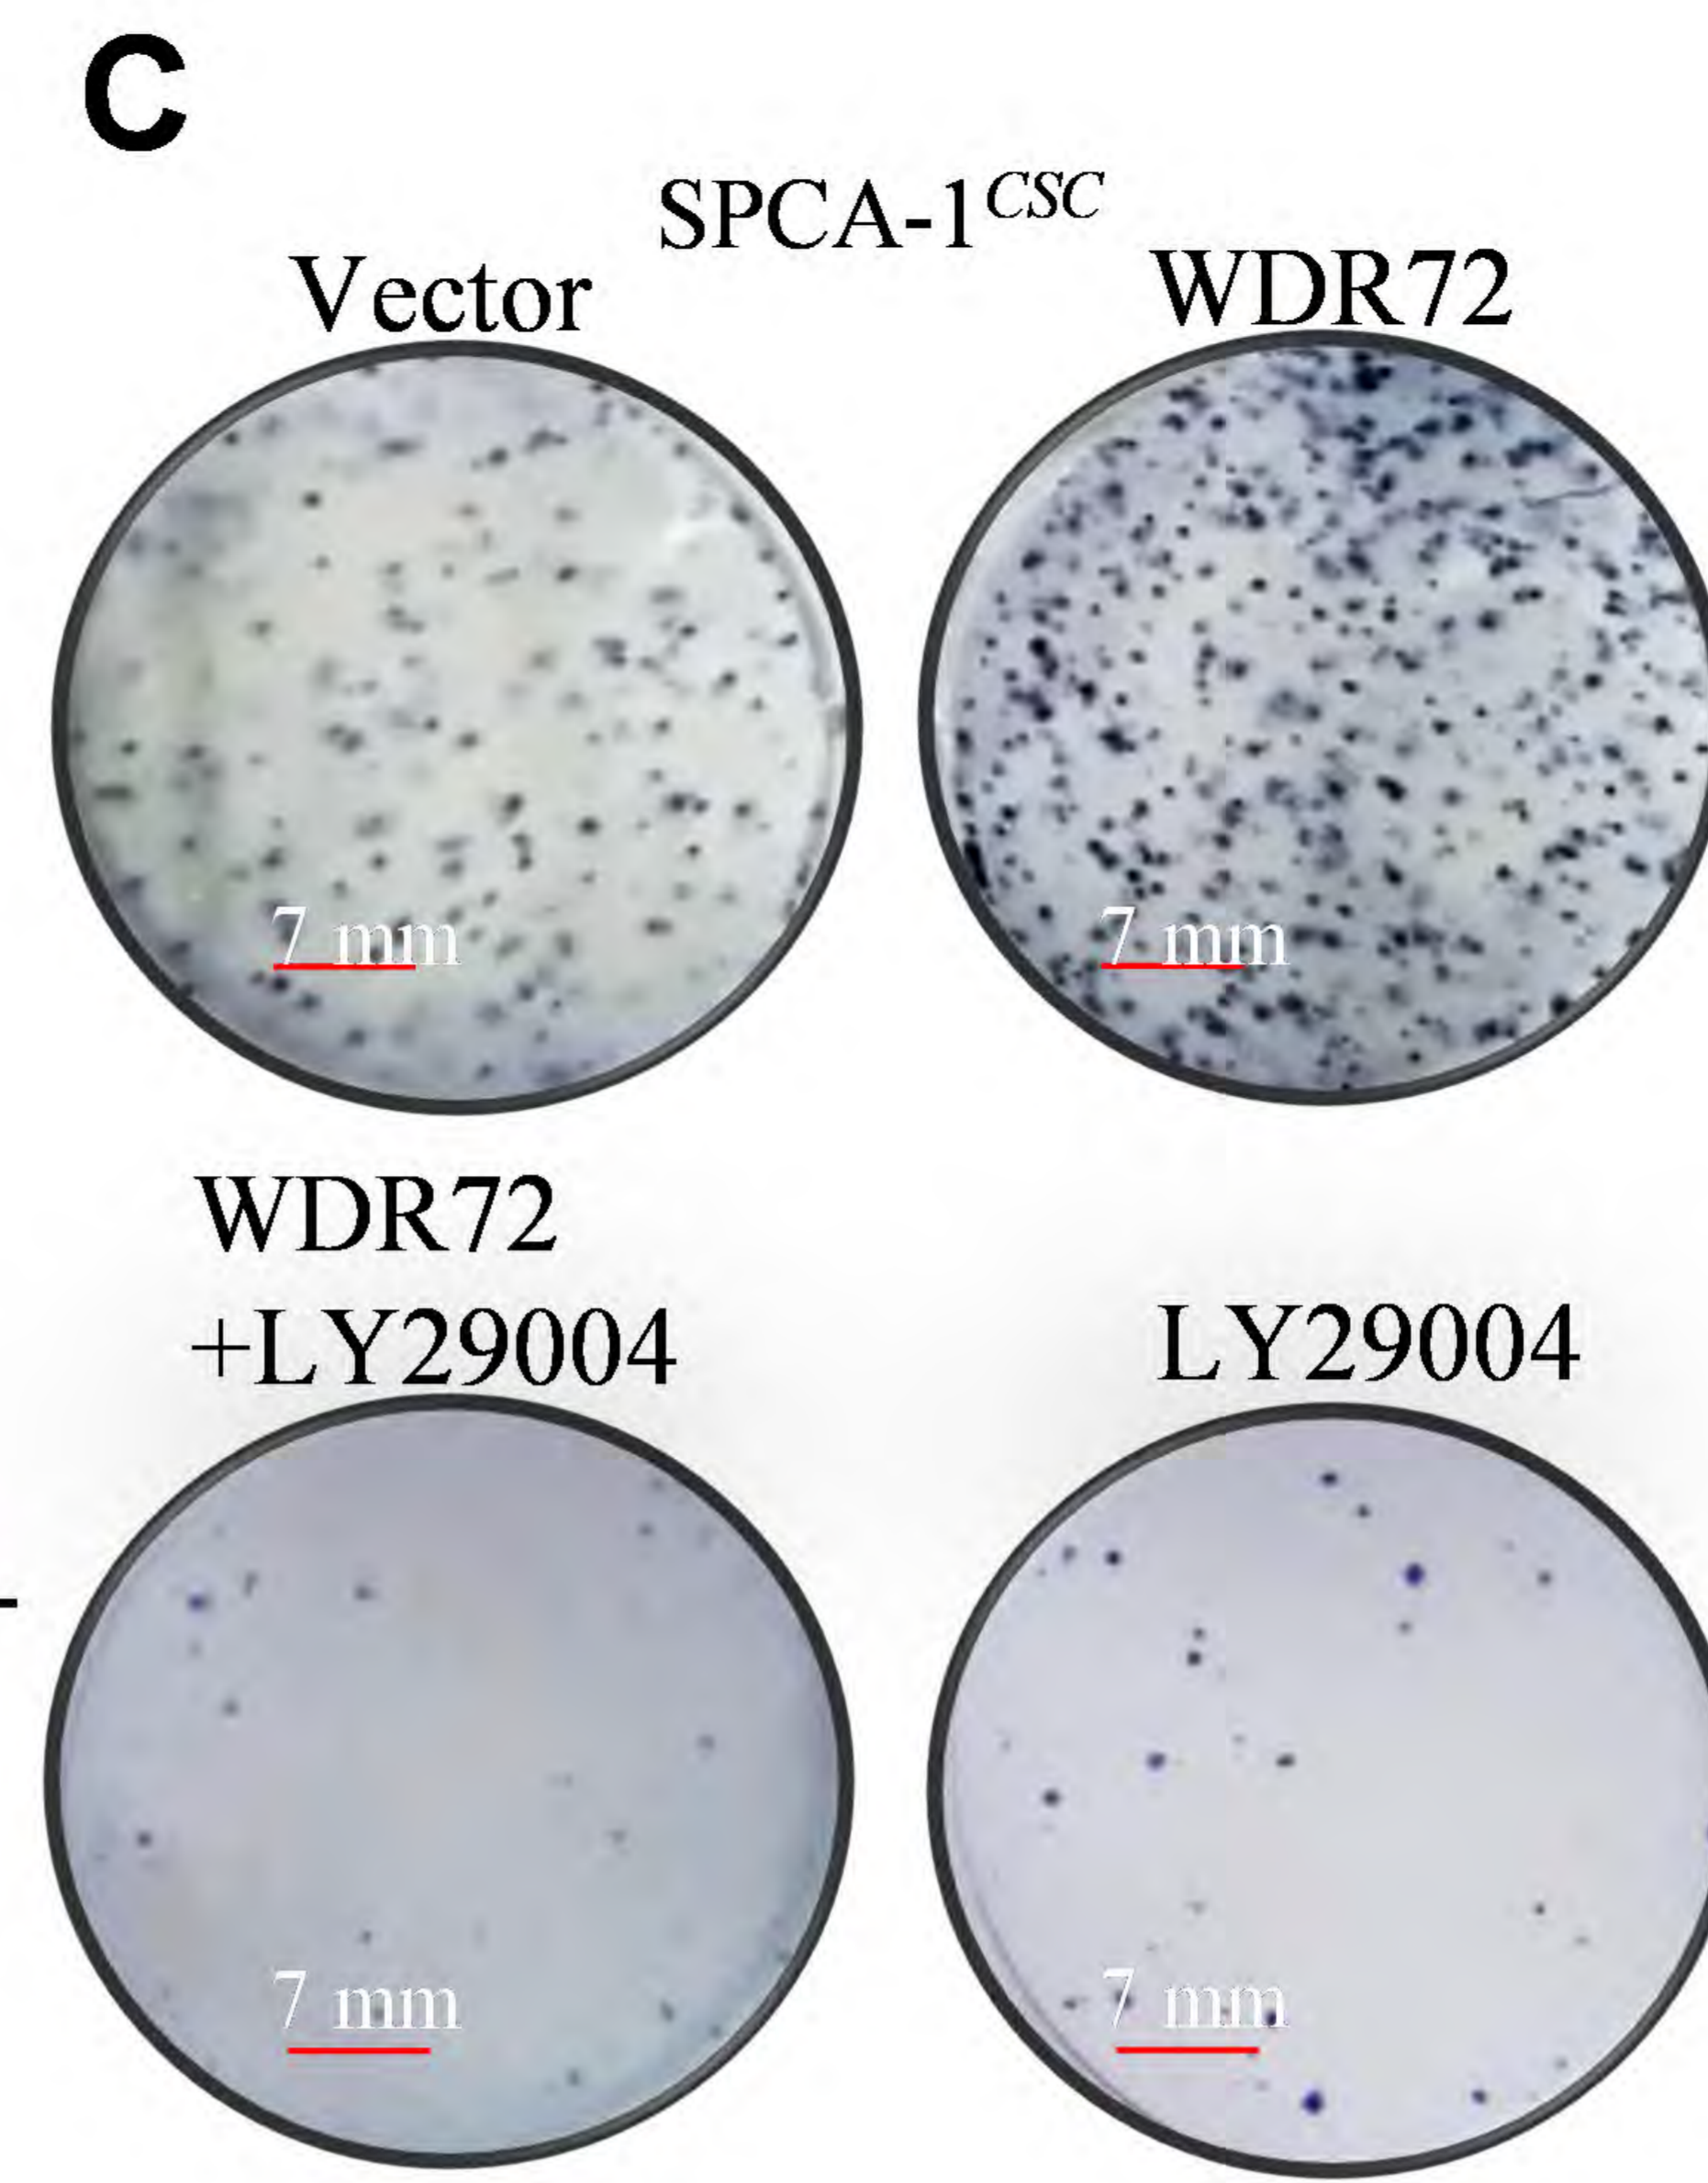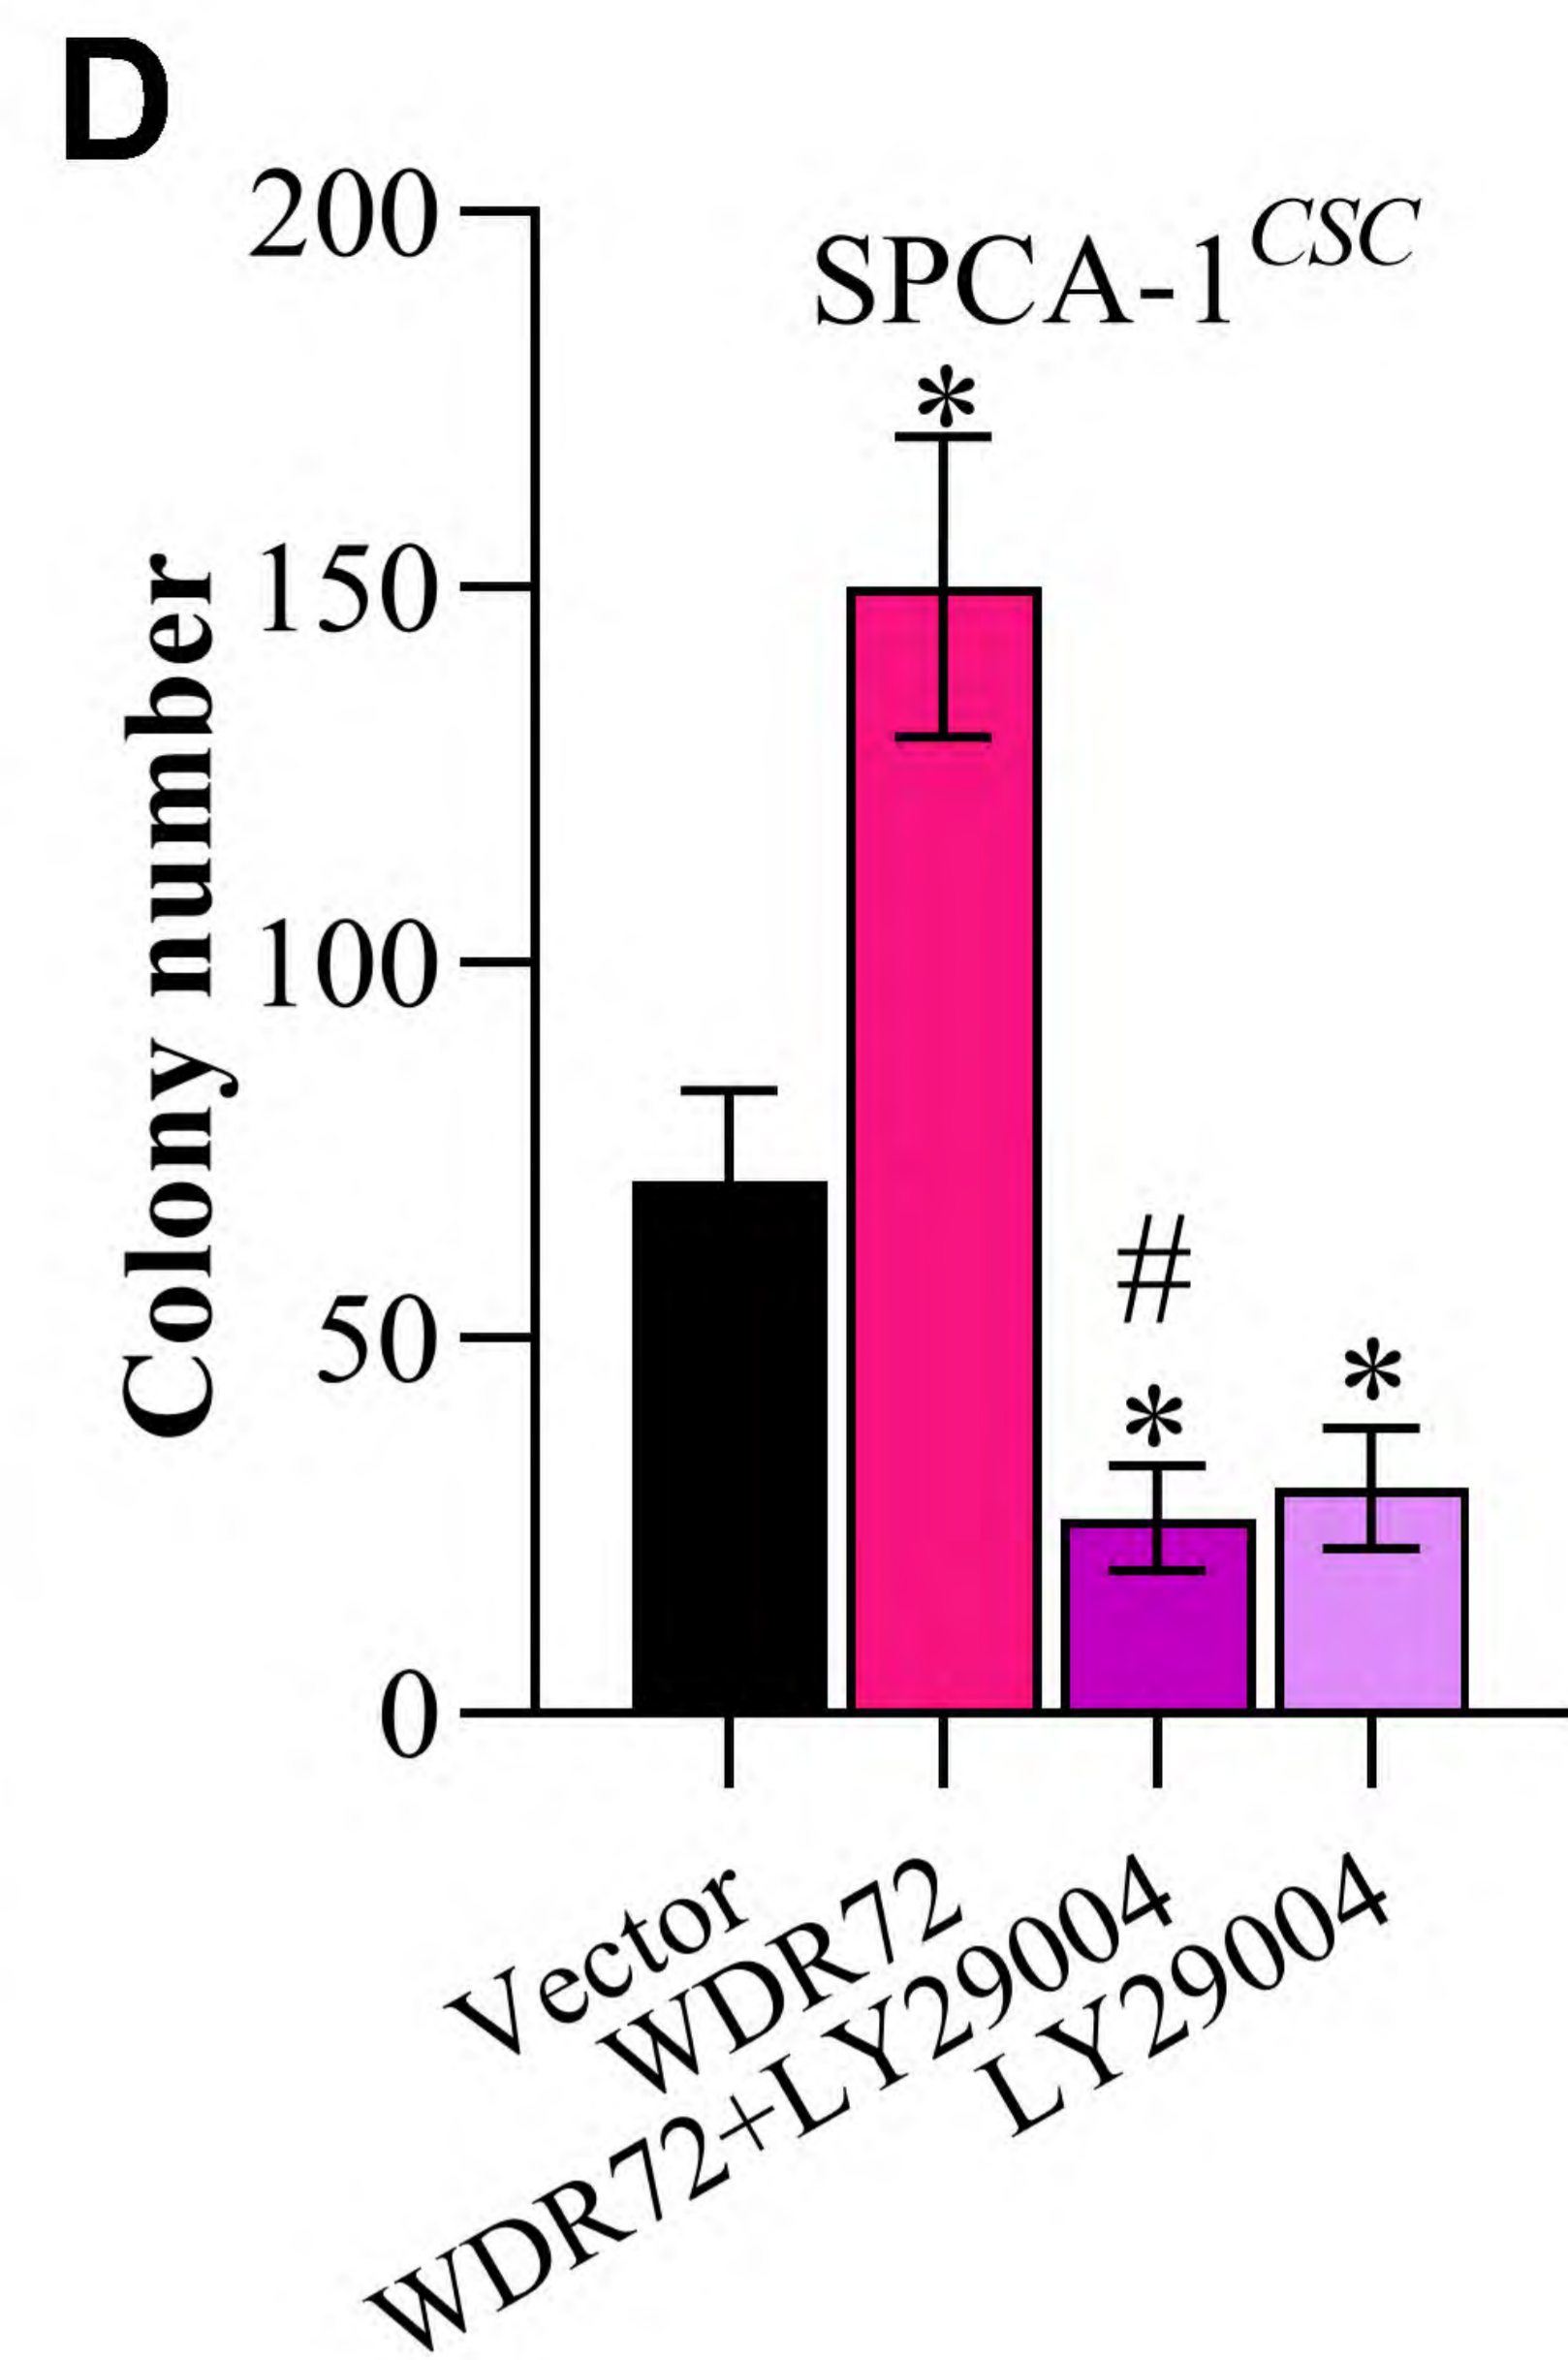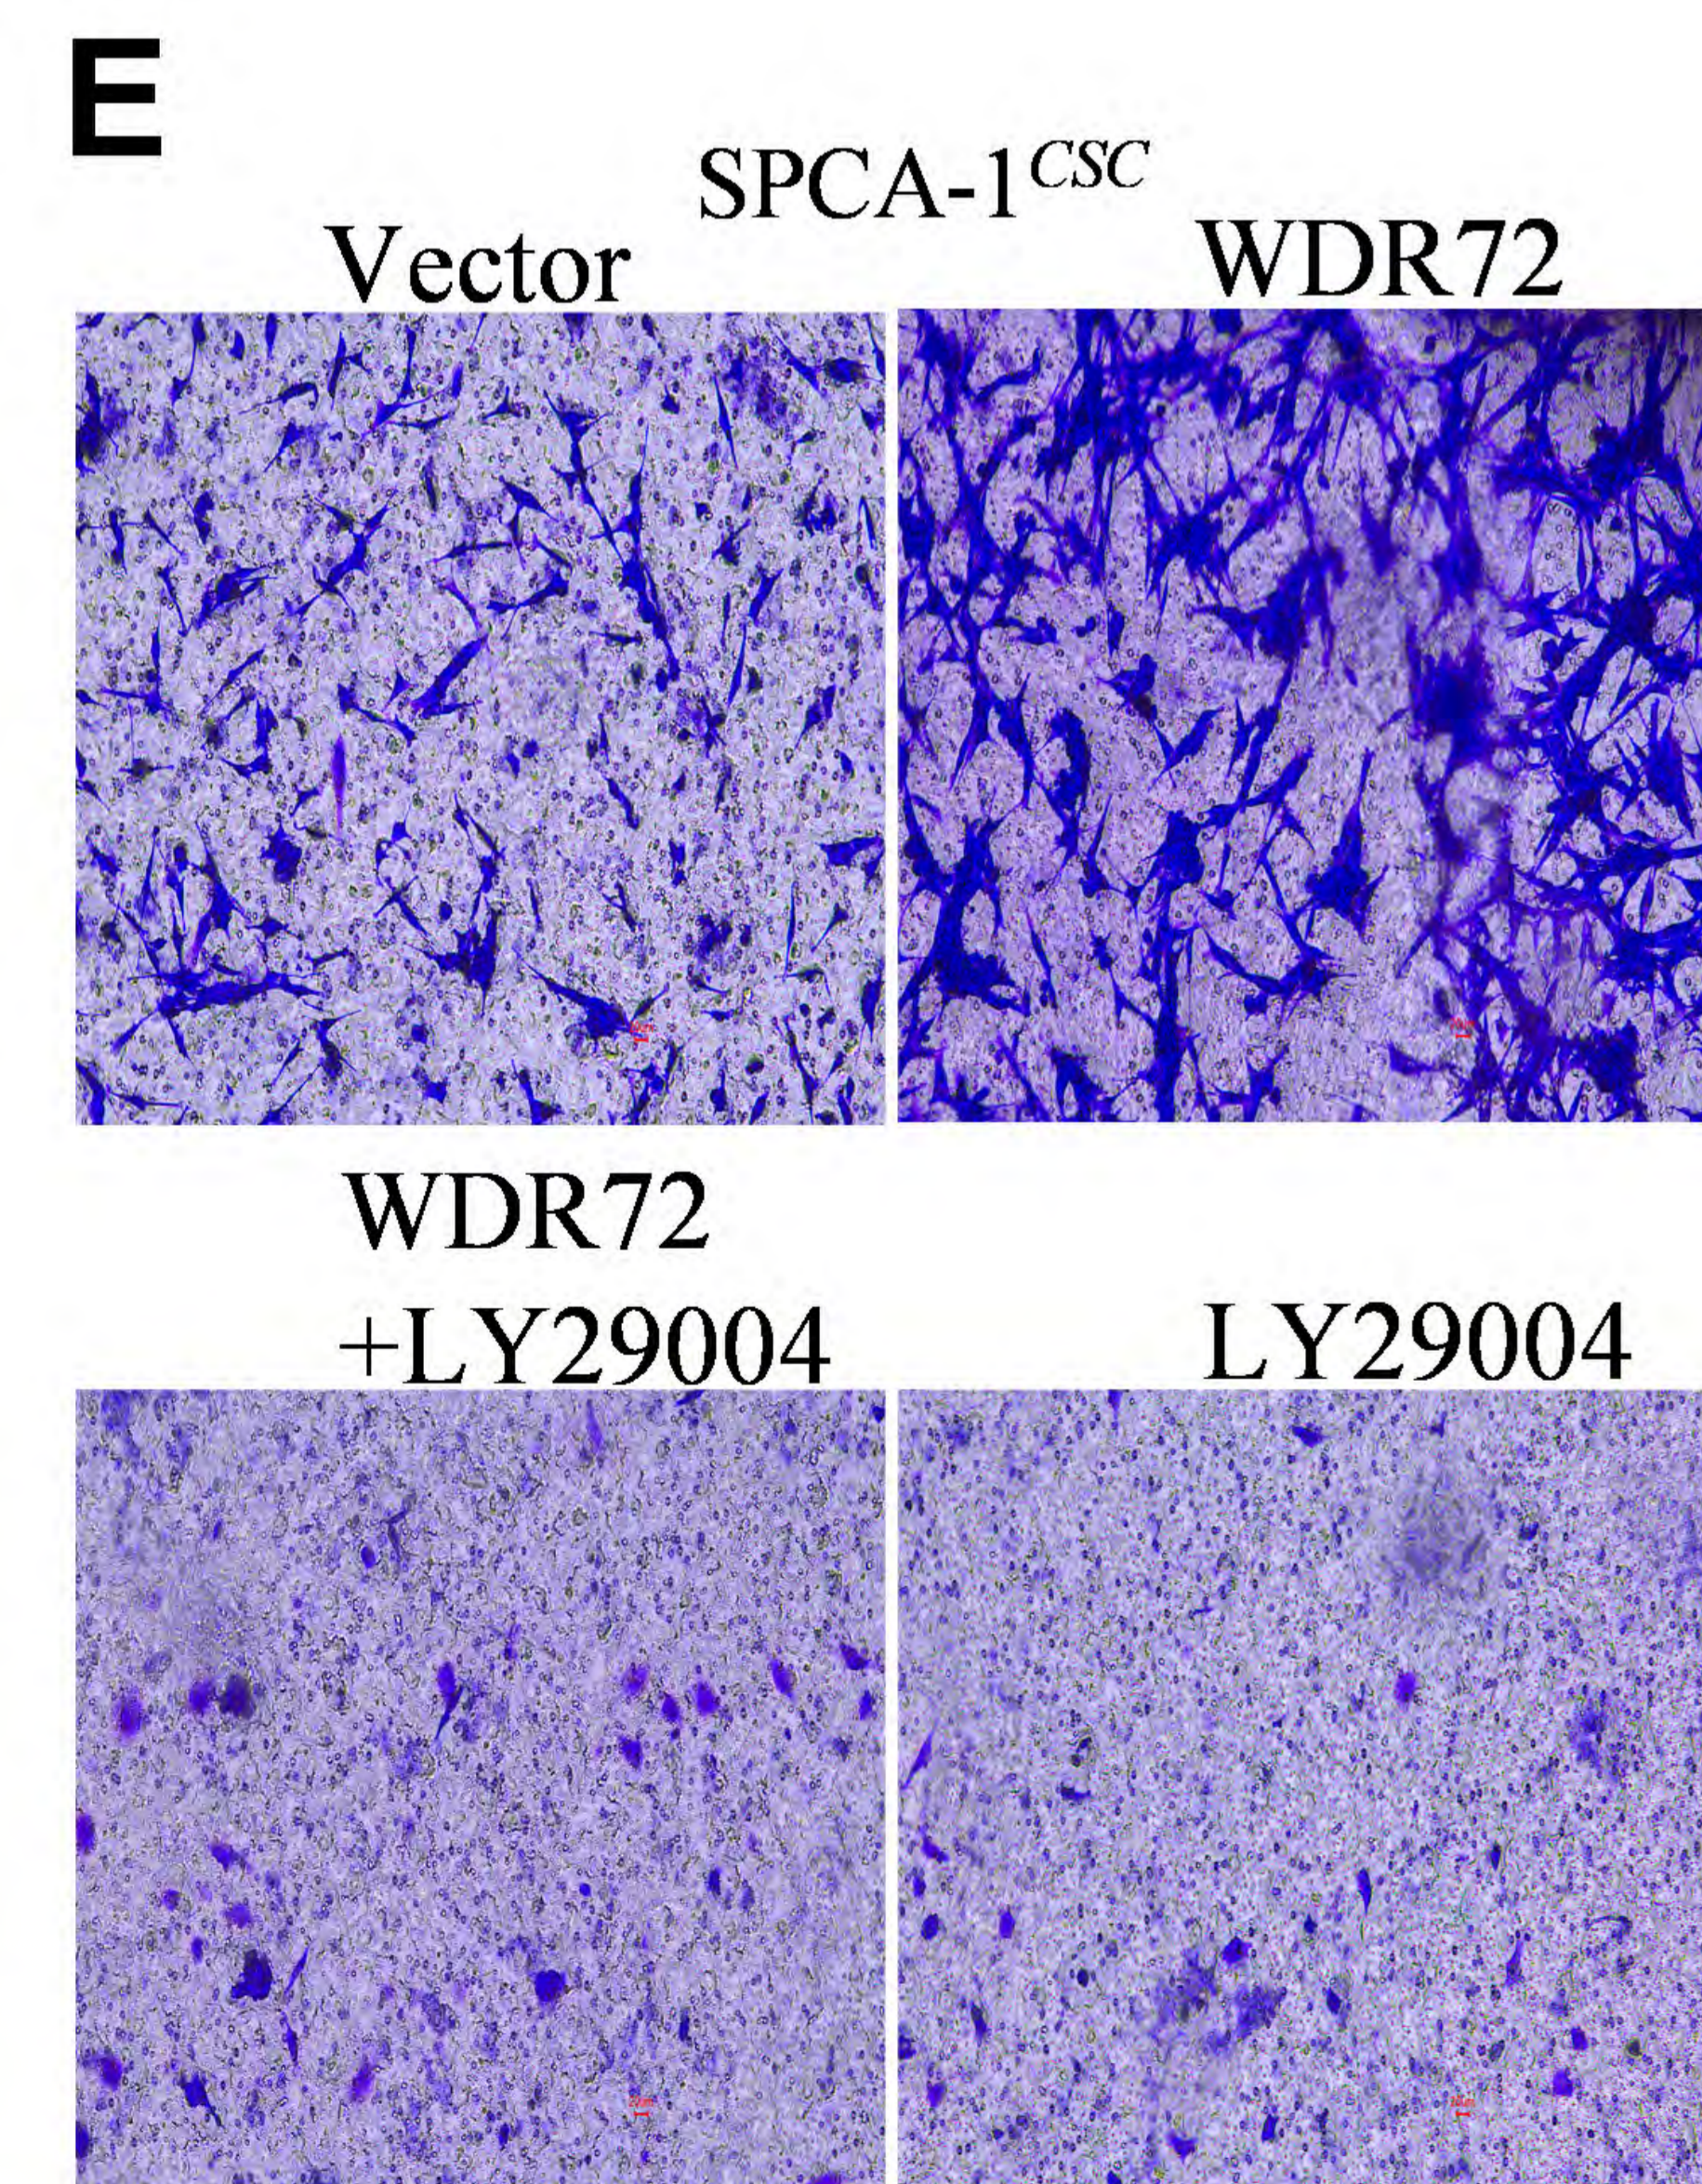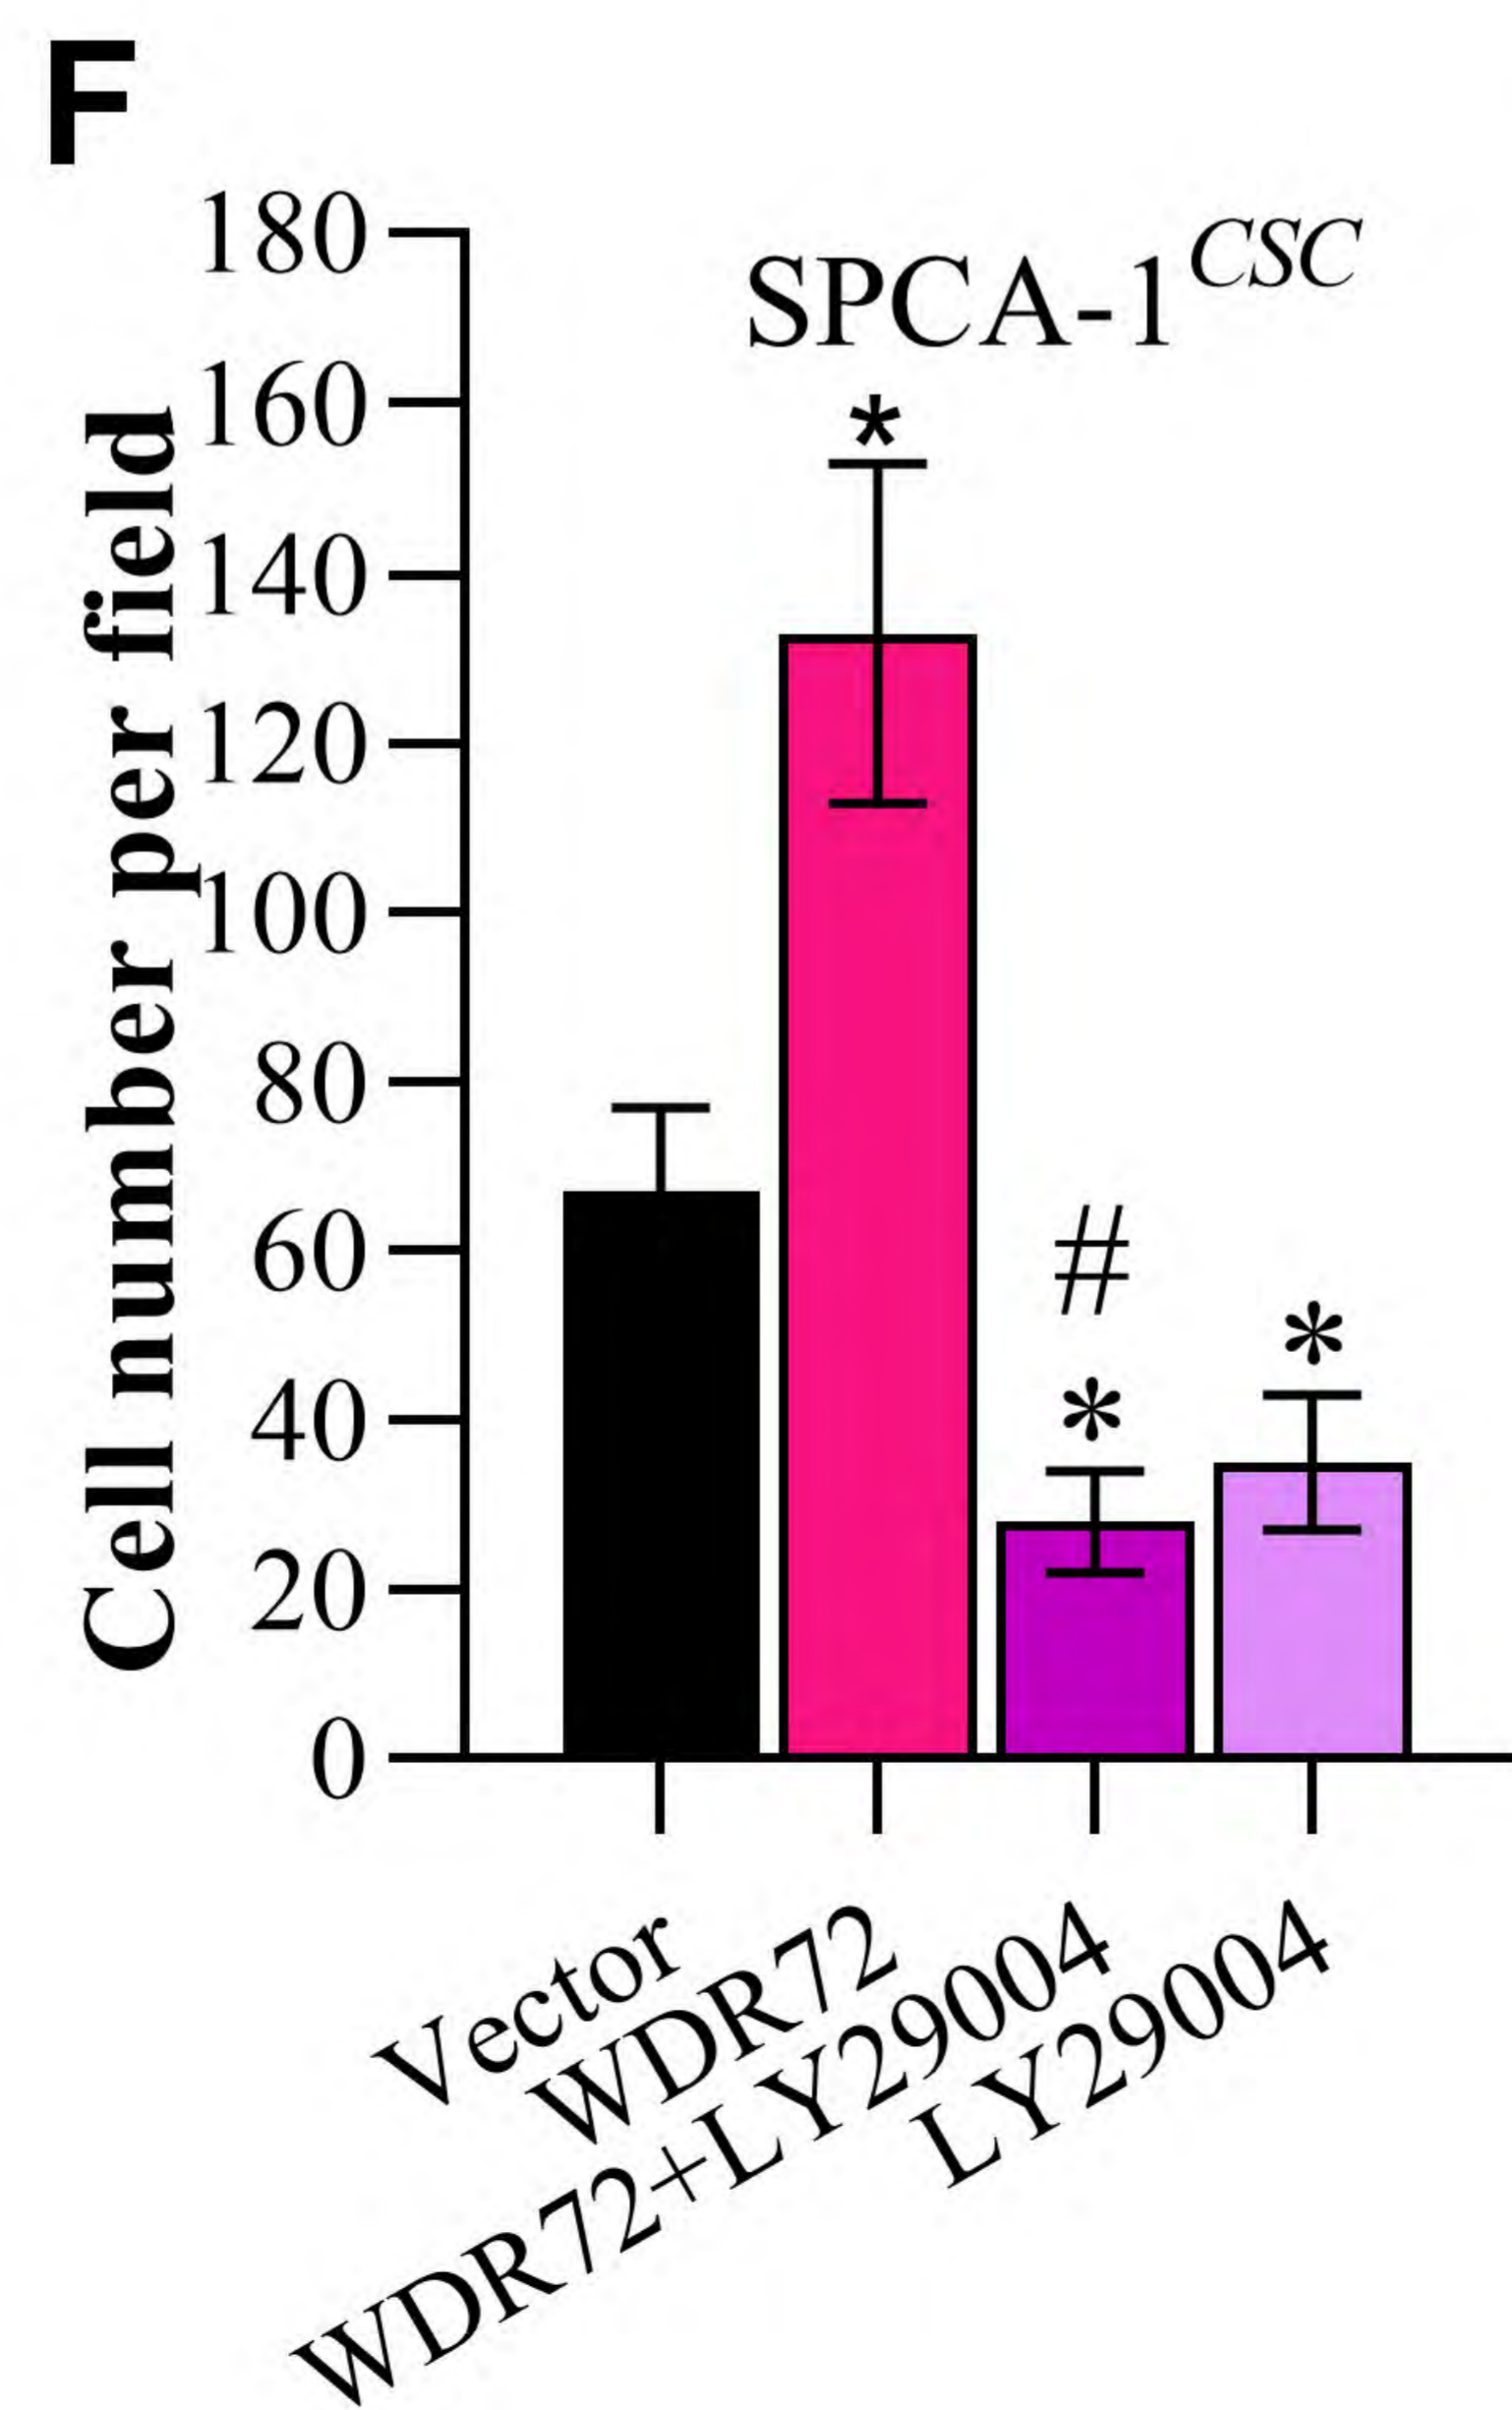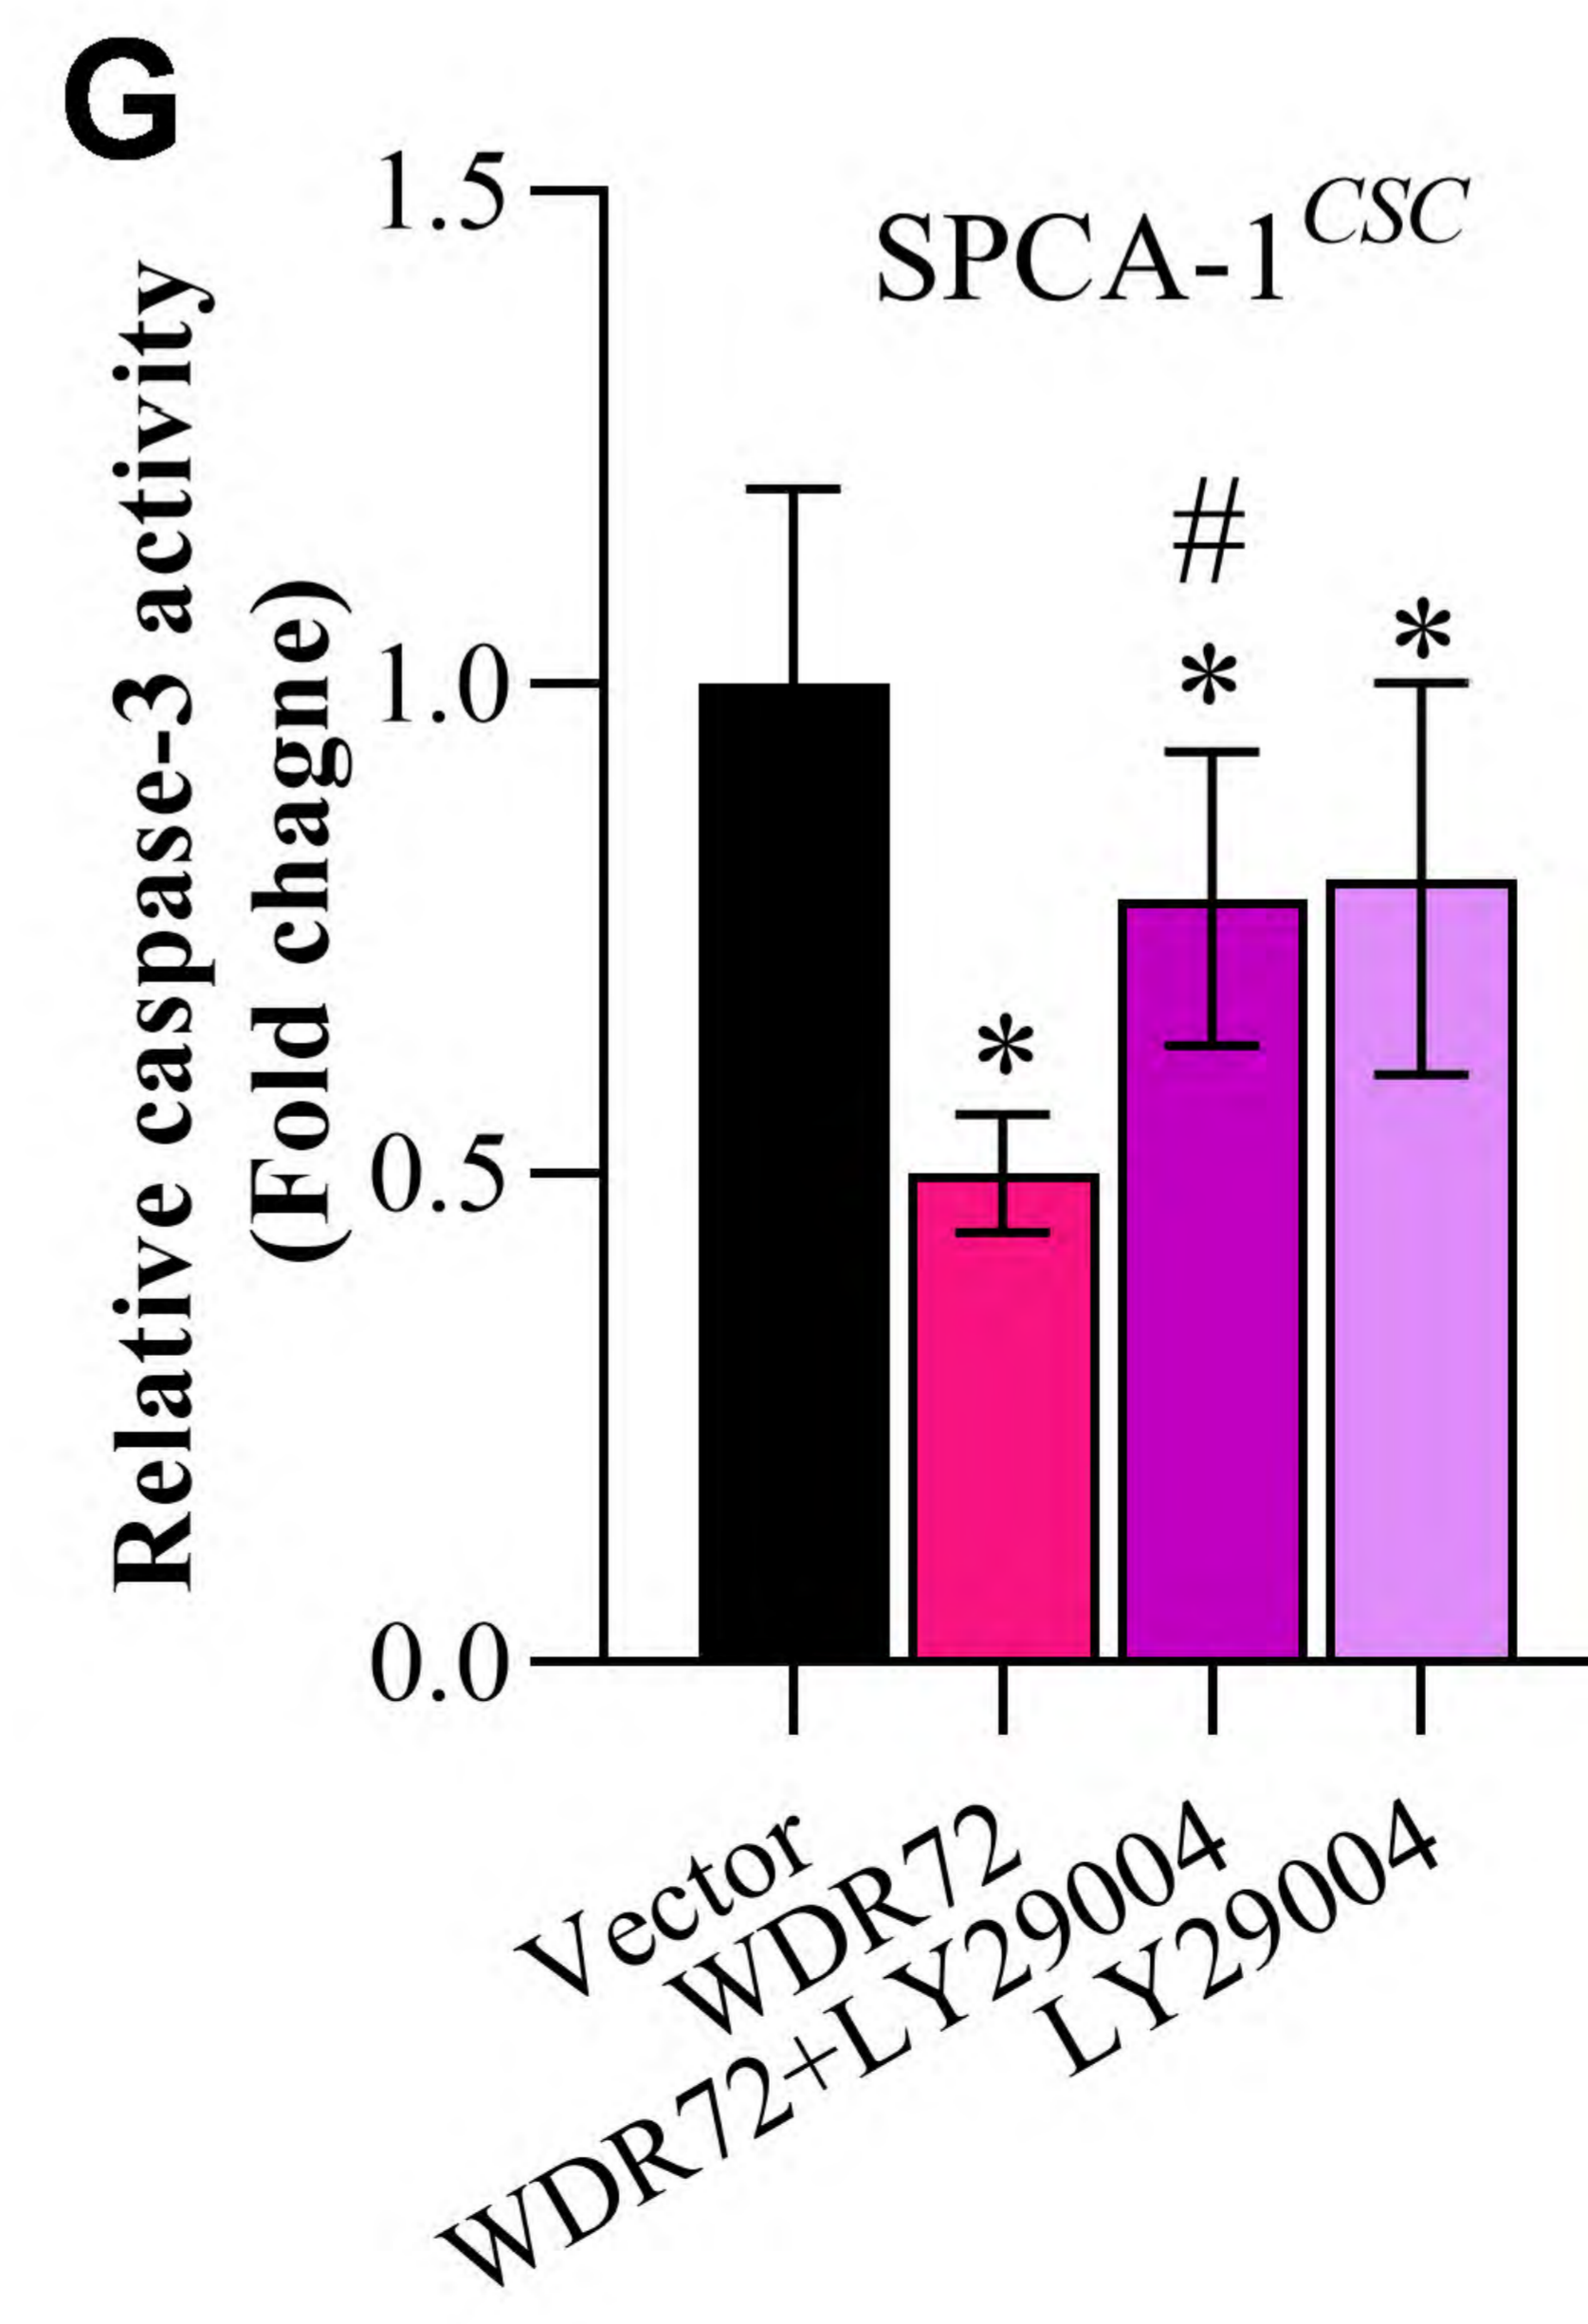

Supplement: f1 [file 5059588.f1.pdf]
